# Supplementary material for: miRVine: a microRNA expression atlas of grapevine based on small RNA sequencing
Source: PubMed Central journal article supplement (PMC4434875; doi:10.1186/s12864-015-1610-5), 2015-05-16

vvi-miRC1446

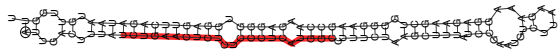

vvi-miRC159d

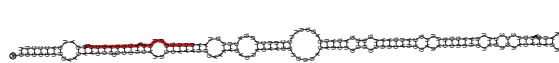

vvi-miRC159e

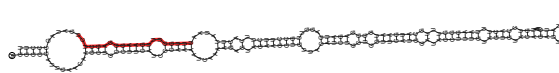

vvi-miRC159f

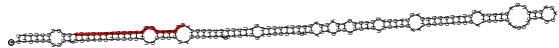

vvi-miRC166i

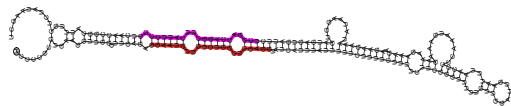

vvi-miRC171j

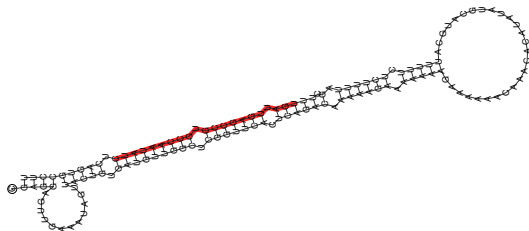

vvi-miRC172e

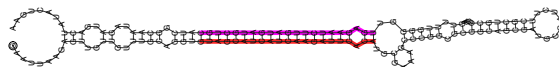

grape-m3966

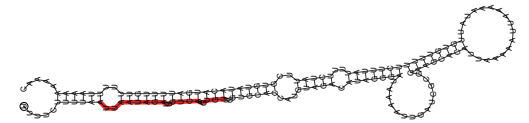

grape-m4051

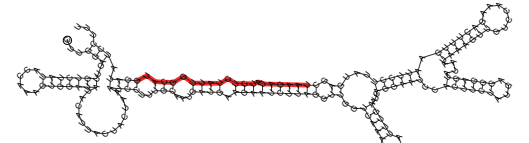

grape-m4178

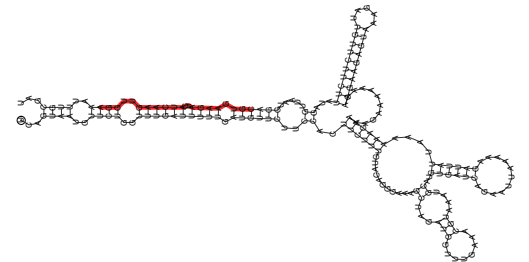

grape-m4179

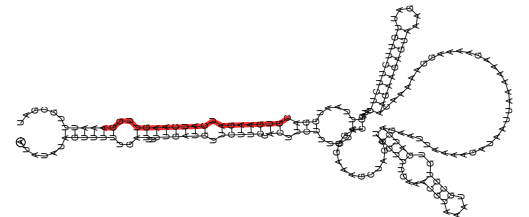

grape-m4180

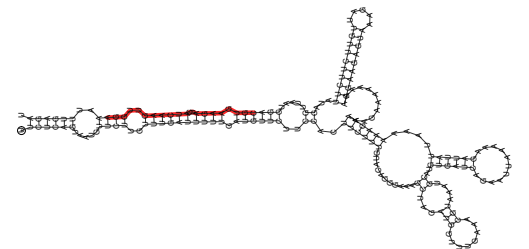

grape-m4207

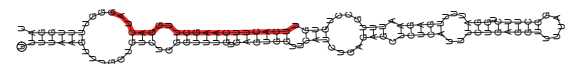

grape-m4241

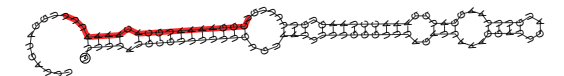

vvi-miRC172f

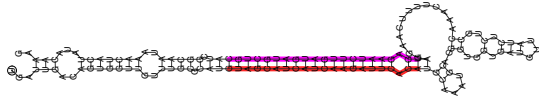

vvi-miRC2275

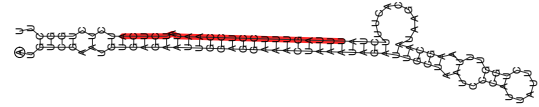

vvi-miRC2275a

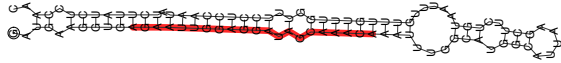

vvi-miRC3627a

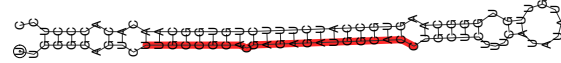

vvi-miRC3629d

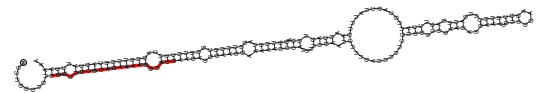

vvi-miRC3629e

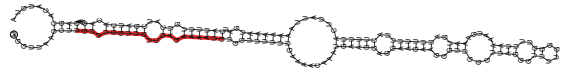

vvi-miRC390a

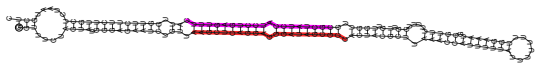

grape-m4250

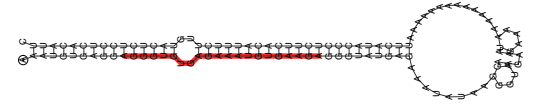

grape-m4269

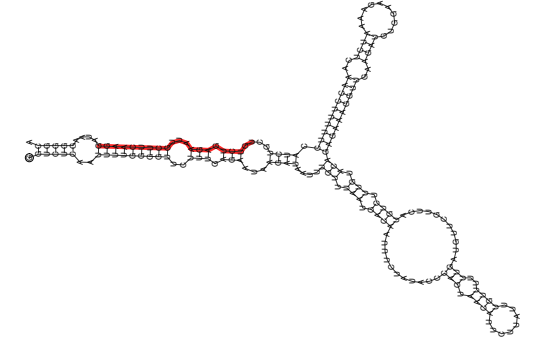

grape-m4277

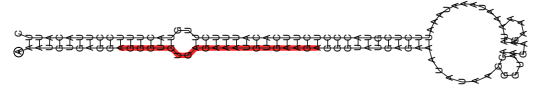

grape-m4281

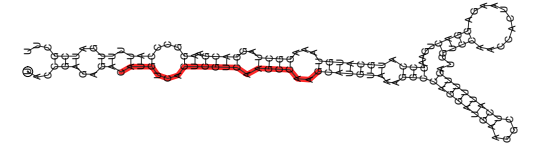

grape-m4363

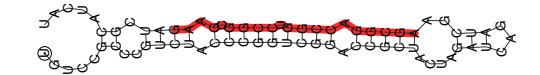

grape-m4455

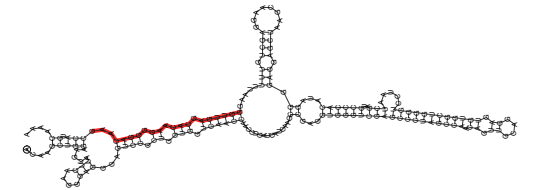

grape-m4520

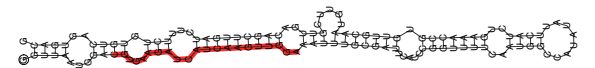

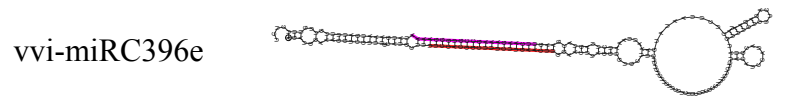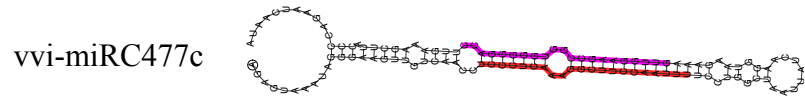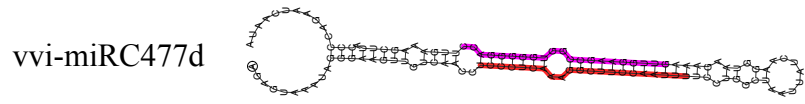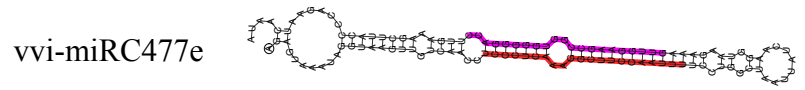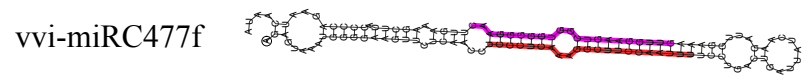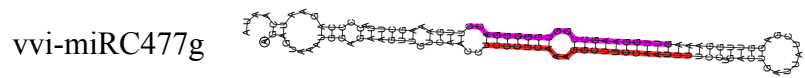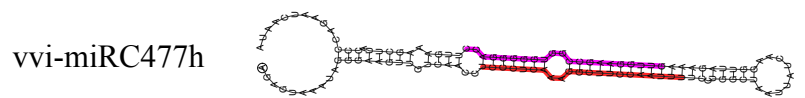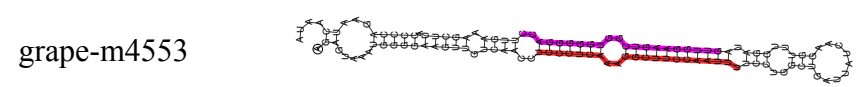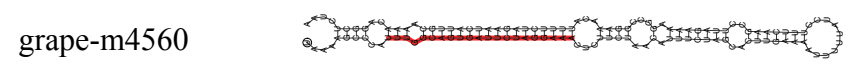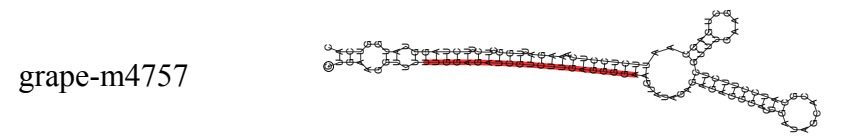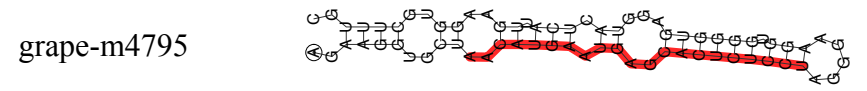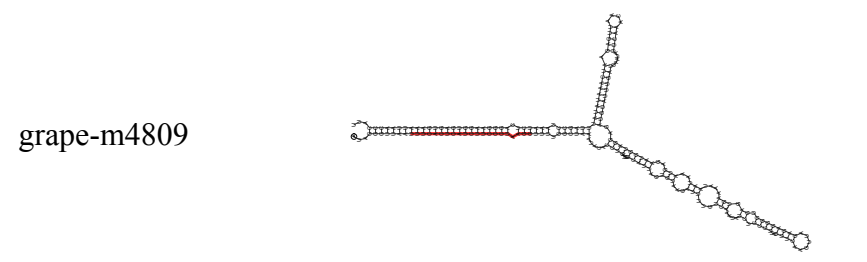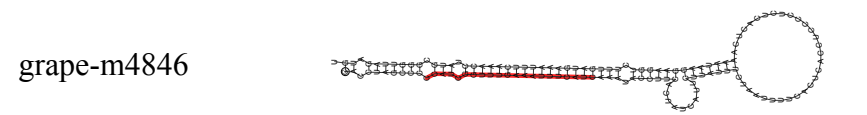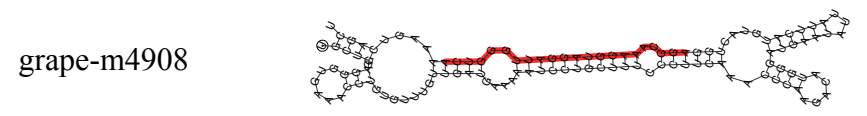

vvi-miRC5225

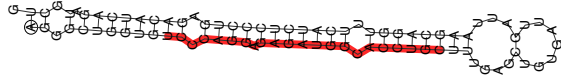

vvi-miRC530

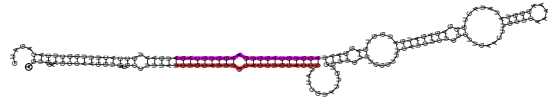

vvi-miRC530a

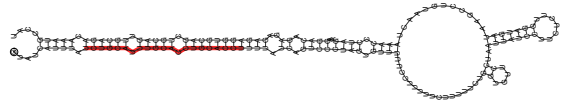

vvi-miRC535f

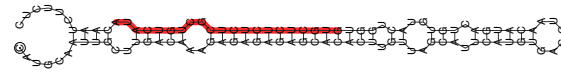

vvi-miRC535g

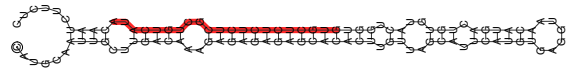

vvi-miRC7122

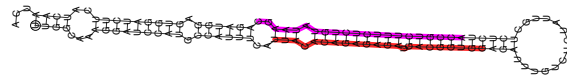

grape-m4912

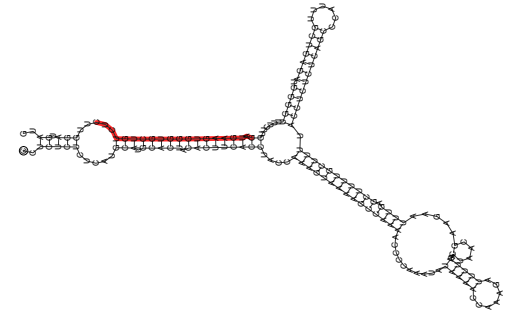

grape-m5176

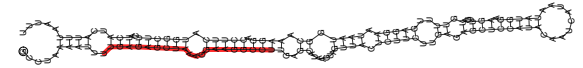

grape-m5236

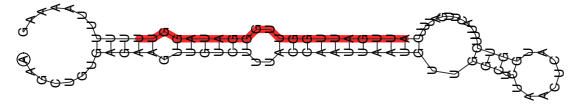

grape-m5380

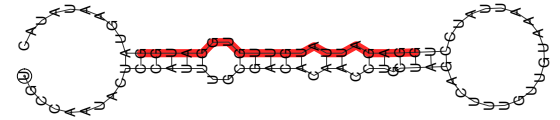

grape-m5408

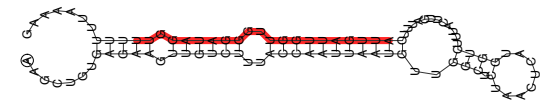

grape-m5638

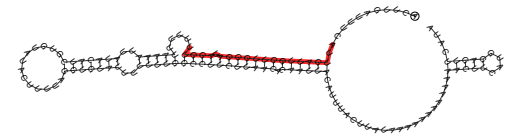

vvi-miRC827

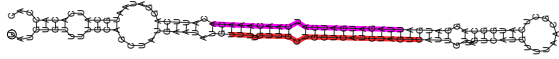

vvi-miRC171h

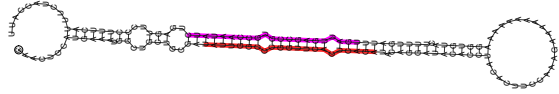

vvi-miRC171h.1

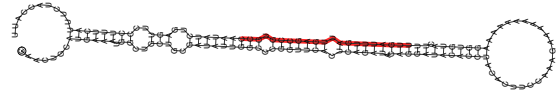

grape-m0033

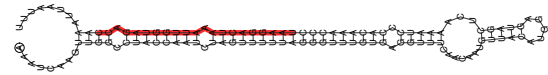

grape-m0073

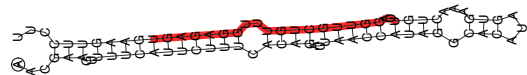

grape-m0256

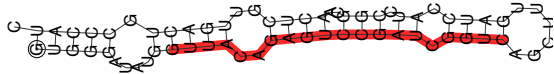

grape-m5747

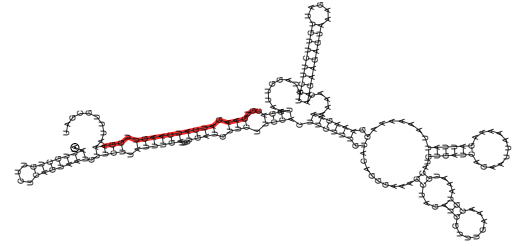

grape-m5836

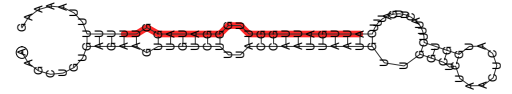

grape-m6251

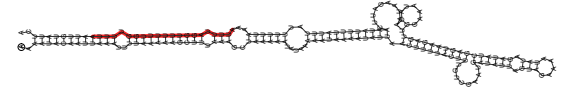

grape-m6520

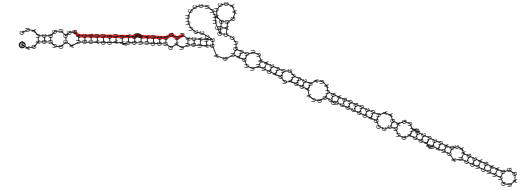

grape-m6580

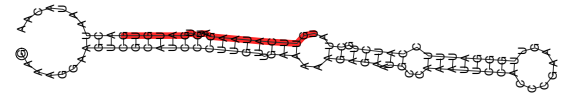

grape-m6581

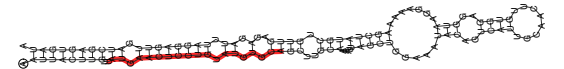

grape-m0423

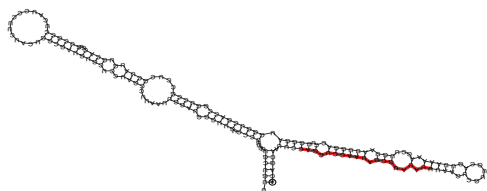

grape-m0447

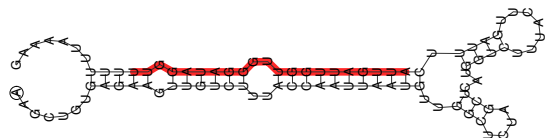

grape-m0477

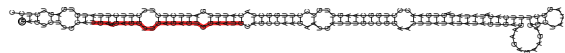

grape-m0479

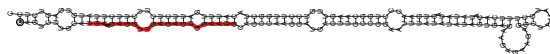

grape-m0593

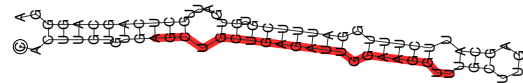

grape-m6603

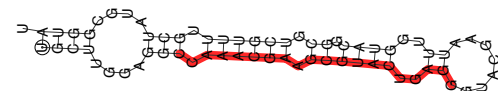

grape-m6710

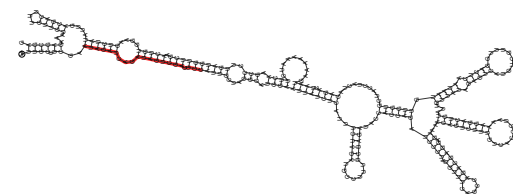

grape-m6790

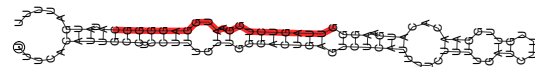

grape-m6845

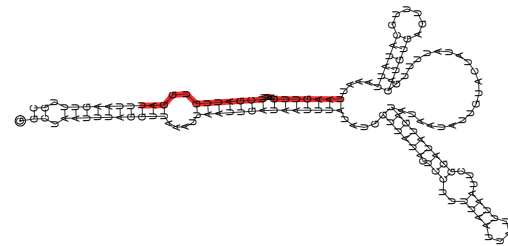

grape-m6873

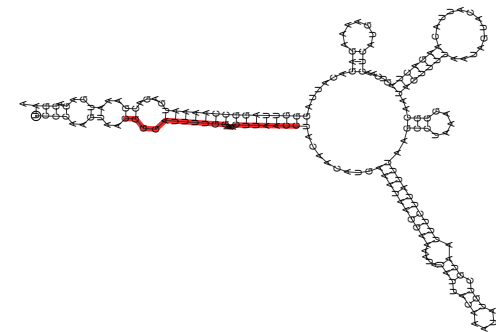

grape-m0693

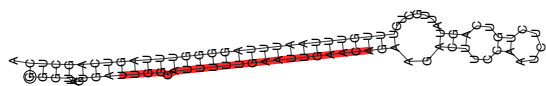

grape-m6905

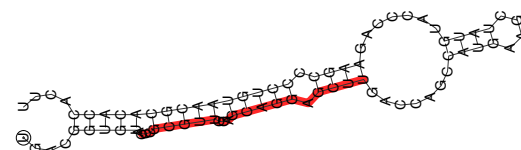

grape-m1119

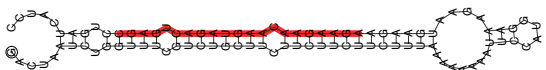

grape-m6953

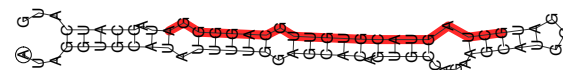

grape-m1120

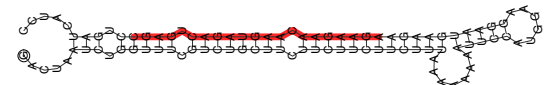

grape-m7008

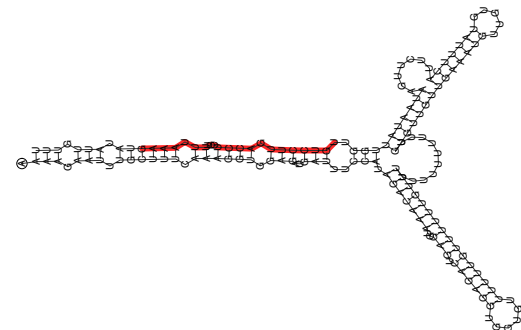

grape-m1191

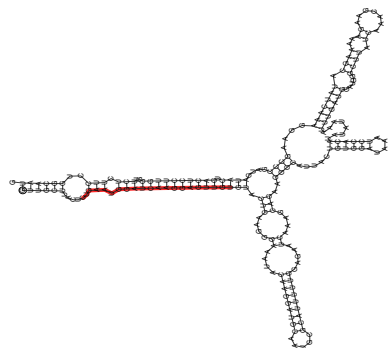

grape-m7192

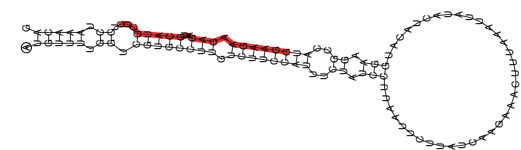

grape-m1203

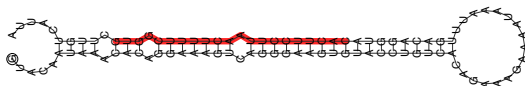

grape-m7209

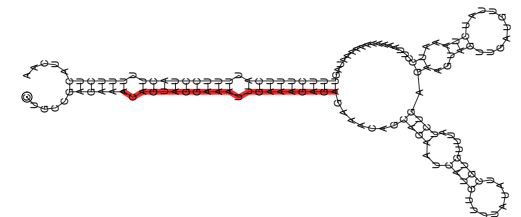

grape-m1354

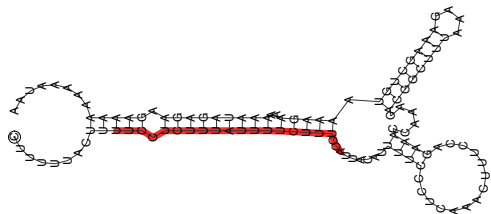

grape-m1364

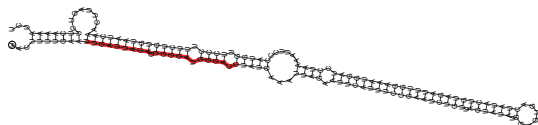

grape-m1458

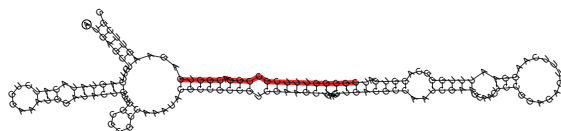

grape-m1556

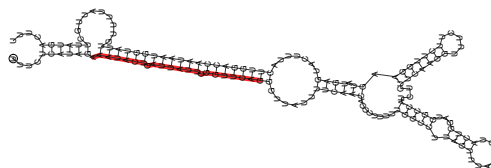

grape-m1565

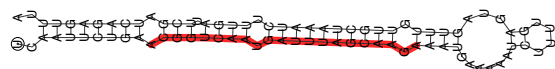

grape-m1612

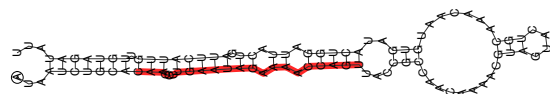

grape-m7218

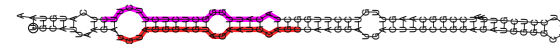

grape-m7388

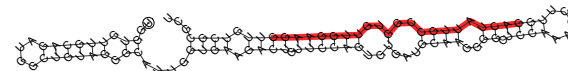

grape-m7484

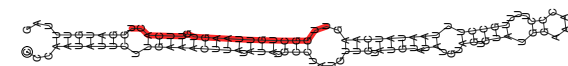

grape-m7540

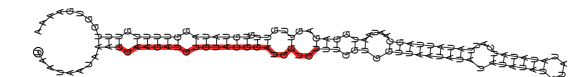

grape-m7644

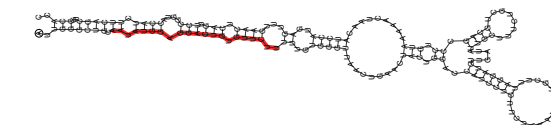

grape-m7670

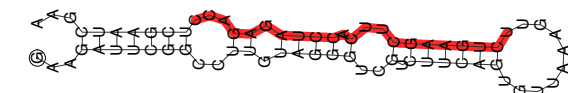



grape-m1662

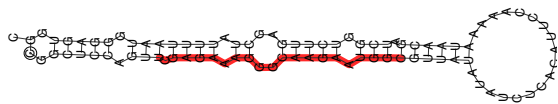

grape-m1944

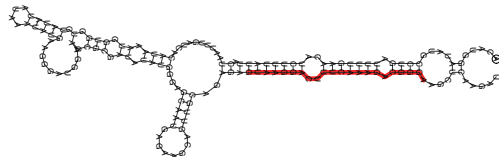

grape-m2136

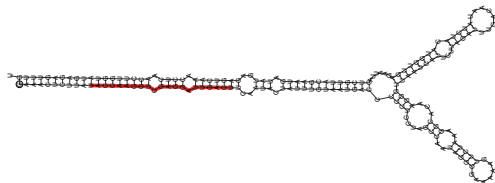

grape-m2196

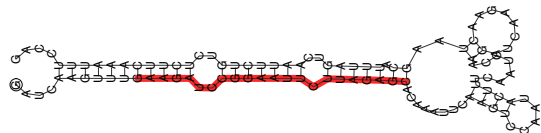

grape-m2399

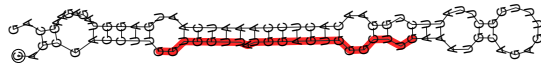

grape-m2483

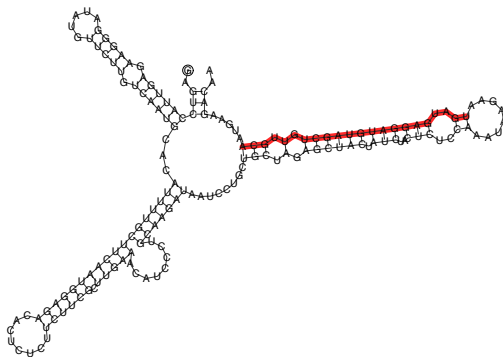

grape-m7692

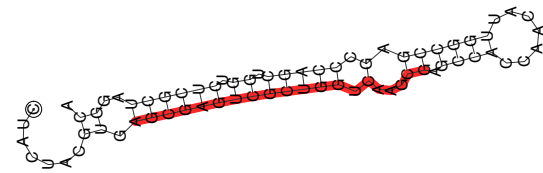

grape-m7774

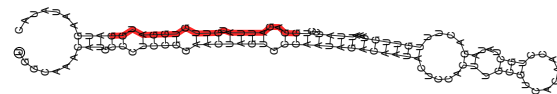

grape-m7843

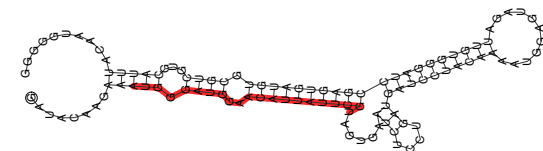

grape-m7969

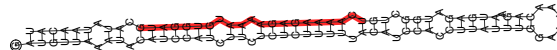

grape-m8013

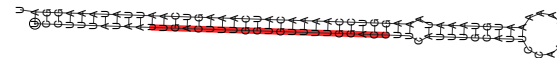

grape-m8119

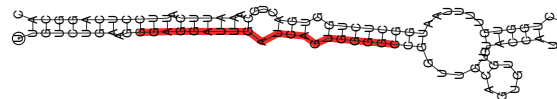

grape-m2616

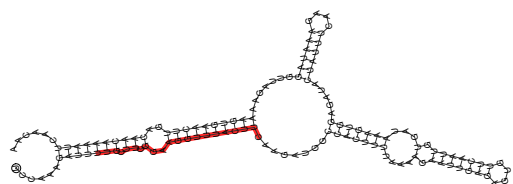

grape-m2704

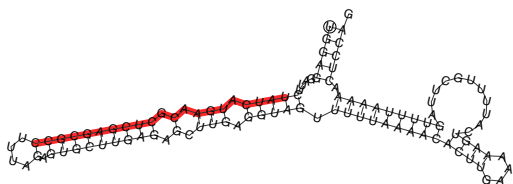

grape-m2830

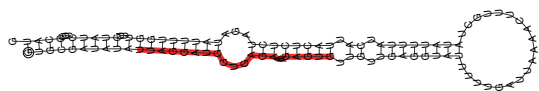

grape-m2885

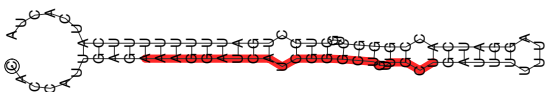

grape-m3054

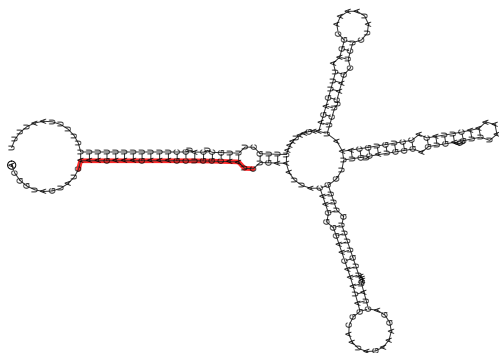

grape-m3147

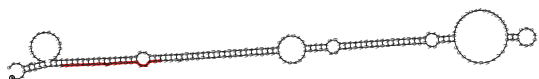

grape-m8278

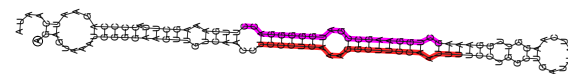

grape-m8392

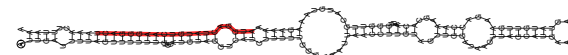

grape-m8399

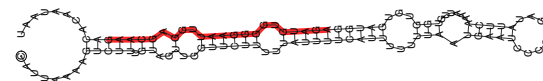

grape-m8476

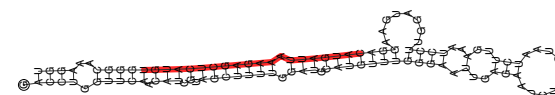

grape-m8937

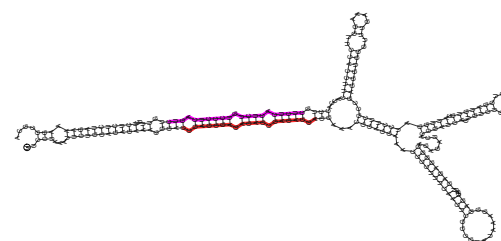

grape-m8943

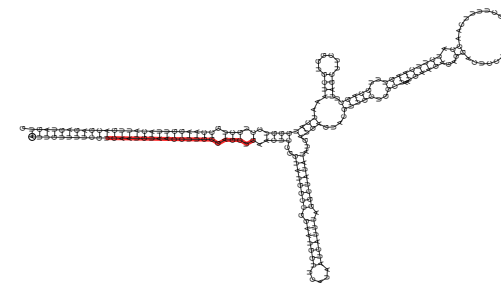

grape-m3245

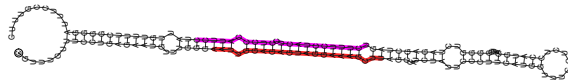

grape-m8960

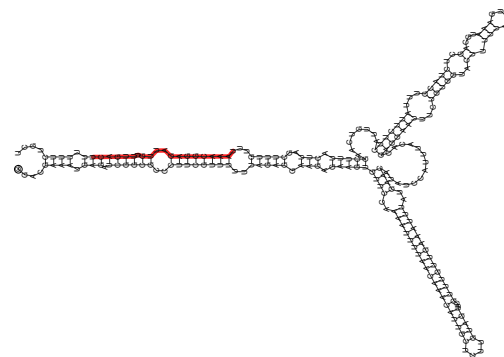

grape-m3409

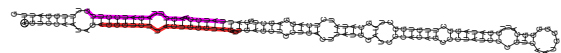

grape-m8993

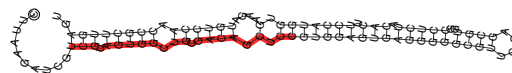

grape-m3453

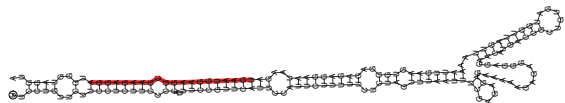

grape-m9163

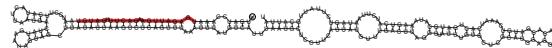

grape-m3469

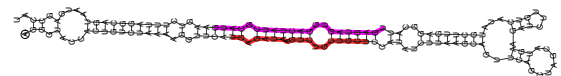

grape-m9201

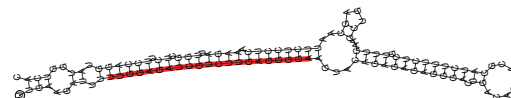

grape-m3618

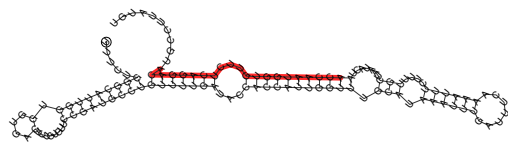

grape-m9269

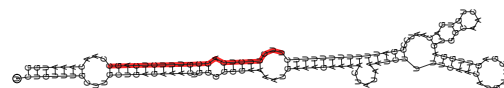

grape-m3772

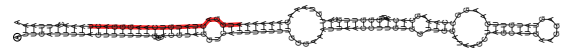

grape-m9381

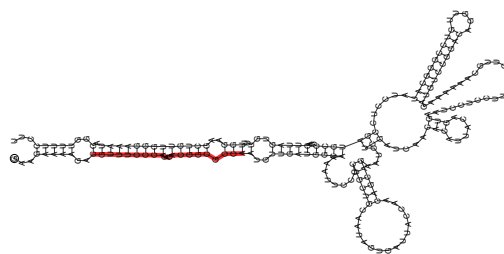

grape-m3778

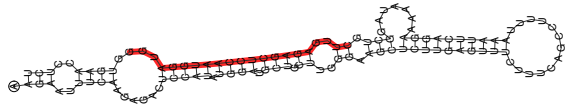

grape-m3816

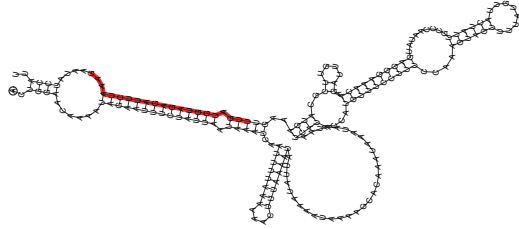

grape-m3841

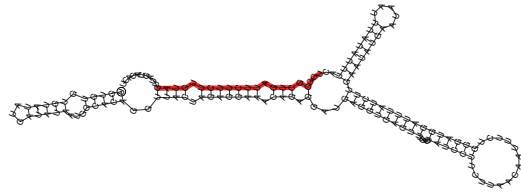

grape-m9401

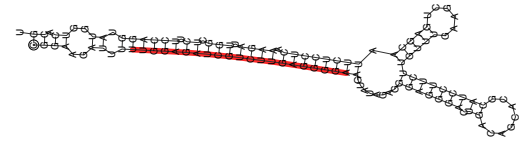

grape-m9410

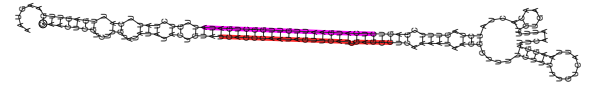

Supplement: 12864_2015_1610_MOESM6_ESM.pdf [file 12864_2015_1610_MOESM6_ESM.pdf]
