# Supplementary material for: miRVine: a microRNA expression atlas of grapevine based on small RNA sequencing
Source: PubMed Central journal article supplement (PMC4434875; doi:10.1186/s12864-015-1610-5), 2015-05-16

vvi-miRC2118

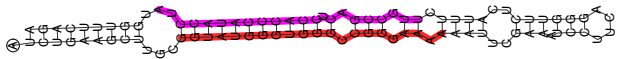

grape-m0283

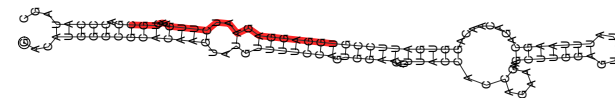

vvi-miRC3629f

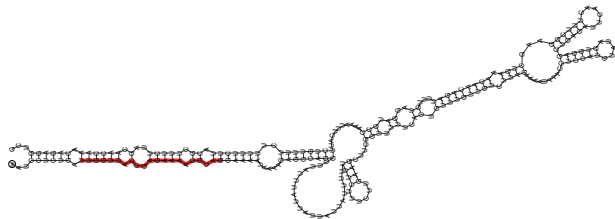

grape-m0297

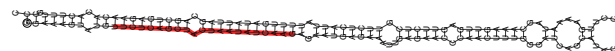

vvi-miRC3635a

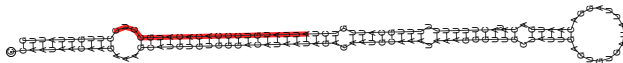

grape-m0534

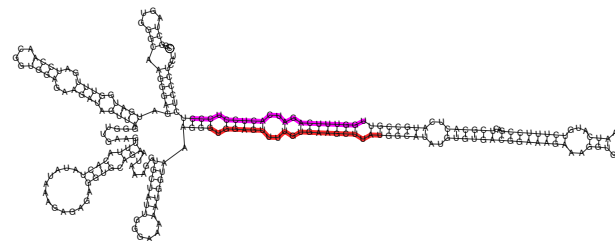

vvi-miRC391

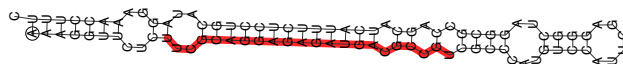

grape-m0555

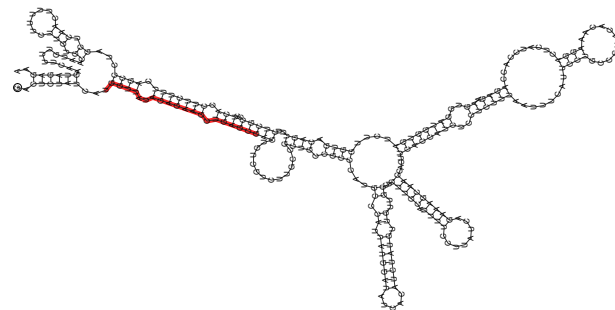

vvi-miRC399j

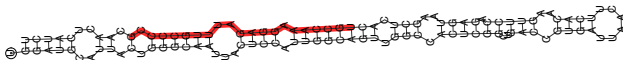

grape-m0563

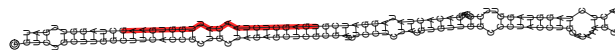

vvi-miRC482a

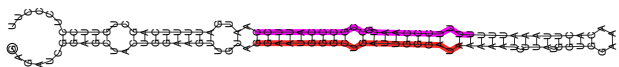

vvi-miRC5225a

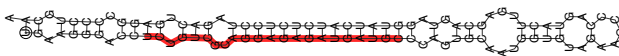

vvi-miRC529

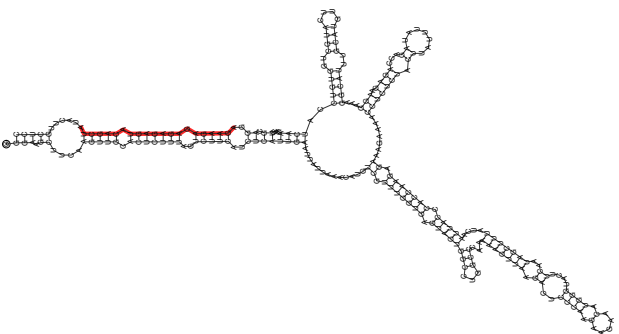

vvi-miRC535d

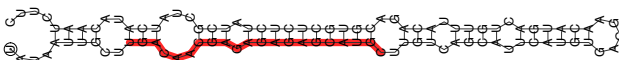

vvi-miRC535e

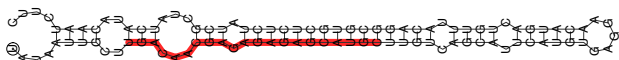

vvi-miRC535h

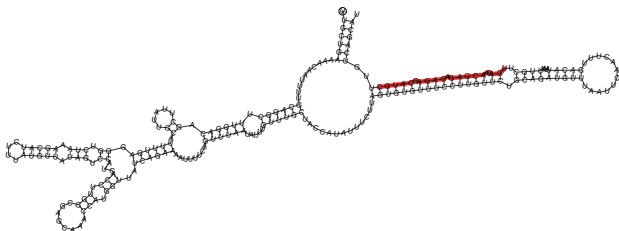

grape-m0640

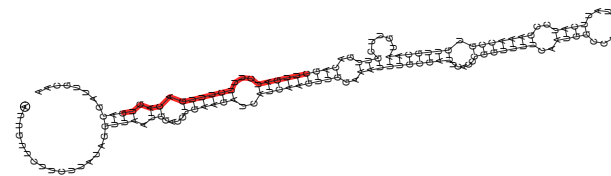

grape-m0641

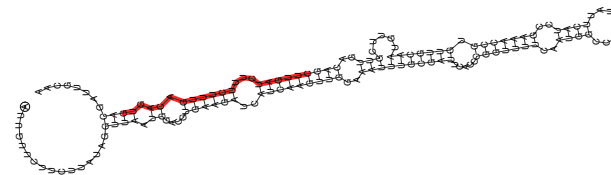

grape-m0642

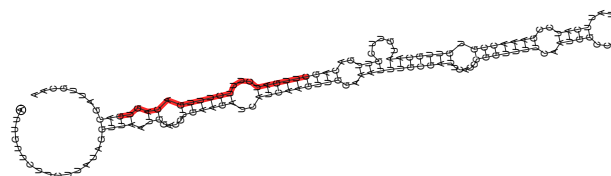

grape-m0657

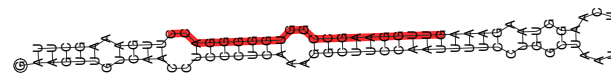

grape-m0721

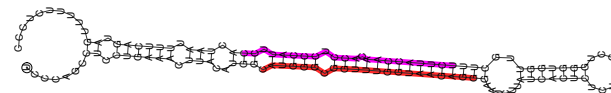

grape-m0738

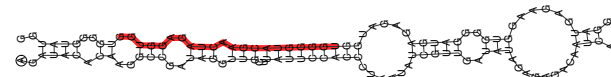

vvi-miRC535i

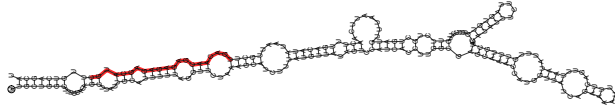

grape-m0941

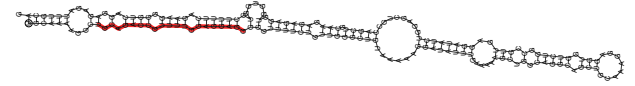

vvi-miRC535j

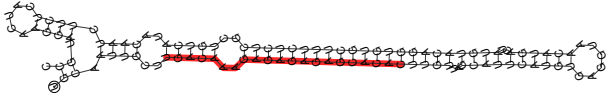

grape-m0954

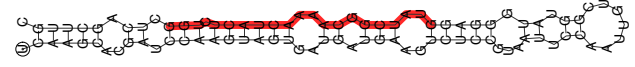

vvi-miRC535k

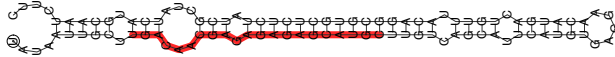

grape-m1073

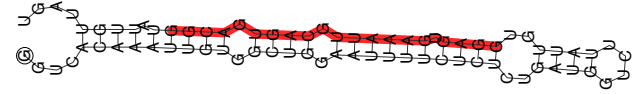

vvi-miRC771

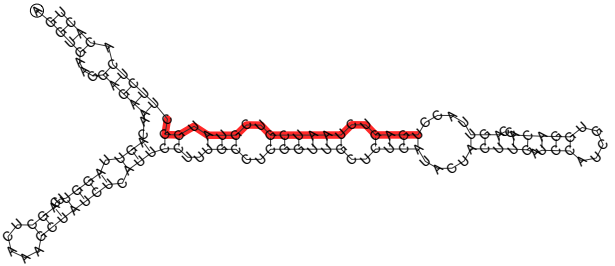

grape-m1185

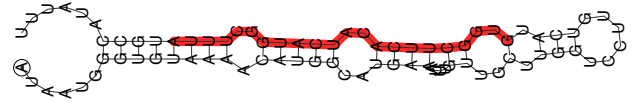

grape-m0193

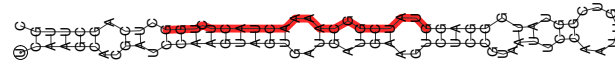

grape-m1209

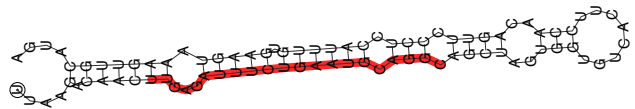

grape-m0221

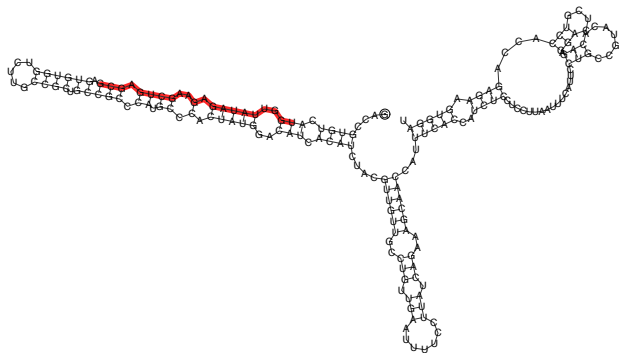

grape-m1235

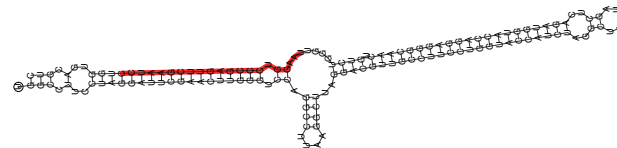

grape-m0250

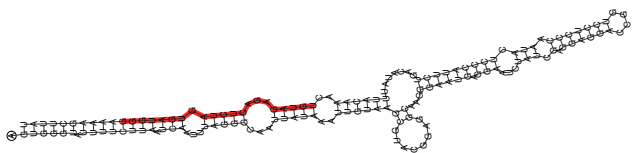

grape-m1351

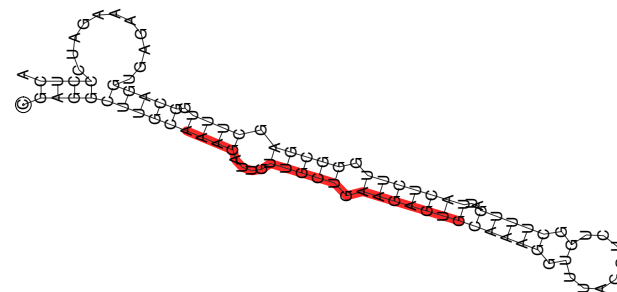

grape-m0281

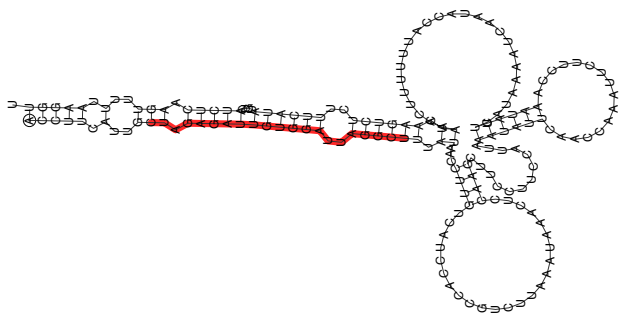

grape-m1398

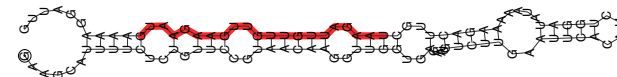

Supplement: 12864_2015_1610_MOESM7_ESM.pdf [file 12864_2015_1610_MOESM7_ESM.pdf]
