# Supplementary material for: miRVine: a microRNA expression atlas of grapevine based on small RNA sequencing
Source: PubMed Central journal article supplement (PMC4434875; doi:10.1186/s12864-015-1610-5), 2015-05-16
Supplement: 12864_2015_1610_MOESM1_ESM.pdf [file 12864_2015_1610_MOESM1_ESM.pdf]

| <b>Library<sup>a</sup></b> | <b>Total raw reads</b> | <b>Total trimmed and chopped reads<sup>b</sup></b> | <b>Genome matched reads<sup>c</sup></b> | <b>Distinct genome matched reads<sup>d</sup></b> | <b>Norm. Base Value</b> |
|----------------------------|------------------------|----------------------------------------------------|-----------------------------------------|--------------------------------------------------|-------------------------|
| Leaf_Y_1                   | 3,654,530              | 2,703,403                                          | 1,847,507                               | 45,605                                           | 5M                      |
| Leaf_Y_2                   | 14,047,558             | 10,259,599                                         | 7,076,384                               | 205,228                                          | 5M                      |
| Leaf_M_1                   | 23,919,119             | 16,781,407                                         | 10,496,403                              | 332,423                                          | 5M                      |
| Leaf_M_2                   | 11,229,400             | 7,571,706                                          | 5,080,020                               | 114,891                                          | 5M                      |
| Leaf_S_1                   | 61,913,309             | 3,561,231                                          | 961,790                                 | 44,115                                           | 5M                      |
| Leaf_S_2                   | 35,661,460             | 2,325,212                                          | 836,624                                 | 44,711                                           | 5M                      |
| Bud_AB_1                   | 24,910,567             | 16,455,864                                         | 11,887,356                              | 840,267                                          | 5M                      |
| Bud_AB_2                   | 38,002,867             | 18,178,396                                         | 11,866,561                              | 593,414                                          | 5M                      |
| Bud_W_1                    | 90,370,886             | 63,309,882                                         | 29,818,837                              | 1,219,258                                        | 5M                      |
| Bud_W_2                    | 25,103,137             | 14,378,785                                         | 5,345,542                               | 238,304                                          | 5M                      |
| Bud_L_1                    | 5,767,134              | 4,155,696                                          | 2,167,221                               | 221,768                                          | 5M                      |
| Bud_L_2                    | 12,202,177             | 9,639,987                                          | 4,903,784                               | 493,314                                          | 5M                      |
| Bud_B_1                    | 12,191,778             | 6,634,330                                          | 2,816,937                               | 411,134                                          | 5M                      |
| Bud_B_2                    | 8,216,185              | 4,928,458                                          | 2,786,044                               | 321,073                                          | 5M                      |
| Stem_G_1                   | 14,844,088             | 10,841,283                                         | 5,461,486                               | 564,999                                          | 5M                      |
| Stem_G_2                   | 11,887,764             | 9,007,741                                          | 4,597,608                               | 419,102                                          | 5M                      |
| Stem_W_1                   | 5,332,592              | 1,446,311                                          | 511,273                                 | 38,498                                           | 5M                      |
| Stem_W_2                   | 9,068,998              | 1,846,916                                          | 773,875                                 | 109,113                                          | 5M                      |
| Tendrill_Y_1               | 7,813,615              | 5,504,235                                          | 2,715,954                               | 285,216                                          | 5M                      |
| Tendrill_Y_2               | 6,006,154              | 4,020,708                                          | 2,083,571                               | 178,309                                          | 5M                      |
| Tendrill_WD_1              | 36,504,545             | 32,098,256                                         | 14,793,660                              | 1,437,853                                        | 5M                      |
| Tendrill_WD_2              | 35,079,190             | 29,829,202                                         | 14,941,857                              | 795,317                                          | 5M                      |
| Inf_Y_1                    | 8,289,504              | 6,927,349                                          | 4,151,269                               | 614,257                                          | 5M                      |
| Inf_Y_2                    | 2,445,199              | 1,798,221                                          | 1,075,373                               | 280,721                                          | 5M                      |
| Inf_WD_1                   | 17,935,860             | 14,736,534                                         | 8,784,401                               | 1,439,149                                        | 5M                      |
| Inf_WD_2                   | 16,309,663             | 12,784,241                                         | 7,364,686                               | 1,245,667                                        | 5M                      |
| Flower_FB_1                | 13,854,867             | 9,901,145                                          | 5,039,538                               | 850,752                                          | 5M                      |
| Flower_FB_2                | 15,631,539             | 10,508,193                                         | 5,477,879                               | 867,524                                          | 5M                      |
| Flower_F_1                 | 12,177,992             | 7,213,821                                          | 3,638,341                               | 496,054                                          | 5M                      |
| Flower_F_2                 | 7,482,840              | 4,469,464                                          | 2,209,586                               | 341,591                                          | 5M                      |
| Carpel_1                   | 25,519,681             | 19,151,781                                         | 12,830,932                              | 404,996                                          | 5M                      |
| Carpel_2                   | 14,926,800             | 9,839,619                                          | 5,854,619                               | 332,553                                          | 5M                      |
| Stamen_1                   | 6,075,758              | 134,009                                            | 68,939                                  | 19,341                                           | 5M                      |
| Stamen_2                   | 9,157,957              | 5,087,330                                          | 2,642,802                               | 171,886                                          | 5M                      |
| Pollen_1                   | 26,159,587             | 16,259,893                                         | 5,914,794                               | 173,807                                          | 5M                      |
| Pollen_2                   | 32,812,315             | 15,894,623                                         | 5,641,490                               | 198,145                                          | 5M                      |
| Berry_FS_1                 | 5,254,324              | 4,032,657                                          | 2,041,767                               | 366,954                                          | 5M                      |

| <b>Library<sup>a</sup></b>                     | <b>Total raw reads</b> | <b>Total trimmed and chopped reads<sup>b</sup></b> | <b>Genome matched reads<sup>c</sup></b> | <b>Distinct genome matched reads<sup>d</sup></b> | <b>Norm. Base Value</b> |
|------------------------------------------------|------------------------|----------------------------------------------------|-----------------------------------------|--------------------------------------------------|-------------------------|
| Berry_FS_2                                     | 14,124,522             | 12,342,702                                         | 7,005,085                               | 1,034,486                                        | 5M                      |
| Berry_PFS_1                                    | 8,521,962              | 5,194,406                                          | 2,367,687                               | 263,136                                          | 5M                      |
| Berry_PFS_2                                    | 12,540,245             | 5,453,367                                          | 3,204,290                               | 136,005                                          | 5M                      |
| Berry_PV_1                                     | 4,891,497              | 389,291                                            | 177,342                                 | 48,498                                           | 5M                      |
| Berry_PV_2                                     | 18,907,560             | 14,621,426                                         | 7,125,979                               | 402,872                                          | 5M                      |
| Berry_V_1                                      | 23,457,803             | 7,472,458                                          | 3,257,214                               | 275,432                                          | 5M                      |
| Berry_V_2                                      | 28,502,576             | 15,589,003                                         | 8,160,504                               | 414,250                                          | 5M                      |
| Berry_MR_1                                     | 17,067,774             | 5,681,954                                          | 2,712,130                               | 185,918                                          | 5M                      |
| Berry_MR_2                                     | 4,705,105              | 2,332,135                                          | 1,174,580                               | 78,802                                           | 5M                      |
| Berry_R_1                                      | 18,805,503             | 13,191,573                                         | 5,541,863                               | 420,900                                          | 5M                      |
| Berry_R_2                                      | 15,100,094             | 10,406,519                                         | 4,484,614                               | 299,989                                          | 5M                      |
| Berry_PHWI_1                                   | 20,626,256             | 13,443,373                                         | 8,015,033                               | 183,806                                          | 5M                      |
| Berry_PHWI_2                                   | 28,943,491             | 20,533,068                                         | 12,821,178                              | 189,743                                          | 5M                      |
| Berry_PHWII_1                                  | 31,558,460             | 19,029,491                                         | 10,657,068                              | 299,342                                          | 5M                      |
| Berry_PHWII_2                                  | 25,282,044             | 15,221,931                                         | 7,204,637                               | 330,922                                          | 5M                      |
| Berry_PHWIII_1                                 | 21,857,218             | 10,805,331                                         | 4,924,114                               | 169,996                                          | 5M                      |
| Berry_PHWIII_2                                 | 13,476,822             | 5,278,299                                          | 2,207,471                               | 117,501                                          | 5M                      |
| Rachis_FS_1                                    | 5,431,763              | 3,395,323                                          | 2,443,782                               | 88,328                                           | 5M                      |
| Rachis_FS_2                                    | 8,679,594              | 6,243,727                                          | 3,342,944                               | 475,288                                          | 5M                      |
| Rachis_PFS_1                                   | 9,966,365              | 7,452,776                                          | 3,518,223                               | 301,464                                          | 5M                      |
| Rachis_PFS_2                                   | 20,646,854             | 16,814,495                                         | 8,111,747                               | 703,561                                          | 5M                      |
| Rachis_V_1                                     | 35,803,893             | 21,536,834                                         | 10,439,751                              | 738,904                                          | 5M                      |
| Rachis_V_2                                     | 9,263,610              | 5,656,371                                          | 2,272,928                               | 139,412                                          | 5M                      |
| Rachis_MR_1                                    | 26,098,541             | 14,918,832                                         | 7,098,892                               | 492,298                                          | 5M                      |
| Rachis_MR_2                                    | 9,726,086              | 4,838,391                                          | 2,106,212                               | 183,749                                          | 5M                      |
| Rachis_R_1                                     | 20,213,091             | 8,707,116                                          | 3,918,208                               | 153,547                                          | 5M                      |
| Rachis_R_2                                     | 8,476,449              | 2,863,567                                          | 1,204,647                               | 66,783                                           | 5M                      |
| Root_1                                         | 2,338,768              | 687,381                                            | 280,394                                 | 43,743                                           | 5M                      |
| Root_2                                         | 2,309,685              | 495,593                                            | 230,058                                 | 34,156                                           | 5M                      |
| Seed_G                                         | 17,666,703             | 9,120,131                                          | 3,944,960                               | 214,301                                          | 5M                      |
| Seed_M                                         | 26,990,260             | 15,135,973                                         | 6,100,650                               | 145,549                                          | 5M                      |
| Summed Total<br>(Corvina-derived<br>libraries) | 1,219,741,533          | 709,070,325                                        | 362,560,895                             | 25,389,990                                       |                         |
| Leaf_PN <sup>e</sup>                           | 15,413,571             | 11,924,156                                         | 8,786,077                               | 1,449,032                                        | 5M                      |
| Root_PN <sup>e</sup>                           | 23,854,642             | 18,401,623                                         | 5,981,041                               | 479,536                                          | 5M                      |

| <b>Library<sup>a</sup></b>               | <b>Total raw reads</b> | <b>Total trimmed and chopped reads<sup>b</sup></b> | <b>Genome matched reads<sup>c</sup></b> | <b>Distinct genome matched reads<sup>d</sup></b> | <b>Norm. Base Value</b> |
|------------------------------------------|------------------------|----------------------------------------------------|-----------------------------------------|--------------------------------------------------|-------------------------|
| Summed Total (PN40024-derived libraries) | 39,268,213             | 30,325,779                                         | 14,767,118                              | 1,928,568                                        |                         |
| Summed Total                             | 1,259,009,746          | 739,396,104                                        | 377,328,013                             | 27,318,558                                       |                         |

<sup>a</sup> Small RNA libraries from biological replicates are indicated as “1” and “2” after the library code

<sup>b</sup> total sequences from 18 to 34 nt after trimming the adaptors

<sup>c</sup> Total number of sequences ranging from 18 to 34 nt which perfectly matched to the Grapevine genomic sequence, excluding sequences matched to structural RNAs (t/r/sn/snoRNAs) (GRAPE\_IGGP12Xv1).

<sup>d</sup> Number of genome-matched sequences which are uniquely found within the set, excluding sequences matched to structural RNAs (t/r/sn/snoRNAs).

<sup>e</sup> these libraries were prepared and sequenced using different sequencing platform and kit (Small RNA Sample Prep kit – Illumina; GAIIx Illumina Sequencer)
