# Supplementary material for: miRVine: a microRNA expression atlas of grapevine based on small RNA sequencing
Source: PubMed Central journal article supplement (PMC4434875; doi:10.1186/s12864-015-1610-5), 2015-05-16
Supplement: 12864_2015_1610_MOESM2_ESM.pdf [file 12864_2015_1610_MOESM2_ESM.pdf]

| Family | miRNA         | chr <sup>a</sup> | start <sup>a</sup> | end <sup>a</sup> | strand <sup>a</sup> | 5p sequence             | 3p sequence             | Abundance 5p <sup>b</sup> | Abundance 3p <sup>b</sup> |
|--------|---------------|------------------|--------------------|------------------|---------------------|-------------------------|-------------------------|---------------------------|---------------------------|
|        | vvi-miR156a   | 19               | 8708913            | 8709017          | -                   | TTGACAGAAGAGAGGGAGCAC   |                         | 833                       |                           |
|        | vvi-miR156b   | 4                | 5356984            | 5357115          | -                   | TGACAGAAGAGAGTGAGCAC    | GCTCATTTCTCTTTCTGTCAGC  | 43355                     | 2047                      |
|        | vvi-miR156c   | 4                | 848189             | 848322           | -                   | TGACAGAAGAGAGTGAGCAC    | GCTCACTCTCTATCTGTCATC   | 43355                     | 356                       |
|        | vvi-miR156d   | 11               | 7623202            | 7623334          | -                   | TGACAGAAGAGAGTGAGCAC    | TGCTCACCTCTCTTTCTGTCAGC | 43355                     | 4244                      |
|        | vvi-miR156e   | 11               | 1504195            | 1504301          | -                   | TGACAGAGGAGAGTGAGCAC    |                         | 302                       |                           |
|        | vvi-miR156f   | 14               | 26463671           | 26463773         | +                   | TTGACAGAAGATAGAGAGCAC   |                         | 63788                     |                           |
| miR156 | vvi-miR156g   | 17               | 3046310            | 3046441          | -                   | TTGACAGAAGATAGAGAGCAC   | GCTCTCTAGACTTCTGTCATC   | 63788                     | 4006                      |
|        | vvi-miR156i   | 14               | 19727139           | 19727358         | -                   | TTGACAGAAGATAGAGAGCAC   |                         |                           | 63788                     |
|        | vvi-miR159a   | 15               | 18469215           | 18469323         | -                   |                         | -TTGGAGTGAAGGGAGCTCTC   |                           | 1203                      |
|        | vvi-miR159c.1 | 17               | 2609190            | 2609409          | -                   | GAGCTCCTTGAAGTCCAATAG   | TTTGGATTGAAGGGAGCTCTA   | 5376                      | 3260544                   |
| miR159 | vvi-miR159c.2 | 17               | 2609190            | 2609409          | -                   | AGCTGCTGACTTATGGATCCC   | CTTGCATATCTCAGGAGCTGC   | 60183                     | 113250                    |
|        | vvi-miR160c   | 10               | 11745661           | 11745763         | +                   | TGCCTGGCTCCCTGTATGCCA   |                         | 251                       |                           |
|        | vvi-miR160d   | 8                | 13017021           | 13017120         | +                   | TGCCTGGCTCCCTGTATGCCA   |                         | 251                       |                           |
| miR160 | vvi-miR160e   | 13               | 5447916            | 5448036          | +                   | TGCCTGGCTCCCTGTATGCCA   |                         | 251                       |                           |
| miR162 | vvi-miR162    | 17               | 4716504            | 4716636          | +                   | GGATGCAGCGGTTTCATCGATC  | TCGATAAACCTCTGCATCCAG   | 328                       | 465426                    |
|        | vvi-miR164a   | 7                | 3287455            | 3287605          | -                   | TGGAGAAGCAGGGCACGTGCA   | CACGTGCTCCCCTTCTCCAAC   | 2667                      | 451                       |
|        | vvi-miR164c   | 8                | 10080445           | 10080636         | +                   | TGGAGAAGCAGGGCACGTGCA   | CATGTGCCCTCTTCCCCATC    | 2667                      | 1418                      |
| miR164 | vvi-miR164d   | 14               | 1414550            | 1414697          | -                   | TGGAGAAGCAGGGCACGTGCA   | CACGTGCTCCCCTTCTCCAAC   | 2667                      | 451                       |
|        | vvi-miR166a   | 8                | 3302784            | 3302939          | -                   | AATGAGGTTTGATCCAAGATC   | TCTCGGACCAGGCTTCATTCC   | 5392                      | 7852683                   |
|        | vvi-miR166b   | 12               | 17937384           | 17937510         | +                   | GGAATGTTGGCTGGCTCGAGG   | TCGGACCAGGCTTCATTCCCTC  | 67391                     | 97673                     |
|        | vvi-miR166c   | 15               | 16978558           | 16978745         | -                   | GGAATGTTGTCTGGCTCGAGG   | TCGGACCAGGCTTCATTCCCC   | 215923                    | 24298680                  |
|        | vvi-miR166d   | 16               | 21405202           | 21405388         | -                   | GATTGTTGTCTGGCTCGAGGC   | TCGGACCAGGCTTCATTCCCC   | 4808                      | 24298680                  |
|        | vvi-miR166e   | 2                | 2255708            | 2255901          | +                   | GGAATGTTGTCTGGCTCGAGG   | TCGGACCAGGCTTCATTCCCC   | 215923                    | 24298680                  |
|        | vvi-miR166f   | 7                | 19450000           | 19450127         | +                   | GGAATGTTGGCTGGCTCGAGG   | TCGGACCAGGCTTCATTCCCC   | 67391                     | 24298680                  |
|        | vvi-miR166g   | 7                | 453844             | 453971           | -                   | GGAATGTTGTCTGGTTTCGAGA  | TCGGACCAGGCTTCATTCCCC   | 463                       | 24298680                  |
| miR166 | vvi-miR166h   | 5                | 6741174            | 6741301          | -                   | GGAACGCTGTCTGGTTTCGAGA  | TCGGACCAGGCTTCATTCCCC   | 134                       | 24298680                  |
|        | vvi-miR167c   | Un               | 7495686            | 7495775          | +                   | TGAAGCTGCCAGCATGATCTC   |                         | 17196                     |                           |
|        | vvi-miR167d   | Un               | 7490478            | 7490622          | +                   | TGAAGCTGCCAGCATGATCT-   | GGTCATGCCCTGACAGCCTCACT | 2773                      | 87                        |
| miR167 | vvi-miR167e   | 5                | 5845370            | 5845489          | +                   | TGAAGCTGCCAGCATGATCT-   | AGATCATGTGGCAGTTTCACC   | 2773                      | 2214                      |
| miR168 | vvi-miR168    | 2                | 17944786           | 17944947         | -                   | TCGCTTGGTGCAGGTCGGGAA   | CCCGCCTTGCATCAACTGAAT   | 98080                     | 48883                     |
|        | vvi-miR169e   | 14               | 25082720           | 25082864         | -                   | TAGCCAAGGATGACTTGCCCT-- |                         | 626                       |                           |
| miR169 | vvi-miR169g   | 8                | 21104448           | 21104568         | +                   | CAGCCAAGGATGACTTGCCGA   | CCGGCAAGTTGTCTTTGGCTAC  | 11                        | 417                       |

| Family  | miRNA         | chr <sup>a</sup> | start <sup>a</sup> | end <sup>a</sup> | strand <sup>a</sup> | 5p sequence             | 3p sequence              | Abundance 5p <sup>b</sup> | Abundance 3p <sup>b</sup> |
|---------|---------------|------------------|--------------------|------------------|---------------------|-------------------------|--------------------------|---------------------------|---------------------------|
|         | vvi-miR169k   | 11               | 16108538           | 16108658         | +                   | CAGCCAAGGATGACTTGCCGG   | GGCAGGTTGTCCTTGCTACC     | 77                        | 1273                      |
|         | vvi-miR169r   | 11               | 16415128           | 16415239         | +                   | TGAGTCAAGGATGACTTGCCG   | GGCAAGTTGACTTGACTCAGT    | 4                         | 532                       |
|         | vvi-miR169t   | 11               | 16399564           | 16399676         | +                   | CGAGTCAAGGATGACTTGCCG   | GGCAAGTTGACTTGACTCAGT    | 2                         | 532                       |
|         | vvi-miR169u   | 11               | 16409398           | 16409510         | +                   | TGAGTCAAGGATGACTTGCCG   | GGCAAGTTGACTTGACTCTGT    | 4                         | 137                       |
|         | vvi-miR169w   | 14               | 29685578           | 29685790         | +                   | CAGCCAAGGATGACTTGCCGG   |                          | 77                        |                           |
|         | vvi-miR169w.1 | 14               | 29685578           | 29685790         | +                   | TGTGGGGATGAGGTTATGTGGTG | TTTCTGCCTCATCTTCTCATG    | 208                       | 386                       |
|         | vvi-miR169x   | 17               | 355697             | 355851           | -                   | TAGCCAAGGATGACTTGCCCT-  | CAGTCATTCCCTCGGCTAAACT   | 626                       | 600                       |
|         | vvi-miR171b   | 12               | 5542396            | 5542529          | -                   |                         | ---TTGAGCCGCGTCAATATCTCC |                           | 4243                      |
|         | vvi-miR171e   | 11               | 5203303            | 5203435          | +                   | CGATGTTGGTGAGGTTCAATC   | ---TTGAGCCGCGCCAATATCACT | 412                       | 903                       |
|         | vvi-miR171f   | 9                | 7012483            | 7012615          | +                   | CGATGTTGGTGAGGTTCAATC   | TTGAGCCGCGCCAATATCACT    | 412                       | 903                       |
| miR171  | vvi-miR171h   | 17               | 1828650            | 1828753          | -                   |                         | ---TTGAGCCGCGCCAATATCCCG |                           | 228                       |
|         | vvi-miR172c   | 13               | 3217492            | 3217656          | +                   | GGAGCATCATCAAGATTCACA   | GGAATCTTGATGATGCTGCAG    | 334                       | 1077                      |
| miR172  | vvi-miR172d   | 8                | 12667173           | 12667279         | +                   |                         | TGAGAATCTTGATGATGCTGC--  |                           | 2569                      |
| miR2111 | vvi-miR2111   | 8                | 15368664           | 15368748         | -                   | TAATCTGCATCCTGAGGTCTA   | GTCCTCTGGTTGCAGATACT     | 939                       | 39                        |
| miR2950 | vvi-miR2950   | 7                | 14340405           | 14340517         | +                   | ATTCCATCTCTTGCACACTGG-  | TGGTGTGCACGGGATGGAATA    | 6772                      | 866                       |
|         | vvi-miR319b   | 1                | 4189562            | 4189755          | +                   |                         | TTGGACTGAAGGGAGCTCCC-    |                           | 538637                    |
|         | vvi-miR319c   | 2                | 855548             | 855756           | -                   | AGAGCTTTCTTCAGTCCACTC   | TTGGACTGAAGGGAGCTCCC-    | 754                       | 538637                    |
|         | vvi-miR319e   | 11               | 4317223            | 4317329          | +                   |                         | TTTGGACTGAAGGGAGCTCCT    |                           | 74092                     |
|         | vvi-miR319f   | 6                | 9137286            | 9137416          | +                   | AGCTGCCGACTCATTCAATCA   | TTGGACTGAAGGGAGCTCCC-    | 1226                      | 538637                    |
| miR319  | vvi-miR319g   | 17               | 3675979            | 3676209          | -                   |                         | TTGGACTGAAGGGAGCTCCC-    |                           | 538637                    |
| miR3623 | vvi-miR3623   | 18               | 24650004           | 24650148         | +                   | TCACAAGTTCATCCAAGCACCA  | TGGTGCTTGACGAATTTGCT     | 123542                    | 24390                     |
| miR3624 | vvi-miR3624   | 8                | 2139181            | 2139402          | -                   | TAGTATGCTGCTGTCTTTAGA   | TCAGGGCAGCAGCATACTACT    | 43                        | 11606                     |
| miR3625 | vvi-miR3625   | 17               | 2378212            | 2378319          | -                   | TTCCAGCAGTCATCTCCAAGG   | CGGGAGATGACTACTGGAAGC    | 85                        | 1628                      |
| miR3627 | vvi-miR3627   | 14               | 28302559           | 28302681         | -                   | TTGTCGCAGGAGAGACGGCACT  | TCGCCGCTCTCCTGTGACAAG    | 2119                      | 5705                      |
| miR3628 | vvi-miR3628   | 13               | 16716076           | 16716181         | -                   | ATGCGAGAGCCGTGCTTAGTA   | CTAAGCACAGTCTCGCATCC     | 125                       | 799                       |
|         | vvi-miR3629a  | 13               | 18253987           | 18254170         | +                   | CGCATTCTTCAGCAGCCAAG    | TGGCTGCTGAGAAAATGTAGG-   | 27                        | 1912                      |
| miR3629 | vvi-miR3629c  | 17               | 822209             | 822338           | +                   | TGGCTGCTGAGAAAATGTAGG-  |                          | 1912                      |                           |
| miR3632 | vvi-miR3632   | 14               | 23394889           | 23395015         | +                   | GGATTGGGGGCCGATGGAAAGG  | TTCCCAGACCCCAATACCAA     | 5399                      | 4088                      |
|         | vvi-miR3633a  | 17               | 5521913            | 5522060          | +                   | GGAATGGATGGTTAGGAGAG    | TTCCTATAACCACCCATTCCCTA  | 102848                    | 5952                      |
| miR3633 | vvi-miR3633b  | 17               | 5521557            | 5521691          | +                   | GGAATGGGTGGCTGGGATCT-   | GTTCCCATGCCATCCATTCCCTA  | 15449                     | 3499                      |
| miR3634 | vvi-miR3634   | 17               | 5681202            | 5681314          | -                   | GGCATATGTGTGACGGAAAGA   | TTTCCGACTCGACTCATGCCGT   | 1695                      | 7058807                   |
| miR3635 | vvi-miR3635   | 18               | 27357610           | 27357786         | +                   | GGCATGTGTGGGCATAATAG    | ATTATGTCCACACATGCCTC     | 1231                      | 2099                      |

| Family  | miRNA         | chr <sup>a</sup> | start <sup>a</sup> | end <sup>a</sup> | strand <sup>a</sup> | 5p sequence               | 3p sequence              | Abundance 5p <sup>b</sup> | Abundance 3p <sup>b</sup> |
|---------|---------------|------------------|--------------------|------------------|---------------------|---------------------------|--------------------------|---------------------------|---------------------------|
| miR3637 | vvi-miR3637   | 16               | 20659663           | 20659834         | -                   | ATTTATGTATTGTGTTTTGTTCGGA | TTTCGACAAGACACAATGCATAAA | 488                       | 111                       |
|         | vvi-miR3639   | 9                | 21823045           | 21823186         | +                   | ATTGACTTCTGAAAGGCTAAAAGC  | GAGCTTTTGGCTTCTCAGAAGTCA | 808                       | 269                       |
| miR3639 | vvi-miR3639.1 | 9                | 21823045           | 21823186         | +                   | AACCTGTTTGGATTGACTTCTGAA  | TCAGAAGTCAATCCAAACAAGGTC | 3                         | 8                         |
| miR3640 | vvi-miR3640   | 16               | 11986830           | 11987020         | +                   | ACCTGATTGGTGATGCTTTTTTGG  | ATCGAAAAGGCATCATCAATCAGG | 3925                      | 1684                      |
| miR390  | vvi-miR390    | 6                | 8159504            | 8159673          | +                   | AAGCTCAGGAGGGATAGCGCC     | CGCTATCTATCCTGAGTTTCA    | 38339                     | 189                       |
|         | vvi-miR393a   | 16               | 17247172           | 17247327         | -                   | TCCAAAGGGATCGCATTGATC     | ATCATGCTATCCCTTAGGAAC    | 13555                     | 649                       |
| miR393  | vvi-miR393b   | 13               | 4265132            | 4265213          | +                   | TCCAAAGGGATCGCATTGATC     |                          | 13555                     |                           |
| miR394  | vvi-miR394c   | 18               | 3551261            | 3551361          | -                   | TTGGCATTCTGTCCACCTCC--    |                          | 6417                      |                           |
|         | vvi-miR395a   | 1                | 6527921            | 6528019          | +                   |                           | CTGAAGTGTGTTGGGGGAACTC   |                           | 11329                     |
|         | vvi-miR395c   | 1                | 6499899            | 6500020          | -                   | GTTCCCTTGACCACTTCACTG     | CTGAAGTGTGTTGGGGGAACTC   | 1316                      | 11329                     |
|         | vvi-miR395d   | 1                | 6512760            | 6512848          | +                   |                           | CTGAAGTGTGTTGGGGGAACTC   |                           | 11329                     |
|         | vvi-miR395e   | 1                | 6505233            | 6505354          | +                   | GTTCCCTTGACCACTTCACTG     | CTGAAGTGTGTTGGGGGAACTC   | 1316                      | 11329                     |
|         | vvi-miR395f   | 1                | 6489527            | 6489642          | +                   | GTTCCCTTGACCACTTCACTG     | CTGAAGTGTGTTGGGGGAACTC   | 1316                      | 11329                     |
|         | vvi-miR395g   | 1                | 6482098            | 6482213          | +                   | GTTCCCTTGAGCACTTCAATTG    | CTGAAGTGTGTTGGGGGAACTC   | 194                       | 11329                     |
|         | vvi-miR395h   | 1                | 6566637            | 6566758          | +                   | GTTCCCTTGACCACTTCACTG     | CTGAAGTGTGTTGGGGGAACTC   | 1316                      | 11329                     |
|         | vvi-miR395i   | 1                | 6562627            | 6562742          | +                   | GTTCCCTTGACCACTTCACTG     | CTGAAGTGTGTTGGGGGAACTC   | 1316                      | 11329                     |
|         | vvi-miR395j   | 1                | 6553011            | 6553126          | +                   | GTTCCCTTGACCACTTCACTG     | CTGAAGTGTGTTGGGGGAACTC   | 1316                      | 11329                     |
|         | vvi-miR395k   | 1                | 6536764            | 6536885          | +                   | GTTCCCTTGACCACTTCACTG     | CTGAAGTGTGTTGGGGGAACTC   | 1316                      | 11329                     |
|         | vvi-miR395l   | 1                | 6559083            | 6559199          | +                   | GTTCCCTTGACCACTTCACTG     | CTGAAGTGTGTTGGGGGAACTC   | 1316                      | 11329                     |
| miR395  | vvi-miR395n   | 17               | 6408994            | 6409134          | -                   |                           | -TGAAGAGTCTGGAGGAACTCT   |                           | 43                        |
|         | vvi-miR396a   | 9                | 7372506            | 7372649          | -                   | TTCCACAGCTTTCTTGAAGT-     | GCTCAAGAAAGCTGTGGGAGG    | 35942                     | 3217                      |
|         | vvi-miR396b   | 11               | 5246778            | 5246913          | +                   | TTCCACAGCTTTCTTGAAGT      | GTTCAAGAAAGCTGTGGGAAA    | 120399                    | 5334                      |
|         | vvi-miR396c   | 4                | 5119576            | 5119713          | -                   | TTCCACAGCTTTCTTGAAGT      | GCTCAGGAAAGTTGTGGAACA    | 104918                    | 798                       |
| miR396  | vvi-miR396d   | 11               | 5253095            | 5253244          | -                   | TTCCACAGCTTTCTTGAAGT      | GTTCAATAAAGCTGTGGGAAAG   | 104918                    | 9615                      |
| miR397  | vvi-miR397a   | Un               | 11971875           | 11972030         | -                   | TCATTGAGTGCAGCGTTGATG     | TTGGCGCTGCACTCAATCATG    | 13817                     | 8008                      |
|         | vvi-miR398a   | 1                | 731589             | 731729           | +                   | CAAGGGAGTGGCACCTGAGAACA   | ----TTCTCAGGTCACCCCTTGGG | 382                       | 203                       |
|         | vvi-miR398b   | 6                | 16503529           | 16503646         | -                   | GGTGTGACCTGAGAATCACATG    | TGTGTTCTCAGGTCGCCCTG     | 242                       | 284479                    |
| miR398  | vvi-miR398c   | 6                | 15575566           | 15575683         | +                   | GGAGTGACCTGAGAATCACATG    | TGTGTTCTCAGGTCGCCCTG     | 225                       | 284479                    |
|         | vvi-miR399a   | 10               | 2989448            | 2989546          | +                   |                           | TGCCAAAGGAGAATTGCCCTG    |                           | 193                       |
|         | vvi-miR399b   | 16               | 15618693           | 15618839         | -                   | GGGCACCTCTTTCTTGGCAG      | TGCCAAAGGAGAGTTGCCCTG    | 53                        | 819                       |
|         | vvi-miR399c   | 15               | 15232197           | 15232281         | +                   |                           | TGCCAAAGGAGAGTTGCCCTG    |                           | 819                       |
| miR399  | vvi-miR399h   | 10               | 2983543            | 2983634          | +                   |                           | TGCCAAAGGAGAATTGCCCTG    |                           | 193                       |

| Family | miRNA       | chr <sup>a</sup> | start <sup>a</sup> | end <sup>a</sup> | strand <sup>a</sup> | 5p sequence              | 3p sequence            | Abundance 5p <sup>b</sup> | Abundance 3p <sup>b</sup> |
|--------|-------------|------------------|--------------------|------------------|---------------------|--------------------------|------------------------|---------------------------|---------------------------|
|        | vvi-miR399i | 2                | 4101798            | 4101922          | +                   |                          | CGCCAAAGGAGAGTTGCCCTG  |                           | 6558                      |
|        | vvi-miR403a | 5                | 65232              | 65376            | +                   | AGTTTGTGCGTGAATCAAACC    | TTAGATTCACGCACAAACTCG  | 136                       | 200843                    |
|        | vvi-miR403b | 5                | 600176             | 600266           | +                   |                          | TTAGATTCACGCACAAACTCG  |                           | 200843                    |
|        | vvi-miR403d | 5                | 166477             | 166567           | +                   |                          | TTAGATTCACGCACAAACTCG  |                           | 200843                    |
|        | vvi-miR403e | 5                | 168084             | 168228           | +                   | AGTTTGTGCGTGAATCAAACC    | TTAGATTCACGCACAAACTCG  | 136                       | 200843                    |
| miR403 | vvi-miR403f | 7                | 4179658            | 4179795          | -                   | AGTTTGTGCGTGACTCTAAAA    | TTAGATTCACGCACAAACTCG  | 2675                      | 200843                    |
| miR408 | vvi-miR408  | 7                | 5011920            | 5012056          | +                   | CGGGGACGAGGTAGTGCATGG    | ATGCACTGCCTCTTCCCTGGC  | 24612                     | 63260                     |
|        | vvi-miR477  | 1                | 22740264           | 22740350         | +                   | ---TCCCTCAAAGGCTTCCAATTT |                        | 409                       |                           |
| miR477 | vvi-miR477b | 2                | 1237529            | 1237808          | +                   | ACTCTCCTCAAGGGCTTCTG-    | CGAAGTCTTTGGGGAGAGTGG  | 237                       | 1512                      |
| miR479 | vvi-miR479  | 16               | 21573744           | 21573866         | +                   | TGTGGTATTGGTTCCGGCTCATC  | CGAGCCGAACCAATATCACTC  | 8385                      | 57764                     |
| miR482 | vvi-miR482  | 1                | 3865560            | 3865686          | +                   | CATGGGCGGTTTGGTAAGAGG    | TCTTACCAACACCTCCCATTCC | 415921                    | 127869                    |
|        | vvi-miR535a | 7 random         | 1392238            | 1392368          | -                   | TGACAACGAGAGAGAGCACGC    | GTGCTCTCTCTCGCTGTCATA  | 24425                     | 197                       |
|        | vvi-miR535b | Un               | 25369688           | 25369818         | -                   | TGACAACGAGAGAGAGCACGC    | GTGCTCTCTCTCGCTGTCATA  | 24425                     | 197                       |
| miR535 | vvi-miR535c | 7 random         | 1346353            | 1346483          | -                   | TGACAACGAGAGAGAGCACGC    | GTGCTCTCTGTCGCTGTCATA  | 24425                     | 197                       |

<sup>a</sup> Refers to the genomic localization on the GRAPE\_IGGP12Xv1 genome sequence

<sup>b</sup> Sum of TP5M values from 68 libraries

- Missing nucleotides

Nucleotides that differ from the annotated sequence are shown in red.

Newly annotated miRNA are shown in blue.
