# Supplementary material for: miRVine: a microRNA expression atlas of grapevine based on small RNA sequencing
Source: PubMed Central journal article supplement (PMC4434875; doi:10.1186/s12864-015-1610-5), 2015-05-16
Supplement: 12864_2015_1610_MOESM4_ESM.pdf [file 12864_2015_1610_MOESM4_ESM.pdf]

| miRNA name     | chr <sup>a</sup> | start <sup>a</sup> | end <sup>a</sup> | strand <sup>a</sup> | 5p sequence             | nt <sup>b</sup> | 3p sequence            | nt <sup>b</sup> | Abundance 5p <sup>c</sup> | Abundance 3p <sup>c</sup> |
|----------------|------------------|--------------------|------------------|---------------------|-------------------------|-----------------|------------------------|-----------------|---------------------------|---------------------------|
| vvi-miRC1446*  | 14               | 24560621           | 24560731         | -                   | TCTGAACTCTCTCCCTCATGGC  | 22              |                        |                 | 1134                      |                           |
| vvi-miRC159d   | 15               | 18461450           | 18461639         | -                   |                         |                 | TTTGGTTTGAAGGGAGCTCT   | 20              |                           | 125                       |
| vvi-miRC159e   | 15               | 18466298           | 18466488         | -                   |                         |                 | TTTGGTTTGAAGGGAGCTCT   | 20              |                           | 125                       |
| vvi-miRC159f   | 15               | 18473287           | 18473482         | -                   |                         |                 | TTGGAGTGAAGGGAGCTCTA   | 20              |                           | 2722                      |
| vvi-miRC166i*  | 7                | 19450158           | 19450352         | +                   | GGAATGTTGTCTGGCTCGAGG   | 21              | TCGGACCAGGCTTCATTCCCC  | 21              | 215923                    | 24298680                  |
| vvi-miRC171j   | 18               | 1502294            | 1502428          | +                   |                         |                 | TGATTGAGCCGTGCCAATATC  | 21              |                           | 1390                      |
| vvi-miRC171h   | Un               | 19112172           | 19112315         | +                   | TATTGGCCCCGGTTCACCTCAGA | 21              | TGATTGAGCCGTGCCAATATC  | 21              | 48174                     | 1390                      |
| vvi-miRC171h.1 | Un               | 19112172           | 19112315         | +                   |                         |                 | TTGATTTGATTGAGCCGTGCC  | 21              |                           | 15468                     |
| vvi-miRC172e*  | 13               | 6181355            | 6181500          | -                   | GTAGCATCATCAAGATTCACA   | 21              | TGAGAATCTTGATGATGCTGC  | 21              | 161                       | 2569                      |
| vvi-miRC172f*  | 6                | 17652397           | 17652534         | -                   | GTAGCATCATCAAGATTCACA   | 21              | TGAGAATCTTGATGATGCTGC  | 21              | 161                       | 2569                      |
| vvi-miRC2275   | 1                | 11721643           | 11721752         | -                   |                         |                 | TTTAGTTTCCTCCAATATCTCA | 22              |                           | 48                        |
| vvi-miRC2275a  | 14               | 29265081           | 29265177         | -                   | AGAATTGGAGGATAGCAAACA   | 21              |                        |                 | 69                        |                           |
| vvi-miRC3627a  | 14               | 28619565           | 28619652         | +                   | TTGCCGCACGAGAGATGGCACC  | 22              |                        |                 | 572                       |                           |
| vvi-miRC3629d  | 14               | 3031591            | 3031773          | +                   | TGGCTGCTGAGAAAATGTAGG   | 21              |                        |                 | 1912                      |                           |
| vvi-miRC3629e  | 19               | 10543925           | 10544090         | -                   | TGTTTGGTTGTCGAGAAAATG   | 21              |                        |                 | 162                       |                           |
| vvi-miRC390a*  | 8                | 9571397            | 9571544          | +                   | AAGCTCAGGAGGGATAGCGCC   | 21              | CGCTATCCATCCTGAGTTTC   | 20              | 38339                     | 1096                      |
| vvi-miRC396e*  | 1                | 1997798            | 1998004          | +                   | TTCCACGGCTTTCTTGAAGCTT  | 21              | TTCAAGAAAGCCGTGGGAAAA  | 21              | 74082                     | 1446                      |
| vvi-miRC477c*  | 19               | 12889963           | 12890080         | +                   | TCCCTCAAAGGCTTCCAATTT   | 21              | GTTGGAAGCCGGTGGGGGACC  | 21              | 409                       | 27451                     |
| vvi-miRC477d*  | 19               | 13141671           | 13141788         | +                   | TCCCTCAAAGGCTTCCAATTT   | 21              | GTTGGAAGCCGGTGGGGGACC  | 21              | 409                       | 27451                     |
| vvi-miRC477e*  | 19               | 13510093           | 13510210         | +                   | TCCCTCAAAGGCTTCCAATTT   | 21              | GTTGGAAGCCGGTGGGGGACC  | 21              | 409                       | 27451                     |
| vvi-miRC477f*  | 19               | 18678338           | 18678455         | +                   | TCCCTCAAAGGCTTCCAATTT   | 21              | GTTGGAAGTTCGGTGGGGGAAC | 21              | 409                       | 23526                     |
| vvi-miRC477g*  | 19               | 18881351           | 18881468         | -                   | TCCCTCAAAGGCTTCCAATTT   | 21              | GTTGGAAGCCGGTGGGGGACC  | 21              | 409                       | 27451                     |
| vvi-miRC477h   | Un               | 16672963           | 16673080         | -                   | TCCCTCAAAGGCTTCCAATTT   | 21              | GTTGGAAGCCGGTGGGGGACC  | 21              | 409                       | 27451                     |
| vvi-miRC5225   | 17               | 5928104            | 5928188          | +                   | TCCCAGGAGAGATGGCACCTGC  | 22              |                        |                 | 496                       |                           |
| vvi-miRC530*   | 6                | 17896112           | 17896288         | +                   | TCTGCATTTGCACCTGCACCT   | 21              | AGGTGCAGGTGAAGGTGCAGA  | 21              | 10586                     | 567                       |
| vvi-miRC530a   | 8                | 18999725           | 18999889         | -                   | TCTGCATTTGCACCTGCACCT   | 21              |                        |                 | 10586                     |                           |
| vvi-miRC535f   | Un               | 10281947           | 10282060         | -                   | TGACAAAGAGAGAGACACT     | 22              | GTGCTCTCTCTCGCTGTCATA  | 21              | 19                        | 197                       |
| vvi-miRC535g   | Un               | 11733968           | 11734081         | +                   | TGACAAAGAGAGAGACACT     | 22              | GTGCTCTCTCTCGCTGTCATA  | 21              | 19                        | 197                       |
| vvi-miRC7122   | 5                | 6820719            | 6820833          | -                   | TTACACAGAGAGATGACGGTGG  | 22              | ACCGTCTTTCTCTGTATAAGC  | 21              | 1617                      | 1906                      |
| vvi-miRC827*   | 5                | 24742113           | 24742240         | -                   | TTTTGTTGCTGGTCATCTAGTC  | 21              | TTAGATGATCATCAACAAACA  | 21              | 6996                      | 14564                     |
| grape-m0033    | 10               | 4660930            | 4661046          | +                   |                         |                 | TAAGGACTAAATTGGTAGACC  | 21              |                           | 1671                      |
| grape-m0073    | 10               | 9062839            | 9062920          | +                   |                         |                 | TTAGGTTGCTGTTTGGAGAGT  | 21              |                           | 348                       |

| miRNA name   | chr <sup>a</sup> | start <sup>a</sup> | end <sup>a</sup> | strand <sup>a</sup> | 5p sequence            | nt <sup>b</sup> | 3p sequence            | nt <sup>b</sup> | Abundance 5p <sup>c</sup> | Abundance 3p <sup>c</sup> |
|--------------|------------------|--------------------|------------------|---------------------|------------------------|-----------------|------------------------|-----------------|---------------------------|---------------------------|
| grape-m0256  | 10               | 11642347           | 11642413         | -                   | GTTACAGAGTCCGATCGGTC   | 20              |                        |                 | 84                        |                           |
| grape-m0423  | 11               | 10360043           | 10360216         | +                   | CAGCTCCAATAGCGTATATT   | 20              |                        |                 | 41                        |                           |
| grape-m0447  | 11               | 14373348           | 14373442         | +                   |                        |                 | ATTGATTGGTTGGGATAGGTT  | 21              |                           | 96                        |
| grape-m0477  | 11               | 16106464           | 16106625         | +                   | TGAAGAGGTTGAGAGTGGAATG | 22              |                        |                 | 468                       |                           |
| grape-m0479  | 11               | 16112952           | 16113113         | +                   | TGAAGAGGTTGAGAGTGGAATG | 22              |                        |                 | 468                       |                           |
| grape-m0593  | 11               | 9977583            | 9977656          | -                   | AGCTGCTGAGATTGGAAGGTT  | 21              |                        |                 | 43                        |                           |
| grape-m0693  | 12               | 1561898            | 1561988          | +                   | TTGGGATTTTTGAATTGAACA  | 21              |                        |                 | 88                        |                           |
| grape-m1119* | 12               | 19456317           | 19456411         | -                   |                        |                 | AGAAGAACAAGTAGACTGAGC  | 21              |                           | 1067                      |
| grape-m1120  | 12               | 19459384           | 19459478         | -                   |                        |                 | AGAAGAACAAGTAGACTGAGC  | 21              |                           | 1067                      |
| grape-m1191  | 13               | 4841635            | 4841840          | +                   | CTGAATGGATCAAGGAGTTGT  | 21              |                        |                 | 75                        |                           |
| grape-m1203  | 13               | 6511567            | 6511663          | +                   |                        |                 | CACTTCCTTAACTTTTCGGTG  | 21              |                           | 514                       |
| grape-m1354  | 13               | 20548804           | 20548919         | +                   | TTCCTCTTTATTTCTTTCCA   | 21              |                        |                 | 81                        |                           |
| grape-m1364* | 13               | 21037998           | 21038153         | +                   | TTGATTACAGTGGGATGGGACC | 22              |                        |                 | 265                       |                           |
| grape-m1458  | 13               | 4835472            | 4835625          | -                   |                        |                 | CGGGGTTTCGCCGACGGTG    | 20              |                           | 164                       |
| grape-m1556  | 13               | 15466712           | 15466871         | -                   | AAATACTGATTATTCGGTTCAG | 22              |                        |                 | 146                       |                           |
| grape-m1565  | 13               | 16723472           | 16723557         | -                   | ACGGTCAATGATTTAGCAAGA  | 21              |                        |                 | 141                       |                           |
| grape-m1612  | 13               | 21698084           | 21698183         | -                   | CAAGGCTGAATAGAAAACCAGT | 22              |                        |                 | 92                        |                           |
| grape-m1662  | 13               | 24202107           | 24202197         | -                   | TCGAGAAAGGGCAAGAATGGC  | 21              |                        |                 | 202                       |                           |
| grape-m1944  | 14               | 28011371           | 28011525         | +                   |                        |                 | GTAAGGACTTTCAAAGACGGGA | 22              |                           | 81                        |
| grape-m2136  | 14               | 14721543           | 14721732         | -                   | TACCAAGGTCGAGGATTGACT  | 21              |                        |                 | 1915                      |                           |
| grape-m2196  | 14               | 21179859           | 21179967         | -                   | GAAGATCCGGAATTCTTAGAGC | 22              |                        |                 | 43                        |                           |
| grape-m2399  | 15               | 8297135            | 8297221          | +                   | GGTGGTTATGGAGTGGGCTTG  | 21              |                        |                 | 17531                     |                           |
| grape-m2483  | 15               | 16588282           | 16588444         | +                   |                        |                 | TGATGAGGATGTAGCTGTTGCA | 22              |                           | 99                        |
| grape-m2616  | 15               | 5849845            | 5849981          | -                   | TTGCTTCGGAAGGTTTACTTC  | 21              |                        |                 | 245                       |                           |
| grape-m2704  | 15               | 11940120           | 11940226         | -                   | TATCATGAACGCTCGAGCGCC  | 21              |                        |                 | 36                        |                           |
| grape-m2830  | 16               | 3217509            | 3217617          | +                   | TTAGGATGGTGAGAAAGAGTG  | 21              |                        |                 | 103                       |                           |
| grape-m2885  | 16               | 11236436           | 11236513         | +                   | AAAGGATCATCGGGCTGTTGCT | 22              |                        |                 | 92                        |                           |
| grape-m3054  | 16               | 7129520            | 7129733          | -                   | CAAAGAAAGAAAGCTGGCAATC | 22              |                        |                 | 34                        |                           |
| grape-m3147  | 16               | 15763862           | 15764097         | -                   | TTTCACTCATCTCCCTAAGG   | 21              |                        |                 | 83                        |                           |
| grape-m3245  | 17               | 5523009            | 5523155          | +                   | AATTGGAGAGTAGGAAAGCTT  | 21              | TCTTTCCTACTCCTCCCATTC  | 22              | 528739                    | 322286                    |
| grape-m3409  | 17               | 2609227            | 2609373          | -                   | AGGGTCTTACTGGGTAGATT   | 20              | TATCCAAGTTTAGATCCTTG   | 22              | 5452                      | 3056                      |
| grape-m3453  | 17               | 6445059            | 6445223          | -                   |                        |                 | TGAATGGAAGGCGAAGAGGA   | 20              |                           | 89                        |

| miRNA name   | chr <sup>a</sup> | start <sup>a</sup> | end <sup>a</sup> | strand <sup>a</sup> | 5p sequence            | nt <sup>b</sup> | 3p sequence            | nt <sup>b</sup> | Abundance 5p <sup>c</sup> | Abundance 3p <sup>c</sup> |
|--------------|------------------|--------------------|------------------|---------------------|------------------------|-----------------|------------------------|-----------------|---------------------------|---------------------------|
| grape-m3469* | 17               | 7265141            | 7265283          | -                   | TGAGATAAGTCTGCTGCT     | 21              | TGAGTAGTGGACTATCGCATG  | 21              | 134                       | 1722                      |
| grape-m3618  | 18               | 4447466            | 4447594          | +                   |                        |                 | ACCAATGGTGTCTCAGGACA   | 21              |                           | 184                       |
| grape-m3772  | 18               | 24220613           | 24220765         | +                   |                        |                 | ATGGACTATGTCAAGGGACT   | 20              |                           | 82                        |
| grape-m3778  | 18               | 24586743           | 24586858         | +                   |                        |                 | CTTGAGAGCTCCAATGGATGG  | 21              |                           | 1040                      |
| grape-m3816  | 18               | 27782605           | 27782800         | +                   |                        |                 | TTGATGGTAGAGATTCTAAAG  | 21              |                           | 740                       |
| grape-m3841  | 18               | 714470             | 714623           | -                   |                        |                 | TGGCGCTGATTCTTCTGTAG   | 21              |                           | 231                       |
| grape-m3966  | 18               | 12957736           | 12957884         | -                   | ATTAATAGATTGTCAAGTGT   | 20              |                        |                 | 82                        |                           |
| grape-m4051  | 18               | 23054619           | 23054804         | -                   |                        |                 | TAAGATATCTCTATTGGCATG  | 21              |                           | 172                       |
| grape-m4178  | 19               | 4078806            | 4078999          | +                   |                        |                 | CGTGAAGATCATCAAGTTGGA  | 21              |                           | 1822                      |
| grape-m4179  | 19               | 4080388            | 4080575          | +                   |                        |                 | CGTGAAGATCATCAAGTTGGA  | 21              |                           | 1822                      |
| grape-m4180  | 19               | 4104952            | 4105148          | +                   |                        |                 | CGTGAAGATCATCAAGTTGGA  | 21              |                           | 1822                      |
| grape-m4207  | 19               | 7695221            | 7695343          | +                   |                        |                 | TTCACTTCAAGCTTGGACTAG  | 21              |                           | 57                        |
| grape-m4241  | 19               | 11013461           | 11013568         | +                   |                        |                 | TCGGAAAATGCACAAAATTT   | 20              |                           | 621                       |
| grape-m4250  | 19               | 11833169           | 11833287         | +                   | AGGGTGTGAGAAATGTGAAGA  | 21              |                        |                 | 119                       |                           |
| grape-m4269  | 19               | 13951057           | 13951244         | +                   |                        |                 | TGTCTGAGAATTGCTTCAAGG  | 21              |                           | 1029                      |
| grape-m4277  | 19               | 15131212           | 15131329         | +                   | AGGGTGTGAGAAATGTGAAGA  | 21              |                        |                 | 119                       |                           |
| grape-m4281  | 19               | 15466582           | 15466713         | +                   | CATGTCACCTCGTCAAGCCAAG | 21              |                        |                 | 2907                      |                           |
| grape-m4363  | 19               | 23202090           | 23202163         | +                   |                        |                 | AGCGGACCGTCCGGCGAAG    | 20              |                           | 58                        |
| grape-m4455  | 19               | 7308948            | 7309138          | -                   |                        |                 | GTTGAGCACAAAGGGGACAAG  | 21              |                           | 88                        |
| grape-m4520  | 19               | 14726502           | 14726626         | -                   | CGTGAAGATCATCAAGTTGGA  | 21              |                        |                 | 1822                      |                           |
| grape-m4553* | 19               | 18872706           | 18872824         | -                   | TCCCTCAAAGGCTTCCAATTT  | 21              | GTTGGAAGTCGGTGGGGGACC  | 21              | 409                       | 20202                     |
| grape-m4560  | 19               | 19300048           | 19300174         | -                   | TTTGGCAGTGATTCTAGGAAA  | 21              |                        |                 | 120                       |                           |
| grape-m4757  | 1                | 14504569           | 14504688         | +                   | TTGAGATCGTCTTGAGGGGA   | 21              |                        |                 | 75                        |                           |
| grape-m4795  | 1                | 17956448           | 17956517         | +                   | AACATGAATGAGCACTCTCCT  | 21              |                        |                 | 43                        |                           |
| grape-m4809  | 1                | 19488979           | 19489200         | +                   | TTTCACTCATCTCCCTAAGG   | 21              |                        |                 | 83                        |                           |
| grape-m4846  | 1                | 361208             | 361343           | -                   | CCATCGGTTTGAAATTCATC   | 21              |                        |                 | 68                        |                           |
| grape-m4908  | 1                | 7871756            | 7871876          | -                   |                        |                 | AGGCAAAGGTAGGATTGGGTCA | 22              |                           | 37                        |
| grape-m4912  | 1                | 8218404            | 8218578          | -                   |                        |                 | GATGAAGTGGGTGCTGTCTC   | 20              |                           | 82                        |
| grape-m5176  | Un               | 16227504           | 16227644         | +                   | TTGAGAGCTAAAGGAAGGCCT  | 21              |                        |                 | 88                        |                           |
| grape-m5236  | Un               | 23153364           | 23153458         | +                   |                        |                 | ATTGATTGGTTGGGATAGGTT  | 21              |                           | 96                        |
| grape-m5380  | Un               | 38428043           | 38428125         | +                   |                        |                 | GGAGATTATGTTGTGGATGG   | 20              |                           | 84                        |
| grape-m5408  | Un               | 40428338           | 40428432         | +                   |                        |                 | ATTGATTGGTTGGGATAGGTT  | 21              |                           | 96                        |

| miRNA name   | chr <sup>a</sup> | start <sup>a</sup> | end <sup>a</sup> | strand <sup>a</sup> | 5p sequence            | nt <sup>b</sup> | 3p sequence            | nt <sup>b</sup> | Abundance 5p <sup>c</sup> | Abundance 3p <sup>c</sup> |
|--------------|------------------|--------------------|------------------|---------------------|------------------------|-----------------|------------------------|-----------------|---------------------------|---------------------------|
| grape-m5638  | Un               | 21377636           | 21377769         | -                   | ATTGATTGGTTGGGATAGGTT  | 21              |                        |                 | 96                        |                           |
| grape-m5747  | Un               | 33339005           | 33339208         | -                   |                        |                 | CGTGAAGATCATCAAGTTGGA  | 21              |                           | 1822                      |
| grape-m5836  | Un               | 40321003           | 40321097         | -                   |                        |                 | ATTGATTGGTTGGGATAGGTT  | 21              |                           | 96                        |
| grape-m6251  | 2                | 13048510           | 13048691         | -                   |                        |                 | ATTTTAGGTTTTTTGGTTTTA  | 21              |                           | 65                        |
| grape-m6520  | 18<br>random     | 3407778            | 3407992          | -                   |                        |                 | TTGGCTAAGTTCATTGTTGCAG | 22              |                           | 148                       |
| grape-m6580  | 3                | 4131893            | 4131994          | +                   |                        |                 | TGTTCATAAAGATGTGATGTG  | 20              |                           | 36                        |
| grape-m6581  | 3                | 4154887            | 4155010          | +                   | TATGAACTCCTGTATGTGCA   | 20              |                        |                 | 39                        |                           |
| grape-m6603  | 3                | 6148832            | 6148899          | +                   | CCAAACGAAGCGTACTGAGG   | 20              |                        |                 | 37                        |                           |
| grape-m6710  | 3                | 15367124           | 15367400         | +                   | ATAGATCAGATAGTCGACGCC  | 21              |                        |                 | 168                       |                           |
| grape-m6790  | 3                | 1771706            | 1771804          | -                   |                        |                 | GTTAGTCTGGAATGGAGGGGC  | 21              |                           | 92                        |
| grape-m6845  | 3                | 7752610            | 7752756          | -                   |                        |                 | TAAGTTGATTCGATTGTGGAT  | 22              |                           | 84                        |
| grape-m6873  | 3                | 10530619           | 10530800         | -                   | CGGGATTTTGGTAACTTAACC  | 21              |                        |                 | 1538                      |                           |
| grape-m6905  | 3                | 13241508           | 13241588         | -                   | GCCGCGTTGGAGCAGGAGCTT  | 21              |                        |                 | 1513                      |                           |
| grape-m6953  | 3                | 17920034           | 17920105         | -                   |                        |                 | GCTAGTACGTGTTGCAGGGGA  | 21              |                           | 90                        |
| grape-m7008  | 4                | 3099245            | 3099408          | +                   |                        |                 | TGTCCTTGACCTCGTTTTAAAG | 22              |                           | 645                       |
| grape-m7192  | 4                | 23525665           | 23525775         | +                   |                        |                 | GGAAGAAGAGATGCATGCTC   | 20              |                           | 43                        |
| grape-m7209* | 4                | 1141381            | 1141521          | -                   | ACAGTAGGAAATTGAAAGAGA  | 21              |                        |                 | 628                       |                           |
| grape-m7218  | 4                | 2265913            | 2266028          | -                   | TGTAGGGAGTAGAATGCAGC   | 20              | TACATTGGGCTCTCTTCTTC   | 20              | 16062                     | 606                       |
| grape-m7388  | 4                | 20931852           | 20931953         | -                   |                        |                 | GACTATTGCCGGTGTGGAAGG  | 22              |                           | 37                        |
| grape-m7484  | 5                | 2941942            | 2942051          | +                   |                        |                 | TTGGCTGTAAAGTGTCACT    | 20              |                           | 33                        |
| grape-m7540  | 5                | 10459977           | 10460094         | +                   | GGAAGATGTGTACGGATGGTGT | 22              |                        |                 | 84                        |                           |
| grape-m7644* | 5                | 20944390           | 20944559         | +                   | AATATGGAGGACTGTGTTCTT  | 21              |                        |                 | 5765                      |                           |
| grape-m7670  | 5                | 22089877           | 22089947         | +                   |                        |                 | TCTGAAGCTTACCTAGAGACC  | 22              |                           | 71                        |
| grape-m7692  | 5                | 24544386           | 24544456         | +                   | AGCGAGTCGCTGGTCAAGCG   | 20              |                        |                 | 60                        |                           |
| grape-m7774  | 5                | 7401989            | 7402105          | -                   |                        |                 | GGAGATTATGTTGTGGATGG   | 20              |                           | 84                        |
| grape-m7843  | 5                | 15969599           | 15969708         | -                   | ATGGGATGGAACATTATTCGT  | 21              |                        |                 | 564                       |                           |
| grape-m7969* | 6                | 4485456            | 4485555          | +                   |                        |                 | TCAAAAGAGAAAATGTGGATG  | 21              |                           | 2770                      |
| grape-m8013  | 6                | 9147662            | 9147757          | +                   | TTGACTTTGGTGTGTTTGGACC | 21              |                        |                 | 539                       |                           |
| grape-m8119  | 6                | 782864             | 782963           | -                   | GGAGGATTGATCAGTGGGGC   | 20              |                        |                 | 153                       |                           |
| grape-m8278  | 6                | 19950730           | 19950847         | -                   | TCCCTCAAAGGCTTCCAATTT  | 20              | GCTGGAAGCCGATGGGGGACC  | 21              | 409                       | 12122                     |
| grape-m8392  | 7                | 12636275           | 12636426         | +                   |                        |                 | ATGGACTATGTCAAGGGACT   | 20              |                           | 82                        |
| grape-m8399  | 7                | 13415540           | 13415652         | +                   |                        |                 | AGATGTGGGGAATTGGAGCAAG | 22              |                           | 81                        |

| miRNA name   | chr <sup>a</sup> | start <sup>a</sup> | end <sup>a</sup> | strand <sup>a</sup> | 5p sequence            | nt <sup>b</sup> | 3p sequence           | nt <sup>b</sup> | Abundance 5p <sup>c</sup> | Abundance 3p <sup>c</sup> |
|--------------|------------------|--------------------|------------------|---------------------|------------------------|-----------------|-----------------------|-----------------|---------------------------|---------------------------|
| grape-m8476  | 7                | 2176796            | 2176906          | -                   |                        |                 | CATGATTAAAGAGCTCATGT  | 20              |                           | 88                        |
| grape-m8937* | 8                | 14593863           | 14594095         | -                   | CCGAGGGAGAGAGCGAGAGGA  | 21              | CTCTCACTCTGTCCCTCAGTC | 21              | 1986                      | 358                       |
| grape-m8943  | 8                | 15175935           | 15176139         | -                   | TCAATGTAACCTTGGGAGCTG  | 21              |                       |                 | 90                        |                           |
| grape-m8960  | 8                | 17310763           | 17310986         | -                   |                        |                 | TAAACGGAGATTGTTTGACT  | 20              |                           | 84                        |
| grape-m8993  | 8                | 21905716           | 21905814         | -                   | TCGTAGTGGCTGCGACAGCTCC | 22              |                       |                 | 3823                      |                           |
| grape-m9163  | 9                | 16109677           | 16109880         | +                   | TGAGATTGAAGACTTTGATGT  | 21              |                       |                 | 12142                     |                           |
| grape-m9201  | 9                | 20314929           | 20315048         | +                   | TTGGAGATCGTCTTGAGGGGA  | 21              |                       |                 | 75                        |                           |
| grape-m9269  | 9                | 3184788            | 3184924          | -                   |                        |                 | TTCTTCTCACCGTTTCTCAGC | 21              |                           | 1344                      |
| grape-m9381  | 9                | 14373742           | 14373950         | -                   | CGTTTCCCACAGACGGCGCCA  | 21              |                       |                 | 9845                      |                           |
| grape-m9401  | 9                | 16648813           | 16648934         | -                   | TTGGAGATCGTCTTGAGGGGA  | 21              |                       |                 | 75                        |                           |
| grape-m9410  | 9                | 18443427           | 18443584         | -                   | TCAGCCAATAGTTCATCGAGGC | 22              | CTCATGAATTGTTGGCTGATA | 21              | 4613                      | 382                       |

<sup>a</sup> Refers to the genomic localization on the GRAPE\_IGGP12Xv1 genome sequence.

<sup>b</sup> nucleotide, sequence length of the microRNA.

<sup>c</sup> Sum of TP5M values from 68 libraries.

\*These miRNAs were also identified by Wang et al., 2011; Han et al., 2014, and Wang et al., 2014.
