# Supplementary material for: miRVine: a microRNA expression atlas of grapevine based on small RNA sequencing
Source: PubMed Central journal article supplement (PMC4434875; doi:10.1186/s12864-015-1610-5), 2015-05-16
Supplement: 12864_2015_1610_MOESM5_ESM.pdf [file 12864_2015_1610_MOESM5_ESM.pdf]

| miRNA          | chr <sup>a</sup> | star <sup>a</sup> | end <sup>a</sup> | strand <sup>a</sup> | 5p sequence            | nt <sup>b</sup> | 3p sequence            | nt <sup>b</sup> | Abundance 5p <sup>c</sup> | Abundance 3p <sup>c</sup> |
|----------------|------------------|-------------------|------------------|---------------------|------------------------|-----------------|------------------------|-----------------|---------------------------|---------------------------|
| vvi-miRC2118   | 19               | 9739626           | 9739720          | +                   | GGTATGGGTGGGCCGGGAAAA  | 21              | TTGCCGACTCCACCCATACCTA | 22              | 23                        | 12643                     |
| vvi-miRC3629f  | 19               | 5056194           | 5056436          | +                   | TTGGTTACCGAGAAAACGCAG  | 21              |                        |                 | 498                       |                           |
| vvi-miRC3635a  | 18               | 27417341          | 27417475         | +                   |                        |                 | ATTATGTCCCACACATGCCTC  | 21              |                           | 79                        |
| vvi-miRC391*   | 6                | 3976406           | 3976497          | -                   | TTCGCAGGAGAGATGACGCCGT | 22              |                        |                 | 58                        |                           |
| vvi-miRC399j   | 10               | 2978899           | 2979015          | -                   |                        |                 | TGCCAAAGGAGATTTGCCCCG  | 21              |                           | 45                        |
| vvi-miRC482a*  | 14               | 19755468          | 19755588         | -                   | GGAATGGGCTGATTGGGATA   | 20              | TTTTCCAATGCCGCCATTCC   | 22              | 7663                      | 2722                      |
| vvi-miRC5225a* | 14               | 28620631          | 28620733         | +                   | TCTGTTCGAGGAGAGATGATGC | 22              |                        |                 | 755                       |                           |
| vvi-miRC529*   | 5                | 19124470          | 19124728         | -                   |                        |                 | AGAAGAGAGAGAGTACAGCTA  | 21              |                           | 1111                      |
| vvi-miRC535d   | Un               | 10256638          | 10256736         | -                   | TGACAACGAGAGAGAGCATGC  | 21              |                        |                 | 58                        |                           |
| vvi-miRC535e   | Un               | 10277197          | 10277295         | -                   | TGACAACGAGAGAGAGCATGC  | 21              |                        |                 | 58                        |                           |
| vvi-miRC535h   | Un               | 11738797          | 11739027         | +                   |                        |                 | TGACAACGAGAGAGAGCATGC  | 21              |                           | 58                        |
| vvi-miRC535i   | Un               | 11799052          | 11799267         | +                   |                        |                 | TGACAACGAGAGAGAGCATGC  | 21              |                           | 58                        |
| vvi-miRC535j*  | Un               | 11820795          | 11820908         | +                   | TGACAAAGAGAGAGAGCACAC  | 21              |                        |                 | 1116                      |                           |
| vvi-miRC535k   | Un               | 37604874          | 37604972         | -                   | TGACAACGAGAGAGAGCATGC  | 21              |                        |                 | 58                        |                           |
| vvi-miRC771    | 14               | 17188645          | 17188772         | -                   |                        |                 | TGAGTCTAATCGTCGTATGGC  | 21              |                           | 124                       |
| grape-m0193    | 13               | 20234980          | 20235070         | +                   |                        |                 | GTATCGGCAAACTACTCTGG   | 21              |                           | 176                       |
| grape-m0221    | 13               | 9274642           | 9274828          | -                   | TGGTTATAGAGAAGCTGAGCG  | 21              |                        |                 | 1436                      |                           |
| grape-m0250    | 13               | 21869432          | 21869586         | -                   |                        |                 | TGTAGAGACTCTAGTGATGGG  | 21              |                           | 264                       |
| grape-m0281*   | 14               | 10959011          | 10959186         | +                   | CTAGAGATTGTGGATTAGGCT  | 21              |                        |                 | 1614                      |                           |
| grape-m0283    | 14               | 12116273          | 12116391         | +                   |                        |                 | TGGAGGAGAATCTTGAAGTGC  | 21              |                           | 178                       |
| grape-m0297    | 14               | 22335451          | 22335595         | +                   | TTCTCAGCTACTAATATCAAG  | 21              |                        |                 | 60                        |                           |
| grape-m0534    | 17               | 5681196           | 5681433          | -                   | GTGGAGTTTTGTGAAGCTTAT  | 21              | TGGTTTCAGATCACTCCTCCC  | 21              | 19                        | 49                        |
| grape-m0555    | 18               | 5500395           | 5500665          | +                   | TGGTTATAGAGAAGCTGAGCG  | 21              |                        |                 | 1436                      |                           |
| grape-m0563    | 18               | 13887168          | 13887304         | +                   |                        |                 | TGAGCTCTAACATTGGTGAAG  | 21              |                           | 31                        |
| grape-m0640    | 19               | 3974695           | 3974841          | +                   |                        |                 | CTTGATCTTTCTTTGACAGTG  | 21              |                           | 112                       |
| grape-m0641    | 19               | 4034775           | 4034921          | +                   |                        |                 | CTTGATCTTTCTTTGACAGTG  | 21              |                           | 112                       |
| grape-m0642    | 19               | 4078944           | 4079090          | +                   |                        |                 | CTTGATCTTTCTTTGACAGTG  | 21              |                           | 112                       |
| grape-m0657*   | 19               | 12889975          | 12890065         | +                   |                        |                 | GTTGGAAGCCGGTGGGGGACC  | 21              |                           | 273                       |
| grape-m0721*   | 1                | 3865560           | 3865686          | +                   | CATGGGCGGTTTGGTAAGAGG  | 21              | TCTTACCAACACCTCCCATTC  | 22              | 10905                     | 7499                      |
| grape-m0738    | 1                | 7530676           | 7530798          | +                   |                        |                 | TGGGGTACGAACTAGAGGTGG  | 21              |                           | 102                       |
| grape-m0941    | 2                | 14372620          | 14372799         | -                   | TGCAGACCGTTTTGGAGGAGG  | 21              |                        |                 | 91                        |                           |
| grape-m0954    | 13 random        | 2504393           | 2504483          | +                   |                        |                 | GTATCGGCAAACTACTCTGG   | 21              |                           | 176                       |

| miRNA        | chr <sup>a</sup> | star <sup>a</sup> | end <sup>a</sup> | strand <sup>a</sup> | 5p sequence           | nt <sup>b</sup> | 3p sequence            | nt <sup>b</sup> | Abundance 5p <sup>c</sup> | Abundance 3p <sup>c</sup> |
|--------------|------------------|-------------------|------------------|---------------------|-----------------------|-----------------|------------------------|-----------------|---------------------------|---------------------------|
| grape-m1073* | 4                | 378829            | 378904           | -                   |                       |                 | GGAGTGAAATTGCAGTGACGG  | 21              |                           | 73                        |
| grape-m1185  | 6                | 5662499           | 5662579          | +                   |                       |                 | GTGGCTTCACATCATGGCTTTA | 22              |                           | 56                        |
| grape-m1209  | 6                | 13593086          | 13593171         | -                   | TTGAGATTTCTGAATGCAGGC | 21              |                        |                 | 1297                      |                           |
| grape-m1235  | 7                | 13327670          | 13327812         | +                   |                       |                 | TAAGGTCCCGAGTTCGAATCC  | 21              |                           | 148                       |
| grape-m1351  | 9                | 4633115           | 4633209          | +                   | AAAGATTGTTGCTGAAGAGTG | 21              |                        |                 | 221                       |                           |
| grape-m1398  | 9                | 12277787          | 12277891         | -                   |                       |                 | TAAGATTGTTGTTGAAGAATG  | 21              |                           | 559                       |

<sup>a</sup> Refers to the genomic localization on the GRAPE\_IGGP12Xv1 genome sequence.

<sup>b</sup> nucleotide, sequence length of the microRNA.

<sup>c</sup> Sum of TP5M values from 2 libraries.

\*These miRNAs were also identified by Wang et al., 2011; Han et al., 2014, and Wang et al., 2014.
