# Supplementary material for: miRVine: a microRNA expression atlas of grapevine based on small RNA sequencing
Source: PubMed Central journal article supplement (PMC4434875; doi:10.1186/s12864-015-1610-5), 2015-05-16
Supplement: 12864_2015_1610_MOESM8_ESM.pdf [file 12864_2015_1610_MOESM8_ESM.pdf]

| miRNA          | Target id            | Alignment                                                                                         | Score | Range     | Target gene functional annotation             |
|----------------|----------------------|---------------------------------------------------------------------------------------------------|-------|-----------|-----------------------------------------------|
| vvi-miR156b-5p | VIT_215s0046g01020.1 | target 5' GTGATCAACTTTCTTCTGTCA 3'<br>::: :: :::::::::::::::<br>miRNA 3' CACGAG-TGAGAGAAGACAGT 5' | 3     | 1781-1801 | Uncharacterized protein loc100241322          |
| vvi-miR156b-5p | VIT_215s0046g01020.2 | target 5' GTGATCAACTTTCTTCTGTCA 3'<br>::: :: :::::::::::::::<br>miRNA 3' CACGAG-TGAGAGAAGACAGT 5' | 3     | 1781-1801 | Uncharacterized protein loc100241322          |
| vvi-miR156b-5p | VIT_215s0046g01020.3 | target 5' GTGATCAACTTTCTTCTGTCA 3'<br>::: :: :::::::::::::::<br>miRNA 3' CACGAG-TGAGAGAAGACAGT 5' | 3     | 1781-1801 | Uncharacterized protein loc100241322          |
| vvi-miR156b-5p | VIT_215s0046g01020.4 | target 5' GTGATCAACTTTCTTCTGTCA 3'<br>::: :: :::::::::::::::<br>miRNA 3' CACGAG-TGAGAGAAGACAGT 5' | 3     | 1781-1801 | Uncharacterized protein loc100241322          |
| vvi-miR156b-5p | VIT_215s0046g01020.5 | target 5' GTGATCAACTTTCTTCTGTCA 3'<br>::: :: :::::::::::::::<br>miRNA 3' CACGAG-TGAGAGAAGACAGT 5' | 3     | 836-856   | Uncharacterized protein loc100241322          |
| vvi-miR156b-5p | VIT_217s0000g01260.1 | target 5' GTGCTCTCTCTTCTGTCA 3'<br>::::: :::::::::::::::<br>miRNA 3' CACGAGTGAGAGAAGACAGT 5'      | 1     | 953-972   | Squamosa promoter-binding-like protein 13     |
| vvi-miR156b-5p | VIT_217s0000g05020.1 | target 5' GTGCTCTCTCTTCTGTCA 3'<br>::::: :::::::::::::::<br>miRNA 3' CACGAGTGAGAGAAGACAGT 5'      | 1     | 1232-1251 | Squamosa promoter-binding-like protein 6-like |
| vvi-miR156b-5p | VIT_217s0000g05020.2 | target 5' GTGCTCTCTCTTCTGTCA 3'<br>::::: :::::::::::::::<br>miRNA 3' CACGAGTGAGAGAAGACAGT 5'      | 1     | 1232-1251 | Squamosa promoter-binding-like protein 6-like |
| vvi-miR156b-5p | VIT_217s0000g05020.3 | target 5' GTGCTCTCTCTTCTGTCA 3'<br>::::: :::::::::::::::<br>miRNA 3' CACGAGTGAGAGAAGACAGT 5'      | 1     | 1232-1251 | Squamosa promoter-binding-like protein 6-like |
| vvi-miR156b-5p | VIT_219s0090g01180.4 | target 5' ATGCTCACTCTTTCTGTCA 3'<br>::::: :::::::::::::::<br>miRNA 3' CACGAGTGAGAGAAGACAGT 5'     | 2     | 161-180   | Uncharacterized protein                       |
| vvi-miR156b-5p | VIT_219s0090g01180.7 | target 5' ATGCTCACTCTTTCTGTCA 3'<br>::::: :::::::::::::::<br>miRNA 3' CACGAGTGAGAGAAGACAGT 5'     | 2     | 161-180   | Uncharacterized protein                       |
| vvi-miR156c-5p | VIT_201s0010g03710.1 | target 5' GTGCTCTCTCTTCTGTCA 3'<br>::::: :::::::::::::::<br>miRNA 3' CACGAGTGAGAGAAGACAGT 5'      | 1     | 1145-1164 | Squamosa promoter-binding-like protein 2      |
| vvi-miR156c-5p | VIT_201s0010g03710.2 | target 5' GTGCTCTCTCTTCTGTCA 3'<br>::::: :::::::::::::::<br>miRNA 3' CACGAGTGAGAGAAGACAGT 5'      | 1     | 1208-1227 | Squamosa promoter-binding-like protein 2      |
| vvi-miR156c-5p | VIT_201s0010g03710.3 | target 5' GTGCTCTCTCTTCTGTCA 3'<br>::::: :::::::::::::::<br>miRNA 3' CACGAGTGAGAGAAGACAGT 5'      | 1     | 1145-1164 | Squamosa promoter-binding-like protein 2      |

| miRNA          | Target id            | Alignment |                            | Score | Range     | Target gene functional annotation              |
|----------------|----------------------|-----------|----------------------------|-------|-----------|------------------------------------------------|
| vvi-miR156c-5p | VIT_201s0010g03710.4 | target    | 5' GTGCTCTCTCTCTCTGTCA 3'  | 1     | 1145-1164 | Squamosa promoter-binding-like protein 2       |
|                |                      | miRNA     | 3' CACGAGTGAGAGAAGACAGT 5' |       |           |                                                |
| vvi-miR156c-5p | VIT_201s0010g03710.5 | target    | 5' GTGCTCTCTCTCTCTGTCA 3'  | 1     | 1208-1227 | Squamosa promoter-binding-like protein 2       |
|                |                      | miRNA     | 3' CACGAGTGAGAGAAGACAGT 5' |       |           |                                                |
| vvi-miR156c-5p | VIT_201s0010g03710.6 | target    | 5' GTGCTCTCTCTCTCTGTCA 3'  | 1     | 1145-1164 | Squamosa promoter-binding-like protein 2       |
|                |                      | miRNA     | 3' CACGAGTGAGAGAAGACAGT 5' |       |           |                                                |
| vvi-miR156c-5p | VIT_201s0010g03910.1 | target    | 5' GTGCTCTCTCTCTCTGTCA 3'  | 1     | 881-900   | Squamosa promoter-binding-like protein 13-like |
|                |                      | miRNA     | 3' CACGAGTGAGAGAAGACAGT 5' |       |           |                                                |
| vvi-miR156c-5p | VIT_201s0010g03910.2 | target    | 5' GTGCTCTCTCTCTCTGTCA 3'  | 1     | 881-900   | Squamosa promoter-binding-like protein 13-like |
|                |                      | miRNA     | 3' CACGAGTGAGAGAAGACAGT 5' |       |           |                                                |
| vvi-miR156c-5p | VIT_201s0010g03910.3 | target    | 5' GTGCTCTCTCTCTCTGTCA 3'  | 1     | 881-900   | Squamosa promoter-binding-like protein 13-like |
|                |                      | miRNA     | 3' CACGAGTGAGAGAAGACAGT 5' |       |           |                                                |
| vvi-miR156c-5p | VIT_201s0011g00130.1 | target    | 5' GTGCTCTCTCTCTCTGTCA 3'  | 1     | 1250-1269 | Squamosa promoter-binding-like protein 6-like  |
|                |                      | miRNA     | 3' CACGAGTGAGAGAAGACAGT 5' |       |           |                                                |
| vvi-miR156c-5p | VIT_201s0011g00130.2 | target    | 5' GTGCTCTCTCTCTCTGTCA 3'  | 1     | 1250-1269 | Squamosa promoter-binding-like protein 6-like  |
|                |                      | miRNA     | 3' CACGAGTGAGAGAAGACAGT 5' |       |           |                                                |
| vvi-miR156c-5p | VIT_208s0007g06270.1 | target    | 5' GTGCTCTCTCTCTCTGTCA 3'  | 1     | 788-807   | Squamosa promoter-binding-like protein 9-like  |
|                |                      | miRNA     | 3' CACGAGTGAGAGAAGACAGT 5' |       |           |                                                |
| vvi-miR156c-5p | VIT_211s0065g00170.1 | target    | 5' GTGCTCTCTCTCTCTGTCA 3'  | 1     | 1124-1143 | Squamosa promoter-binding-like protein 12-like |
|                |                      | miRNA     | 3' CACGAGTGAGAGAAGACAGT 5' |       |           |                                                |
| vvi-miR156c-5p | VIT_211s0065g00170.2 | target    | 5' GTGCTCTCTCTCTCTGTCA 3'  | 1     | 1124-1143 | Squamosa promoter-binding-like protein 12-like |
|                |                      | miRNA     | 3' CACGAGTGAGAGAAGACAGT 5' |       |           |                                                |
| vvi-miR156c-5p | VIT_211s0065g00170.3 | target    | 5' GTGCTCTCTCTCTCTGTCA 3'  | 1     | 1124-1143 | Squamosa promoter-binding-like protein 12-like |
|                |                      | miRNA     | 3' CACGAGTGAGAGAAGACAGT 5' |       |           |                                                |
| vvi-miR156c-5p | VIT_211s0065g00170.4 | target    | 5' GTGCTCTCTCTCTCTGTCA 3'  | 1     | 1124-1143 | Squamosa promoter-binding-like protein 12-like |
|                |                      | miRNA     | 3' CACGAGTGAGAGAAGACAGT 5' |       |           |                                                |
| vvi-miR156c-5p | VIT_211s0065g00170.5 | target    | 5' GTGCTCTCTCTCTCTGTCA 3'  | 1     | 1124-1143 | Squamosa promoter-binding-like protein 12-like |
|                |                      | miRNA     | 3' CACGAGTGAGAGAAGACAGT 5' |       |           |                                                |





| miRNA          | Target id            | Alignment                                                                   | Score | Range     | Target gene functional annotation              |
|----------------|----------------------|-----------------------------------------------------------------------------|-------|-----------|------------------------------------------------|
| vvi-miR156d-5p | VIT_201s0010g03710.1 | target 5' GTGCTCTCTCTCTCTGTCA 3'<br>:::<br>miRNA 3' CACGAGTGAGAGAAGACAGT 5' | 1     | 1145-1164 | Squamosa promoter-binding-like protein 2       |
| vvi-miR156d-5p | VIT_201s0010g03710.2 | target 5' GTGCTCTCTCTCTCTGTCA 3'<br>:::<br>miRNA 3' CACGAGTGAGAGAAGACAGT 5' | 1     | 1208-1227 | Squamosa promoter-binding-like protein 2       |
| vvi-miR156d-5p | VIT_201s0010g03710.3 | target 5' GTGCTCTCTCTCTCTGTCA 3'<br>:::<br>miRNA 3' CACGAGTGAGAGAAGACAGT 5' | 1     | 1145-1164 | Squamosa promoter-binding-like protein 2       |
| vvi-miR156d-5p | VIT_201s0010g03710.4 | target 5' GTGCTCTCTCTCTCTGTCA 3'<br>:::<br>miRNA 3' CACGAGTGAGAGAAGACAGT 5' | 1     | 1145-1164 | Squamosa promoter-binding-like protein 2       |
| vvi-miR156d-5p | VIT_201s0010g03710.5 | target 5' GTGCTCTCTCTCTCTGTCA 3'<br>:::<br>miRNA 3' CACGAGTGAGAGAAGACAGT 5' | 1     | 1208-1227 | Squamosa promoter-binding-like protein 2       |
| vvi-miR156d-5p | VIT_201s0010g03710.6 | target 5' GTGCTCTCTCTCTCTGTCA 3'<br>:::<br>miRNA 3' CACGAGTGAGAGAAGACAGT 5' | 1     | 1145-1164 | Squamosa promoter-binding-like protein 2       |
| vvi-miR156d-5p | VIT_201s0010g03910.1 | target 5' GTGCTCTCTCTCTCTGTCA 3'<br>:::<br>miRNA 3' CACGAGTGAGAGAAGACAGT 5' | 1     | 881-900   | Squamosa promoter-binding-like protein 13-like |
| vvi-miR156d-5p | VIT_201s0010g03910.2 | target 5' GTGCTCTCTCTCTCTGTCA 3'<br>:::<br>miRNA 3' CACGAGTGAGAGAAGACAGT 5' | 1     | 881-900   | Squamosa promoter-binding-like protein 13-like |
| vvi-miR156d-5p | VIT_201s0010g03910.3 | target 5' GTGCTCTCTCTCTCTGTCA 3'<br>:::<br>miRNA 3' CACGAGTGAGAGAAGACAGT 5' | 1     | 881-900   | Squamosa promoter-binding-like protein 13-like |
| vvi-miR156d-5p | VIT_201s0011g00130.1 | target 5' GTGCTCTCTCTCTCTGTCA 3'<br>:::<br>miRNA 3' CACGAGTGAGAGAAGACAGT 5' | 1     | 1250-1269 | Squamosa promoter-binding-like protein 6-like  |
| vvi-miR156d-5p | VIT_201s0011g00130.2 | target 5' GTGCTCTCTCTCTCTGTCA 3'<br>:::<br>miRNA 3' CACGAGTGAGAGAAGACAGT 5' | 1     | 1250-1269 | Squamosa promoter-binding-like protein 6-like  |
| vvi-miR156d-5p | VIT_208s0007g06270.1 | target 5' GTGCTCTCTCTCTCTGTCA 3'<br>:::<br>miRNA 3' CACGAGTGAGAGAAGACAGT 5' | 1     | 788-807   | Squamosa promoter-binding-like protein 9-like  |
| vvi-miR156d-5p | VIT_211s0065g00170.1 | target 5' GTGCTCTCTCTCTCTGTCA 3'<br>:::<br>miRNA 3' CACGAGTGAGAGAAGACAGT 5' | 1     | 1124-1143 | Squamosa promoter-binding-like protein 12-like |
| vvi-miR156d-5p | VIT_211s0065g00170.2 | target 5' GTGCTCTCTCTCTCTGTCA 3'<br>:::<br>miRNA 3' CACGAGTGAGAGAAGACAGT 5' | 1     | 1124-1143 | Squamosa promoter-binding-like protein 12-like |

| miRNA          | Target id            | Alignment |                             | Score | Range     | Target gene functional annotation              |
|----------------|----------------------|-----------|-----------------------------|-------|-----------|------------------------------------------------|
| vvi-miR156d-5p | VIT_211s0065g00170.3 | target    | 5' GTGCTCTCTCTCTCTGTCA 3'   | 1     | 1124-1143 | Squamosa promoter-binding-like protein 12-like |
|                |                      | miRNA     | 3' CACGAGTGAGAGAAGACAGT 5'  |       |           |                                                |
| vvi-miR156d-5p | VIT_211s0065g00170.4 | target    | 5' GTGCTCTCTCTCTCTGTCA 3'   | 1     | 1124-1143 | Squamosa promoter-binding-like protein 12-like |
|                |                      | miRNA     | 3' CACGAGTGAGAGAAGACAGT 5'  |       |           |                                                |
| vvi-miR156d-5p | VIT_211s0065g00170.5 | target    | 5' GTGCTCTCTCTCTCTGTCA 3'   | 1     | 1124-1143 | Squamosa promoter-binding-like protein 12-like |
|                |                      | miRNA     | 3' CACGAGTGAGAGAAGACAGT 5'  |       |           |                                                |
| vvi-miR156d-5p | VIT_211s0065g00170.7 | target    | 5' GTGCTCTCTCTCTCTGTCA 3'   | 1     | 1124-1143 | Squamosa promoter-binding-like protein 12-like |
|                |                      | miRNA     | 3' CACGAGTGAGAGAAGACAGT 5'  |       |           |                                                |
| vvi-miR156d-5p | VIT_214s0068g01780.1 | target    | 5' GTGCTTTCTCTCTCTGTCA 3'   | 1.5   | 866-885   | Squamosa promoter-binding-like protein 16-like |
|                |                      | miRNA     | 3' CACGAGTGAGAGAAGACAGT 5'  |       |           |                                                |
| vvi-miR156d-5p | VIT_215s0021g02290.1 | target    | 5' GTGCTCTCTCTCTCTGTCA 3'   | 1     | 797-816   | Squamosa promoter-binding-like protein 7-like  |
|                |                      | miRNA     | 3' CACGAGTGAGAGAAGACAGT 5'  |       |           |                                                |
| vvi-miR156d-5p | VIT_215s0046g01020.1 | target    | 5' GTGATCAACTTTCTTCTGTCA 3' | 3     | 1781-1801 | Uncharacterized protein loc100241322           |
|                |                      | miRNA     | 3' CACGAG-TGAGAGAAGACAGT 5' |       |           |                                                |
| vvi-miR156d-5p | VIT_215s0046g01020.2 | target    | 5' GTGATCAACTTTCTTCTGTCA 3' | 3     | 1781-1801 | Uncharacterized protein loc100241322           |
|                |                      | miRNA     | 3' CACGAG-TGAGAGAAGACAGT 5' |       |           |                                                |
| vvi-miR156d-5p | VIT_215s0046g01020.3 | target    | 5' GTGATCAACTTTCTTCTGTCA 3' | 3     | 1781-1801 | Uncharacterized protein loc100241322           |
|                |                      | miRNA     | 3' CACGAG-TGAGAGAAGACAGT 5' |       |           |                                                |
| vvi-miR156d-5p | VIT_215s0046g01020.4 | target    | 5' GTGATCAACTTTCTTCTGTCA 3' | 3     | 1781-1801 | Uncharacterized protein loc100241322           |
|                |                      | miRNA     | 3' CACGAG-TGAGAGAAGACAGT 5' |       |           |                                                |
| vvi-miR156d-5p | VIT_215s0046g01020.5 | target    | 5' GTGATCAACTTTCTTCTGTCA 3' | 3     | 836-856   | Uncharacterized protein loc100241322           |
|                |                      | miRNA     | 3' CACGAG-TGAGAGAAGACAGT 5' |       |           |                                                |
| vvi-miR156d-5p | VIT_217s0000g01260.1 | target    | 5' GTGCTCTCTCTCTTCTGTCA 3'  | 1     | 953-972   | Squamosa promoter-binding-like protein 13      |
|                |                      | miRNA     | 3' CACGAGTGAGAGAAGACAGT 5'  |       |           |                                                |
| vvi-miR156d-5p | VIT_217s0000g05020.1 | target    | 5' GTGCTCTCTCTCTTCTGTCA 3'  | 1     | 1232-1251 | Squamosa promoter-binding-like protein 6-like  |
|                |                      | miRNA     | 3' CACGAGTGAGAGAAGACAGT 5'  |       |           |                                                |
| vvi-miR156d-5p | VIT_217s0000g05020.2 | target    | 5' GTGCTCTCTCTCTTCTGTCA 3'  | 1     | 1232-1251 | Squamosa promoter-binding-like protein 6-like  |
|                |                      | miRNA     | 3' CACGAGTGAGAGAAGACAGT 5'  |       |           |                                                |

| miRNA          | Target id            | Alignment |                                                    | Score | Range     | Target gene functional annotation              |
|----------------|----------------------|-----------|----------------------------------------------------|-------|-----------|------------------------------------------------|
| vvi-miR156d-5p | VIT_217s0000g05020.3 | target    | 5' GTGCTCTCTCTCTCTGTCA 3'<br>::::: ::::::::::::::  | 1     | 1232-1251 | Squamosa promoter-binding-like protein 6-like  |
|                |                      | miRNA     | 3' CACGAGTGAGAGAAGACAGT 5'                         |       |           |                                                |
| vvi-miR156d-5p | VIT_219s0090g01180.4 | target    | 5' ATGCTCACTCTTTTCTGTCA 3'<br>::::: :::::::::::::: | 2     | 161-180   | Uncharacterized protein                        |
|                |                      | miRNA     | 3' CACGAGTGAGAGAAGACAGT 5'                         |       |           |                                                |
| vvi-miR156d-5p | VIT_219s0090g01180.7 | target    | 5' ATGCTCACTCTTTTCTGTCA 3'<br>::::: :::::::::::::: | 2     | 161-180   | Uncharacterized protein                        |
|                |                      | miRNA     | 3' CACGAGTGAGAGAAGACAGT 5'                         |       |           |                                                |
| vvi-miR156e    | VIT_201s0010g03710.1 | target    | 5' GTGCTCTCTCTCTCTGTCA 3'<br>::::: ::::::::::::::  | 2     | 1145-1164 | Squamosa promoter-binding-like protein 2       |
|                |                      | miRNA     | 3' CACGAGTGAGAGGAGACAGT 5'                         |       |           |                                                |
| vvi-miR156e    | VIT_201s0010g03710.2 | target    | 5' GTGCTCTCTCTCTCTGTCA 3'<br>::::: ::::::::::::::  | 2     | 1208-1227 | Squamosa promoter-binding-like protein 2       |
|                |                      | miRNA     | 3' CACGAGTGAGAGGAGACAGT 5'                         |       |           |                                                |
| vvi-miR156e    | VIT_201s0010g03710.3 | target    | 5' GTGCTCTCTCTCTCTGTCA 3'<br>::::: ::::::::::::::  | 2     | 1145-1164 | Squamosa promoter-binding-like protein 2       |
|                |                      | miRNA     | 3' CACGAGTGAGAGGAGACAGT 5'                         |       |           |                                                |
| vvi-miR156e    | VIT_201s0010g03710.4 | target    | 5' GTGCTCTCTCTCTCTGTCA 3'<br>::::: ::::::::::::::  | 2     | 1145-1164 | Squamosa promoter-binding-like protein 2       |
|                |                      | miRNA     | 3' CACGAGTGAGAGGAGACAGT 5'                         |       |           |                                                |
| vvi-miR156e    | VIT_201s0010g03710.5 | target    | 5' GTGCTCTCTCTCTCTGTCA 3'<br>::::: ::::::::::::::  | 2     | 1208-1227 | Squamosa promoter-binding-like protein 2       |
|                |                      | miRNA     | 3' CACGAGTGAGAGGAGACAGT 5'                         |       |           |                                                |
| vvi-miR156e    | VIT_201s0010g03710.6 | target    | 5' GTGCTCTCTCTCTCTGTCA 3'<br>::::: ::::::::::::::  | 2     | 1145-1164 | Squamosa promoter-binding-like protein 2       |
|                |                      | miRNA     | 3' CACGAGTGAGAGGAGACAGT 5'                         |       |           |                                                |
| vvi-miR156e    | VIT_201s0010g03910.1 | target    | 5' GTGCTCTCTCTCTCTGTCA 3'<br>::::: ::::::::::::::  | 2     | 881-900   | Squamosa promoter-binding-like protein 13-like |
|                |                      | miRNA     | 3' CACGAGTGAGAGGAGACAGT 5'                         |       |           |                                                |
| vvi-miR156e    | VIT_201s0010g03910.2 | target    | 5' GTGCTCTCTCTCTCTGTCA 3'<br>::::: ::::::::::::::  | 2     | 881-900   | Squamosa promoter-binding-like protein 13-like |
|                |                      | miRNA     | 3' CACGAGTGAGAGGAGACAGT 5'                         |       |           |                                                |
| vvi-miR156e    | VIT_201s0010g03910.3 | target    | 5' GTGCTCTCTCTCTCTGTCA 3'<br>::::: ::::::::::::::  | 2     | 881-900   | Squamosa promoter-binding-like protein 13-like |
|                |                      | miRNA     | 3' CACGAGTGAGAGGAGACAGT 5'                         |       |           |                                                |
| vvi-miR156e    | VIT_201s0011g00130.1 | target    | 5' GTGCTCTCTCTCTCTGTCA 3'<br>::::: ::::::::::::::  | 2     | 1250-1269 | Squamosa promoter-binding-like protein 6-like  |
|                |                      | miRNA     | 3' CACGAGTGAGAGGAGACAGT 5'                         |       |           |                                                |
| vvi-miR156e    | VIT_201s0011g00130.2 | target    | 5' GTGCTCTCTCTCTCTGTCA 3'<br>::::: ::::::::::::::  | 2     | 1250-1269 | Squamosa promoter-binding-like protein 6-like  |
|                |                      | miRNA     | 3' CACGAGTGAGAGGAGACAGT 5'                         |       |           |                                                |



| miRNA       | Target id            | Alignment                                                                                                     | Score | Range     | Target gene functional annotation              |
|-------------|----------------------|---------------------------------------------------------------------------------------------------------------|-------|-----------|------------------------------------------------|
| vvi-miR156e | VIT_217s0000g05020.3 | target 5' GTGCTCTCTCTCTCTGTCA 3'<br>:          :          :          :<br>miRNA 3' CACGAGTGAGAGGAGACAGT 5'    | 2     | 1232-1251 | Squamosa promoter-binding-like protein 6-like  |
| vvi-miR156e | VIT_219s0090g01180.4 | target 5' ATGCTCACTCTTTTCTGTCA 3'<br>:          :          :          :<br>miRNA 3' CACGAGTGAGAGGAGACAGT 5'   | 3     | 161-180   | Uncharacterized protein                        |
| vvi-miR156e | VIT_219s0090g01180.7 | target 5' ATGCTCACTCTTTTCTGTCA 3'<br>:          :          :          :<br>miRNA 3' CACGAGTGAGAGGAGACAGT 5'   | 3     | 161-180   | Uncharacterized protein                        |
| vvi-miR156f | VIT_201s0010g03710.1 | target 5' GTGCTCTCTCTCTCTGTCAA 3'<br>:          :          :          :<br>miRNA 3' CACGAGAGATAGAAGACAGTT 5'  | 2     | 1145-1165 | Squamosa promoter-binding-like protein 2       |
| vvi-miR156f | VIT_201s0010g03710.2 | target 5' GTGCTCTCTCTCTCTGTCAA 3'<br>:          :          :          :<br>miRNA 3' CACGAGAGATAGAAGACAGTT 5'  | 2     | 1208-1228 | Squamosa promoter-binding-like protein 2       |
| vvi-miR156f | VIT_201s0010g03710.3 | target 5' GTGCTCTCTCTCTCTGTCAA 3'<br>:          :          :          :<br>miRNA 3' CACGAGAGATAGAAGACAGTT 5'  | 2     | 1145-1165 | Squamosa promoter-binding-like protein 2       |
| vvi-miR156f | VIT_201s0010g03710.4 | target 5' GTGCTCTCTCTCTCTGTCAA 3'<br>:          :          :          :<br>miRNA 3' CACGAGAGATAGAAGACAGTT 5'  | 2     | 1145-1165 | Squamosa promoter-binding-like protein 2       |
| vvi-miR156f | VIT_201s0010g03710.5 | target 5' GTGCTCTCTCTCTCTGTCAA 3'<br>:          :          :          :<br>miRNA 3' CACGAGAGATAGAAGACAGTT 5'  | 2     | 1208-1228 | Squamosa promoter-binding-like protein 2       |
| vvi-miR156f | VIT_201s0010g03710.6 | target 5' GTGCTCTCTCTCTCTGTCAA 3'<br>:          :          :          :<br>miRNA 3' CACGAGAGATAGAAGACAGTT 5'  | 2     | 1145-1165 | Squamosa promoter-binding-like protein 2       |
| vvi-miR156f | VIT_201s0010g03910.1 | target 5' GTGCTCTCTCTCTTCTGTCAT 3'<br>:          :          :          :<br>miRNA 3' CACGAGAGATAGAAGACAGTT 5' | 3     | 881-901   | Squamosa promoter-binding-like protein 13-like |
| vvi-miR156f | VIT_201s0010g03910.2 | target 5' GTGCTCTCTCTCTTCTGTCAT 3'<br>:          :          :          :<br>miRNA 3' CACGAGAGATAGAAGACAGTT 5' | 3     | 881-901   | Squamosa promoter-binding-like protein 13-like |
| vvi-miR156f | VIT_201s0010g03910.3 | target 5' GTGCTCTCTCTCTTCTGTCAT 3'<br>:          :          :          :<br>miRNA 3' CACGAGAGATAGAAGACAGTT 5' | 3     | 881-901   | Squamosa promoter-binding-like protein 13-like |
| vvi-miR156f | VIT_201s0011g00130.1 | target 5' GTGCTCTCTCTCTTCTGTCAG 3'<br>:          :          :          :<br>miRNA 3' CACGAGAGATAGAAGACAGTT 5' | 2.5   | 1250-1270 | Squamosa promoter-binding-like protein 6-like  |
| vvi-miR156f | VIT_201s0011g00130.2 | target 5' GTGCTCTCTCTCTTCTGTCAG 3'<br>:          :          :          :<br>miRNA 3' CACGAGAGATAGAAGACAGTT 5' | 2.5   | 1250-1270 | Squamosa promoter-binding-like protein 6-like  |

| miRNA          | Target id            |        | Alignment                                                                                          | Score | Range     | Target gene functional annotation              |
|----------------|----------------------|--------|----------------------------------------------------------------------------------------------------|-------|-----------|------------------------------------------------|
| vvi-miR156f    | VIT_208s0007g06270.1 | target | 5' GTGCTCTCTCTCTCTGTCAA 3'<br>: : : : : : : : : : : : : : : :<br>miRNA 3' CACGAGAGATAGAAGACAGTT 5' | 2     | 788-808   | Squamosa promoter-binding-like protein 9-like  |
| vvi-miR156f    | VIT_211s0065g00170.1 | target | 5' GTGCTCTCTCTCTCTGTCAA 3'<br>: : : : : : : : : : : : : : : :<br>miRNA 3' CACGAGAGATAGAAGACAGTT 5' | 2     | 1124-1144 | Squamosa promoter-binding-like protein 12-like |
| vvi-miR156f    | VIT_211s0065g00170.2 | target | 5' GTGCTCTCTCTCTCTGTCAA 3'<br>: : : : : : : : : : : : : : : :<br>miRNA 3' CACGAGAGATAGAAGACAGTT 5' | 2     | 1124-1144 | Squamosa promoter-binding-like protein 12-like |
| vvi-miR156f    | VIT_211s0065g00170.3 | target | 5' GTGCTCTCTCTCTCTGTCAA 3'<br>: : : : ~ : : : : : : : : : :<br>miRNA 3' CACGAGAGATAGAAGACAGTT 5'   | 2     | 1124-1144 | Squamosa promoter-binding-like protein 12-like |
| vvi-miR156f    | VIT_211s0065g00170.4 | target | 5' GTGCTCTCTCTCTCTGTCAA 3'<br>: : : : ~ : : : : : : : : : :<br>miRNA 3' CACGAGAGATAGAAGACAGTT 5'   | 2     | 1124-1144 | Squamosa promoter-binding-like protein 12-like |
| vvi-miR156f    | VIT_211s0065g00170.5 | target | 5' GTGCTCTCTCTCTCTGTCAA 3'<br>: : : : ~ : : : : : : : : : :<br>miRNA 3' CACGAGAGATAGAAGACAGTT 5'   | 2     | 1124-1144 | Squamosa promoter-binding-like protein 12-like |
| vvi-miR156f    | VIT_211s0065g00170.7 | target | 5' GTGCTCTCTCTCTCTGTCAA 3'<br>: : : : ~ : : : : : : : : : :<br>miRNA 3' CACGAGAGATAGAAGACAGTT 5'   | 2     | 1124-1144 | Squamosa promoter-binding-like protein 12-like |
| vvi-miR156f    | VIT_215s0021g02290.1 | target | 5' GTGCTCTCTCTCTTGTGCAT 3'<br>: : : : ~ : : : : : : : : : :<br>miRNA 3' CACGAGAGATAGAAGACAGTT 5'   | 3     | 797-817   | Squamosa promoter-binding-like protein 7-like  |
| vvi-miR156f    | VIT_217s0000g01260.1 | target | 5' GTGCTCTCTCTCTTGTGCAT 3'<br>: : : : ~ : : : : : : : : : :<br>miRNA 3' CACGAGAGATAGAAGACAGTT 5'   | 3     | 953-973   | Squamosa promoter-binding-like protein 13      |
| vvi-miR156f    | VIT_217s0000g05020.1 | target | 5' GTGCTCTCTCTCTTGTGCAT 3'<br>: : : : ~ : : : : : : : : : :<br>miRNA 3' CACGAGAGATAGAAGACAGTT 5'   | 3     | 1232-1252 | Squamosa promoter-binding-like protein 6-like  |
| vvi-miR156f    | VIT_217s0000g05020.2 | target | 5' GTGCTCTCTCTCTTGTGCAT 3'<br>: : : : ~ : : : : : : : : : :<br>miRNA 3' CACGAGAGATAGAAGACAGTT 5'   | 3     | 1232-1252 | Squamosa promoter-binding-like protein 6-like  |
| vvi-miR156f    | VIT_217s0000g05020.3 | target | 5' GTGCTCTCTCTCTTGTGCAT 3'<br>: : : : ~ : : : : : : : : : :<br>miRNA 3' CACGAGAGATAGAAGACAGTT 5'   | 3     | 1232-1252 | Squamosa promoter-binding-like protein 6-like  |
| vvi-miR156g-5p | VIT_201s0010g03710.1 | target | 5' GTGCTCTCTCTCTTGTCAA 3'<br>: : : : ~ : : : : : : : : : :<br>miRNA 3' CACGAGAGATAGAAGACAGTT 5'    | 2     | 1145-1165 | Squamosa promoter-binding-like protein 2       |
| vvi-miR156g-5p | VIT_201s0010g03710.2 | target | 5' GTGCTCTCTCTCTTGTCAA 3'<br>: : : : ~ : : : : : : : : : :<br>miRNA 3' CACGAGAGATAGAAGACAGTT 5'    | 2     | 1208-1228 | Squamosa promoter-binding-like protein 2       |

| miRNA          | Target id            | Alignment                                                                                                          | Score | Range     | Target gene functional annotation              |
|----------------|----------------------|--------------------------------------------------------------------------------------------------------------------|-------|-----------|------------------------------------------------|
| vvi-miR156g-5p | VIT_201s0010g03710.3 | target 5' GTGCTCTCTCTCTCTGTCAA 3'<br>:                  :                  :<br>miRNA 3' CACGAGAGATAGAAGACAGTT 5'  | 2     | 1145-1165 | Squamosa promoter-binding-like protein 2       |
| vvi-miR156g-5p | VIT_201s0010g03710.4 | target 5' GTGCTCTCTCTCTCTGTCAA 3'<br>:                  :                  :<br>miRNA 3' CACGAGAGATAGAAGACAGTT 5'  | 2     | 1145-1165 | Squamosa promoter-binding-like protein 2       |
| vvi-miR156g-5p | VIT_201s0010g03710.5 | target 5' GTGCTCTCTCTCTCTGTCAA 3'<br>:                  :                  :<br>miRNA 3' CACGAGAGATAGAAGACAGTT 5'  | 2     | 1208-1228 | Squamosa promoter-binding-like protein 2       |
| vvi-miR156g-5p | VIT_201s0010g03710.6 | target 5' GTGCTCTCTCTCTCTGTCAA 3'<br>:                  :                  :<br>miRNA 3' CACGAGAGATAGAAGACAGTT 5'  | 2     | 1145-1165 | Squamosa promoter-binding-like protein 2       |
| vvi-miR156g-5p | VIT_201s0010g03910.1 | target 5' GTGCTCTCTCTCTCTGTGCAT 3'<br>:                  :                  :<br>miRNA 3' CACGAGAGATAGAAGACAGTT 5' | 3     | 881-901   | Squamosa promoter-binding-like protein 13-like |
| vvi-miR156g-5p | VIT_201s0010g03910.2 | target 5' GTGCTCTCTCTCTCTGTGCAT 3'<br>:                  :                  :<br>miRNA 3' CACGAGAGATAGAAGACAGTT 5' | 3     | 881-901   | Squamosa promoter-binding-like protein 13-like |
| vvi-miR156g-5p | VIT_201s0010g03910.3 | target 5' GTGCTCTCTCTCTCTGTGCAT 3'<br>:                  :                  :<br>miRNA 3' CACGAGAGATAGAAGACAGTT 5' | 3     | 881-901   | Squamosa promoter-binding-like protein 13-like |
| vvi-miR156g-5p | VIT_201s0011g00130.1 | target 5' GTGCTCTCTCTCTCTGTGCAG 3'<br>:                  :                  :<br>miRNA 3' CACGAGAGATAGAAGACAGTT 5' | 2.5   | 1250-1270 | Squamosa promoter-binding-like protein 6-like  |
| vvi-miR156g-5p | VIT_201s0011g00130.2 | target 5' GTGCTCTCTCTCTCTGTGCAG 3'<br>:                  :                  :<br>miRNA 3' CACGAGAGATAGAAGACAGTT 5' | 2.5   | 1250-1270 | Squamosa promoter-binding-like protein 6-like  |
| vvi-miR156g-5p | VIT_208s0007g06270.1 | target 5' GTGCTCTCTCTCTCTGTCAA 3'<br>:                  :                  :<br>miRNA 3' CACGAGAGATAGAAGACAGTT 5'  | 2     | 788-808   | Squamosa promoter-binding-like protein 9-like  |
| vvi-miR156g-5p | VIT_211s0065g00170.1 | target 5' GTGCTCTCTCTCTCTGTCAA 3'<br>:                  :                  :<br>miRNA 3' CACGAGAGATAGAAGACAGTT 5'  | 2     | 1124-1144 | Squamosa promoter-binding-like protein 12-like |
| vvi-miR156g-5p | VIT_211s0065g00170.2 | target 5' GTGCTCTCTCTCTCTGTCAA 3'<br>:                  :                  :<br>miRNA 3' CACGAGAGATAGAAGACAGTT 5'  | 2     | 1124-1144 | Squamosa promoter-binding-like protein 12-like |
| vvi-miR156g-5p | VIT_211s0065g00170.3 | target 5' GTGCTCTCTCTCTCTGTCAA 3'<br>:                  :                  :<br>miRNA 3' CACGAGAGATAGAAGACAGTT 5'  | 2     | 1124-1144 | Squamosa promoter-binding-like protein 12-like |
| vvi-miR156g-5p | VIT_211s0065g00170.4 | target 5' GTGCTCTCTCTCTCTGTCAA 3'<br>:                  :                  :<br>miRNA 3' CACGAGAGATAGAAGACAGTT 5'  | 2     | 1124-1144 | Squamosa promoter-binding-like protein 12-like |



| miRNA          | Target id            | Alignment |                                                                                 | Score | Range     | Target gene functional annotation              |
|----------------|----------------------|-----------|---------------------------------------------------------------------------------|-------|-----------|------------------------------------------------|
| vvi-miR156g-5p | VIT_211s0065g00170.5 | target    | 5' GTGCTCTCTCTCTCTGTCAA 3'<br>: : : : : : : : : : : : : : : :<br>miRNA          | 2     | 1124-1144 | Squamosa promoter-binding-like protein 12-like |
| vvi-miR156g-5p | VIT_211s0065g00170.7 | target    | 5' GTGCTCTCTCTCTCTGTCAA 3'<br>: : : : : : : : : : : : : : : :<br>miRNA          | 2     | 1124-1144 | Squamosa promoter-binding-like protein 12-like |
| vvi-miR156g-5p | VIT_215s0021g02290.1 | target    | 5' GTGCTCTCTCTCTCTGTTCAT 3'<br>: : : : : : : : : : : : : : : :<br>miRNA         | 3     | 797-817   | Squamosa promoter-binding-like protein 7-like  |
| vvi-miR156g-5p | VIT_217s0000g01260.1 | target    | 5' GTGCTCTCTCTCTCTGTTCAT 3'<br>: : : : ~ ~ ~ ~ ~ ~ ~ ~ ~ ~ ~ ~ ~ ~ ~ ~<br>miRNA | 3     | 953-973   | Squamosa promoter-binding-like protein 13      |
| vvi-miR156g-5p | VIT_217s0000g05020.1 | target    | 5' GTGCTCTCTCTCTCTGTTCAT 3'<br>: : : : ~ ~ ~ ~ ~ ~ ~ ~ ~ ~ ~ ~ ~ ~ ~ ~<br>miRNA | 3     | 1232-1252 | Squamosa promoter-binding-like protein 6-like  |
| vvi-miR156g-5p | VIT_217s0000g05020.2 | target    | 5' GTGCTCTCTCTCTCTGTTCAT 3'<br>: : : : ~ ~ ~ ~ ~ ~ ~ ~ ~ ~ ~ ~ ~ ~ ~ ~<br>miRNA | 3     | 1232-1252 | Squamosa promoter-binding-like protein 6-like  |
| vvi-miR156g-5p | VIT_217s0000g05020.3 | target    | 5' GTGCTCTCTCTCTCTGTTCAT 3'<br>: : : : ~ ~ ~ ~ ~ ~ ~ ~ ~ ~ ~ ~ ~ ~ ~ ~<br>miRNA | 3     | 1232-1252 | Squamosa promoter-binding-like protein 6-like  |
| vvi-miR156i    | VIT_201s0010g03710.1 | target    | 5' GTGCTCTCTCTCTCTGTCAA 3'<br>: : : : ~ ~ ~ ~ ~ ~ ~ ~ ~ ~ ~ ~ ~ ~ ~ ~<br>miRNA  | 2     | 1145-1165 | Squamosa promoter-binding-like protein 2       |
| vvi-miR156i    | VIT_201s0010g03710.2 | target    | 5' GTGCTCTCTCTCTCTGTCAA 3'<br>: : : : ~ ~ ~ ~ ~ ~ ~ ~ ~ ~ ~ ~ ~ ~ ~ ~<br>miRNA  | 2     | 1208-1228 | Squamosa promoter-binding-like protein 2       |
| vvi-miR156i    | VIT_201s0010g03710.3 | target    | 5' GTGCTCTCTCTCTCTGTCAA 3'<br>: : : : ~ ~ ~ ~ ~ ~ ~ ~ ~ ~ ~ ~ ~ ~ ~ ~<br>miRNA  | 2     | 1145-1165 | Squamosa promoter-binding-like protein 2       |
| vvi-miR156i    | VIT_201s0010g03710.4 | target    | 5' GTGCTCTCTCTCTCTGTCAA 3'<br>: : : : ~ ~ ~ ~ ~ ~ ~ ~ ~ ~ ~ ~ ~ ~ ~ ~<br>miRNA  | 2     | 1145-1165 | Squamosa promoter-binding-like protein 2       |
| vvi-miR156i    | VIT_201s0010g03710.5 | target    | 5' GTGCTCTCTCTCTCTGTCAA 3'<br>: : : : ~ ~ ~ ~ ~ ~ ~ ~ ~ ~ ~ ~ ~ ~ ~ ~<br>miRNA  | 2     | 1208-1228 | Squamosa promoter-binding-like protein 2       |
| vvi-miR156i    | VIT_201s0010g03710.6 | target    | 5' GTGCTCTCTCTCTCTGTCAA 3'<br>: : : : ~ ~ ~ ~ ~ ~ ~ ~ ~ ~ ~ ~ ~ ~ ~ ~<br>miRNA  | 2     | 1145-1165 | Squamosa promoter-binding-like protein 2       |
| vvi-miR156i    | VIT_201s0010g03910.1 | target    | 5' GTGCTCTCTCTCTCTGTTCAT 3'<br>: : : : ~ ~ ~ ~ ~ ~ ~ ~ ~ ~ ~ ~ ~ ~ ~ ~<br>miRNA | 3     | 881-901   | Squamosa promoter-binding-like protein 13-like |



| miRNA            | Target id            | Alignment                                                                                                | Score | Range     | Target gene functional annotation                       |
|------------------|----------------------|----------------------------------------------------------------------------------------------------------|-------|-----------|---------------------------------------------------------|
| vvi-miR156i      | VIT_217s0000g05020.2 | target 5' GTGCTCTCTCTCTCTGTCAT 3'<br>:::          :::          :::<br>miRNA 3' CACGAGAGATAGAAGACAGTT 5'  | 3     | 1232-1252 | Squamosa promoter-binding-like protein 6-like           |
| vvi-miR156i      | VIT_217s0000g05020.3 | target 5' GTGCTCTCTCTCTCTGTCAT 3'<br>:::          :::          :::<br>miRNA 3' CACGAGAGATAGAAGACAGTT 5'  | 3     | 1232-1252 | Squamosa promoter-binding-like protein 6-like           |
| vvi-miR159a      | VIT_200s0226g00070.1 | target 5' CAGAACTCTCTTCACTCCAA 3'<br>:::          :::          :::<br>miRNA 3' CTCTCGAGGGAAGTGAGGTT 5'   | 3     | 25-Jun    | Gras family transcription factor                        |
| vvi-miR159a      | VIT_202s0025g04120.1 | target 5' GAGAGGTCCCTTCACTCCCA 3'<br>:::          :::          :::<br>miRNA 3' CTCTCGAGGGAAGTGAGGTT 5'   | 3     | 1143-1162 | Calmodulin binding                                      |
| vvi-miR159a      | VIT_203s0038g01150.1 | target 5' GA-AGCACCCCTTCATTCCAA 3'<br>:::          :::          :::<br>miRNA 3' CTCTCGAGGGAAGTGAGGTT 5'  | 3     | 153-171   | Auxin-induced protein 10a5                              |
| vvi-miR159a      | VIT_213s0067g01630.1 | target 5' TGGAGCTCCCTTCACTCCAA 3'<br>.:          .:          .:<br>miRNA 3' CTCTCGAGGGAAGTGAGGTT 5'      | 1.5   | 956-975   | Transcription factor gamyb-like                         |
| vvi-miR159c.1-3p | VIT_219s0014g01700.1 | target 5' TAGAGCCCCCTTCAAACAAA 3'<br>:::          :::          :::<br>miRNA 3' ATCTCGAGGGAAGTTAGGTTT 5'  | 3     | 659-679   | Uncharacterized protein loc100505457                    |
| vvi-miR159c.1-5p | VIT_201s0011g06470.1 | target 5' CTATTGGCCTACAAGGAGCTC 3'<br>:::          :::          :::<br>miRNA 3' GATAACCTGAAGTTCCTCGAG 5' | 3     | 336-356   | Probable nad h-dependent oxidoreductase 1               |
| vvi-miR159c.1-5p | VIT_201s0011g06470.2 | target 5' CTATTGGCCTACAAGGAGCTC 3'<br>:::          :::          :::<br>miRNA 3' GATAACCTGAAGTTCCTCGAG 5' | 3     | 336-356   | Probable nad h-dependent oxidoreductase 1               |
| vvi-miR159c.1-5p | VIT_201s0011g06470.3 | target 5' CTATTGGCCTACAAGGAGCTC 3'<br>:::          :::          :::<br>miRNA 3' GATAACCTGAAGTTCCTCGAG 5' | 3     | 336-356   | Probable nad h-dependent oxidoreductase 1               |
| vvi-miR159c.1-5p | VIT_201s0011g06470.4 | target 5' CTATTGGCCTACAAGGAGCTC 3'<br>:::          :::          :::<br>miRNA 3' GATAACCTGAAGTTCCTCGAG 5' | 3     | 336-356   | Probable nad h-dependent oxidoreductase 1               |
| vvi-miR159c.1-5p | VIT_201s0011g06470.5 | target 5' CTATTGGCCTACAAGGAGCTC 3'<br>:::          :::          :::<br>miRNA 3' GATAACCTGAAGTTCCTCGAG 5' | 3     | 336-356   | Probable nad h-dependent oxidoreductase 1               |
| vvi-miR159c.2-3p | VIT_207s0031g00480.1 | target 5' GTAGCTCCTGA-ATATGCAAG 3'<br>.:          .:          .:<br>miRNA 3' CGTCGAGGACTCTATACGTTT 5'    | 2.5   | 1027-1046 | Probable serine threonine-protein kinase at1g01540-like |
| vvi-miR160c      | VIT_206s0004g02750.1 | target 5' AGGCATACAGGGAGCCAGGCA 3'<br>.:          .:          .:<br>miRNA 3' ACCGTATGTCCCTCGGTCCGT 5'    | 1     | 1320-1340 | Auxin response factor 18-like                           |

| miRNA       | Target id             | Alignment                             |                                      | Score | Range     | Target gene functional annotation |
|-------------|-----------------------|---------------------------------------|--------------------------------------|-------|-----------|-----------------------------------|
| vvi-miR160c | VIT_206s0004g02750.2  | target<br>5' AGGCATACAGGGAGCCAGGCA 3' | miRNA<br>3' ACCGTATGTCCCTCGGTCCGT 5' | 1     | 1320-1340 | Auxin response factor 18-like     |
| vvi-miR160c | VIT_206s0004g02750.3  | target<br>5' AGGCATACAGGGAGCCAGGCA 3' | miRNA<br>3' ACCGTATGTCCCTCGGTCCGT 5' | 1     | 1320-1340 | Auxin response factor 18-like     |
| vvi-miR160c | VIT_206s0004g02750.4  | target<br>5' AGGCATACAGGGAGCCAGGCA 3' | miRNA<br>3' ACCGTATGTCCCTCGGTCCGT 5' | 1     | 1320-1340 | Auxin response factor 18-like     |
| vvi-miR160c | VIT_206s0004g02750.5  | target<br>5' AGGCATACAGGGAGCCAGGCA 3' | miRNA<br>3' ACCGTATGTCCCTCGGTCCGT 5' | 1     | 1320-1340 | Auxin response factor 18-like     |
| vvi-miR160c | VIT_208s0004g01810.1  | target<br>5' TGGCATGCAGGGAGCCAGGCA 3' | miRNA<br>3' ACCGTATGTCCCTCGGTCCGT 5' | 0.5   | 1353-1373 | Auxin response factor 18-like     |
| vvi-miR160c | VIT_208s0004g01810.2  | target<br>5' TGGCATGCAGGGAGCCAGGCA 3' | miRNA<br>3' ACCGTATGTCCCTCGGTCCGT 5' | 0.5   | 1353-1373 | Auxin response factor 18-like     |
| vvi-miR160c | VIT_208s0004g01810.3  | target<br>5' TGGCATGCAGGGAGCCAGGCA 3' | miRNA<br>3' ACCGTATGTCCCTCGGTCCGT 5' | 0.5   | 1353-1373 | Auxin response factor 18-like     |
| vvi-miR160c | VIT_208s0004g01810.4  | target<br>5' TGGCATGCAGGGAGCCAGGCA 3' | miRNA<br>3' ACCGTATGTCCCTCGGTCCGT 5' | 0.5   | 1353-1373 | Auxin response factor 18-like     |
| vvi-miR160c | VIT_213s00019g04380.1 | target<br>5' AGGCATACAGGGAGCCAGGCA 3' | miRNA<br>3' ACCGTATGTCCCTCGGTCCGT 5' | 1     | 1326-1346 | Protein                           |
| vvi-miR160c | VIT_213s00019g04380.2 | target<br>5' AGGCATACAGGGAGCCAGGCA 3' | miRNA<br>3' ACCGTATGTCCCTCGGTCCGT 5' | 1     | 1326-1346 | Protein                           |
| vvi-miR160c | VIT_213s00019g04380.3 | target<br>5' AGGCATACAGGGAGCCAGGCA 3' | miRNA<br>3' ACCGTATGTCCCTCGGTCCGT 5' | 1     | 1326-1346 | Protein                           |
| vvi-miR160c | VIT_213s00019g04380.4 | target<br>5' AGGCATACAGGGAGCCAGGCA 3' | miRNA<br>3' ACCGTATGTCCCTCGGTCCGT 5' | 1     | 1326-1346 | Protein                           |
| vvi-miR160c | VIT_218s0001g04180.1  | target<br>5' TGGCATGCAGGGAGCCAGGCA 3' | miRNA<br>3' ACCGTATGTCCCTCGGTCCGT 5' | 0.5   | 1293-1313 | Auxin response                    |
| vvi-miR160c | VIT_218s0001g04180.2  | target<br>5' TGGCATGCAGGGAGCCAGGCA 3' | miRNA<br>3' ACCGTATGTCCCTCGGTCCGT 5' | 0.5   | 1293-1313 | Auxin response                    |











| miRNA          | Target id            | Alignment                                                                                                          | Score | Range     | Target gene functional annotation          |
|----------------|----------------------|--------------------------------------------------------------------------------------------------------------------|-------|-----------|--------------------------------------------|
| vvi-miR166a-3p | VIT_218s0075g00480.4 | target 5' GGAATGAAGTATGGTCCGAGA 3'<br>:                  :                  :<br>miRNA 3' CCTTACTTCGGACCAGGCTCT 5' | 3     | 950-970   | Tmv resistance protein n-like              |
| vvi-miR166a-3p | VIT_218s0075g00480.5 | target 5' GGAATGAAGTATGGTCCGAGA 3'<br>:                  :                  :<br>miRNA 3' CCTTACTTCGGACCAGGCTCT 5' | 3     | 2612-2632 | Tmv resistance protein n-like              |
| vvi-miR166a-3p | VIT_218s0075g00480.6 | target 5' GGAATGAAGTATGGTCCGAGA 3'<br>:                  :                  :<br>miRNA 3' CCTTACTTCGGACCAGGCTCT 5' | 3     | 479-499   | Tmv resistance protein n-like              |
| vvi-miR166a-3p | VIT_218s0075g00480.7 | target 5' GGAATGAAGTATGGTCCGAGA 3'<br>:                  :                  :<br>miRNA 3' CCTTACTTCGGACCAGGCTCT 5' | 3     | 950-970   | Tmv resistance protein n-like              |
| vvi-miR166b-3p | VIT_204s0008g03250.1 | target 5' CTGGGATGAAGCCTGGTCCGG 3'<br>:                  :                  :<br>miRNA 3' CTCCTTACTTCGGACCAGGCT 5' | 3     | 557-577   | Protein                                    |
| vvi-miR166b-3p | VIT_204s0008g03250.2 | target 5' CTGGGATGAAGCCTGGTCCGG 3'<br>:                  :                  :<br>miRNA 3' CTCCTTACTTCGGACCAGGCT 5' | 3     | 557-577   | Class iii hd-zip protein 8                 |
| vvi-miR166b-3p | VIT_206s0004g02800.1 | target 5' CTGGGATGAAGCCTGGTCCGG 3'<br>:                  :                  :<br>miRNA 3' CTCCTTACTTCGGACCAGGCT 5' | 3     | 563-583   | Homeobox leucine-zipper protein            |
| vvi-miR166b-3p | VIT_206s0004g02800.2 | target 5' CTGGGATGAAGCCTGGTCCGG 3'<br>:                  :                  :<br>miRNA 3' CTCCTTACTTCGGACCAGGCT 5' | 3     | 563-583   | Homeobox leucine-zipper protein            |
| vvi-miR166b-3p | VIT_206s0004g02800.3 | target 5' CTGGGATGAAGCCTGGTCCGG 3'<br>:                  :                  :<br>miRNA 3' CTCCTTACTTCGGACCAGGCT 5' | 3     | 563-583   | Homeobox leucine-zipper protein            |
| vvi-miR166b-3p | VIT_209s0002g03740.1 | target 5' CTGGAATGAAGCCTGGTCCGG 3'<br>:                  :                  :<br>miRNA 3' CTCCTTACTTCGGACCAGGCT 5' | 2.5   | 551-571   | Homeobox-leucine zipper protein athb-15    |
| vvi-miR166b-3p | VIT_210s0003g04670.1 | target 5' TTGGGATGAAGCCTGGTCCGG 3'<br>:                  :                  :<br>miRNA 3' CTCCTTACTTCGGACCAGGCT 5' | 3     | 566-586   | Homeobox-leucine zipper protein hox32-like |
| vvi-miR166b-3p | VIT_210s0003g04670.2 | target 5' TTGGGATGAAGCCTGGTCCGG 3'<br>:                  :                  :<br>miRNA 3' CTCCTTACTTCGGACCAGGCT 5' | 3     | 293-313   | Homeobox-leucine zipper protein hox32-like |
| vvi-miR166b-3p | VIT_210s0003g04670.3 | target 5' TTGGGATGAAGCCTGGTCCGG 3'<br>:                  :                  :<br>miRNA 3' CTCCTTACTTCGGACCAGGCT 5' | 3     | 25-May    | Homeobox-leucine zipper protein hox32-like |
| vvi-miR166b-3p | VIT_213s0019g04320.1 | target 5' CTGGGATGAAGCCTGGTCCGG 3'<br>:                  :                  :<br>miRNA 3' CTCCTTACTTCGGACCAGGCT 5' | 3     | 263-283   | Homeobox-leucine zipper protein revoluta   |

| miRNA          | Target id            | Alignment                          |    | Score | Range   | Target gene functional annotation          |
|----------------|----------------------|------------------------------------|----|-------|---------|--------------------------------------------|
| vvi-miR166b-3p | VIT_213s0019g04320.2 | target 5' CTGGGATGAAGCCTGGTCCGG 3' | 3' | 3     | 263-283 | Homeobox-leucine zipper protein revoluta   |
|                |                      | miRNA 3' CTCCTTACTTCGGACCAGGCT 5'  |    |       |         |                                            |
| vvi-miR166b-3p | VIT_213s0019g04320.3 | target 5' CTGGGATGAAGCCTGGTCCGG 3' | 3' | 3     | 263-283 | Homeobox-leucine zipper protein revoluta   |
|                |                      | miRNA 3' CTCCTTACTTCGGACCAGGCT 5'  |    |       |         |                                            |
| vvi-miR166b-3p | VIT_213s0019g04320.4 | target 5' CTGGGATGAAGCCTGGTCCGG 3' | 3' | 3     | 263-283 | Homeobox-leucine zipper protein revoluta   |
|                |                      | miRNA 3' CTCCTTACTTCGGACCAGGCT 5'  |    |       |         |                                            |
| vvi-miR166b-3p | VIT_213s0019g04320.5 | target 5' CTGGGATGAAGCCTGGTCCGG 3' | 3' | 3     | 173-193 | Homeobox-leucine zipper protein revoluta   |
|                |                      | miRNA 3' CTCCTTACTTCGGACCAGGCT 5'  |    |       |         |                                            |
| vvi-miR166b-3p | VIT_213s0019g04320.6 | target 5' CTGGGATGAAGCCTGGTCCGG 3' | 3' | 3     | 263-283 | Homeobox-leucine zipper protein revoluta   |
|                |                      | miRNA 3' CTCCTTACTTCGGACCAGGCT 5'  |    |       |         |                                            |
| vvi-miR166b-3p | VIT_213s0019g04320.7 | target 5' CTGGGATGAAGCCTGGTCCGG 3' | 3' | 3     | 263-283 | Homeobox-leucine zipper protein revoluta   |
|                |                      | miRNA 3' CTCCTTACTTCGGACCAGGCT 5'  |    |       |         |                                            |
| vvi-miR166c-3p | VIT_204s0008g03250.1 | target 5' CTGGGATGAAGCCTGGTCCGG 3' | 3' | 3     | 557-577 | Protein                                    |
|                |                      | miRNA 3' CCCCTTACTTCGGACCAGGCT 5'  |    |       |         |                                            |
| vvi-miR166c-3p | VIT_204s0008g03250.2 | target 5' CTGGGATGAAGCCTGGTCCGG 3' | 3' | 3     | 557-577 | Class iii hd-zip protein 8                 |
|                |                      | miRNA 3' CCCCTTACTTCGGACCAGGCT 5'  |    |       |         |                                            |
| vvi-miR166c-3p | VIT_206s0004g02800.1 | target 5' CTGGGATGAAGCCTGGTCCGG 3' | 3' | 3     | 563-583 | Homeobox leucine-zipper protein            |
|                |                      | miRNA 3' CCCCTTACTTCGGACCAGGCT 5'  |    |       |         |                                            |
| vvi-miR166c-3p | VIT_206s0004g02800.2 | target 5' CTGGGATGAAGCCTGGTCCGG 3' | 3' | 3     | 563-583 | Homeobox leucine-zipper protein            |
|                |                      | miRNA 3' CCCCTTACTTCGGACCAGGCT 5'  |    |       |         |                                            |
| vvi-miR166c-3p | VIT_206s0004g02800.3 | target 5' CTGGGATGAAGCCTGGTCCGG 3' | 3' | 3     | 563-583 | Homeobox leucine-zipper protein            |
|                |                      | miRNA 3' CCCCTTACTTCGGACCAGGCT 5'  |    |       |         |                                            |
| vvi-miR166c-3p | VIT_209s0002g03740.1 | target 5' CTGGAATGAAGCCTGGTCCGG 3' | 3' | 2.5   | 551-571 | Homeobox-leucine zipper protein athb-15    |
|                |                      | miRNA 3' CCCCTTACTTCGGACCAGGCT 5'  |    |       |         |                                            |
| vvi-miR166c-3p | VIT_210s0003g04670.1 | target 5' TTGGGATGAAGCCTGGTCCGG 3' | 3' | 3     | 566-586 | Homeobox-leucine zipper protein hox32-like |
|                |                      | miRNA 3' CCCCTTACTTCGGACCAGGCT 5'  |    |       |         |                                            |
| vvi-miR166c-3p | VIT_210s0003g04670.2 | target 5' TTGGGATGAAGCCTGGTCCGG 3' | 3' | 3     | 293-313 | Homeobox-leucine zipper protein hox32-like |
|                |                      | miRNA 3' CCCCTTACTTCGGACCAGGCT 5'  |    |       |         |                                            |



| miRNA          | Target id            | Alignment                                                                        | Score | Range     | Target gene functional annotation          |
|----------------|----------------------|----------------------------------------------------------------------------------|-------|-----------|--------------------------------------------|
| vvi-miR166d-3p | VIT_210s0003g04670.1 | target 5' TTGGGATGAAGCCTGGTCCGG 3'<br>:::<br>miRNA 3' CCCCTTACTTCGGACCAGGCT 5'   | 3     | 566-586   | Homeobox-leucine zipper protein hox32-like |
| vvi-miR166d-3p | VIT_210s0003g04670.2 | target 5' TTGGGATGAAGCCTGGTCCGG 3'<br>:::<br>miRNA 3' CCCCTTACTTCGGACCAGGCT 5'   | 3     | 293-313   | Homeobox-leucine zipper protein hox32-like |
| vvi-miR166d-3p | VIT_210s0003g04670.3 | target 5' TTGGGATGAAGCCTGGTCCGG 3'<br>:::<br>miRNA 3' CCCCTTACTTCGGACCAGGCT 5'   | 3     | 25-May    | Homeobox-leucine zipper protein hox32-like |
| vvi-miR166d-3p | VIT_213s0019g04320.1 | target 5' CTGGGATGAAGCCTGGTCCGG 3'<br>:::<br>miRNA 3' CCCCTTACTTCGGACCAGGCT 5'   | 3     | 263-283   | Homeobox-leucine zipper protein revoluta   |
| vvi-miR166d-3p | VIT_213s0019g04320.2 | target 5' CTGGGATGAAGCCTGGTCCGG 3'<br>:::<br>miRNA 3' CCCCTTACTTCGGACCAGGCT 5'   | 3     | 263-283   | Homeobox-leucine zipper protein revoluta   |
| vvi-miR166d-3p | VIT_213s0019g04320.3 | target 5' CTGGGATGAAGCCTGGTCCGG 3'<br>:::<br>miRNA 3' CCCCTTACTTCGGACCAGGCT 5'   | 3     | 263-283   | Homeobox-leucine zipper protein revoluta   |
| vvi-miR166d-3p | VIT_213s0019g04320.4 | target 5' CTGGGATGAAGCCTGGTCCGG 3'<br>:::<br>miRNA 3' CCCCTTACTTCGGACCAGGCT 5'   | 3     | 263-283   | Homeobox-leucine zipper protein revoluta   |
| vvi-miR166d-3p | VIT_213s0019g04320.5 | target 5' CTGGGATGAAGCCTGGTCCGG 3'<br>:::<br>miRNA 3' CCCCTTACTTCGGACCAGGCT 5'   | 3     | 173-193   | Homeobox-leucine zipper protein revoluta   |
| vvi-miR166d-3p | VIT_213s0019g04320.6 | target 5' CTGGGATGAAGCCTGGTCCGG 3'<br>:::<br>miRNA 3' CCCCTTACTTCGGACCAGGCT 5'   | 3     | 263-283   | Homeobox-leucine zipper protein revoluta   |
| vvi-miR166d-3p | VIT_213s0019g04320.7 | target 5' CTGGGATGAAGCCTGGTCCGG 3'<br>:::<br>miRNA 3' CCCCTTACTTCGGACCAGGCT 5'   | 3     | 263-283   | Homeobox-leucine zipper protein revoluta   |
| vvi-miR166d-5p | VIT_208s0056g01350.1 | target 5' GCCTCAGACCAGACAACAATC 3'<br>::: . :<br>miRNA 3' CGGAGCTCGGTCTGTGTAG 5' | 2.5   | 1750-1770 | Protein                                    |
| vvi-miR166e-3p | VIT_204s0008g03250.1 | target 5' CTGGGATGAAGCCTGGTCCGG 3'<br>:::<br>miRNA 3' CCCCTTACTTCGGACCAGGCT 5'   | 3     | 557-577   | Protein                                    |
| vvi-miR166e-3p | VIT_204s0008g03250.2 | target 5' CTGGGATGAAGCCTGGTCCGG 3'<br>:::<br>miRNA 3' CCCCTTACTTCGGACCAGGCT 5'   | 3     | 557-577   | Class iii hd-zip protein 8                 |
| vvi-miR166e-3p | VIT_206s0004g02800.1 | target 5' CTGGGATGAAGCCTGGTCCGG 3'<br>:::<br>miRNA 3' CCCCTTACTTCGGACCAGGCT 5'   | 3     | 563-583   | Homeobox leucine-zipper protein            |











| <b>miRNA</b>   | <b>Target id</b>     | <b>Alignment</b>                    |       | <b>Score</b> | <b>Range</b> | <b>Target gene functional annotation</b>                       |
|----------------|----------------------|-------------------------------------|-------|--------------|--------------|----------------------------------------------------------------|
| vvi-miR166h-3p | VIT_213s0019g04320.3 | target 5' CTGGGATGAAGCCTGGTCCGG 3'  | ..... | 3            | 263-283      | Homeobox-leucine zipper protein revoluta                       |
|                |                      | miRNA 3' CCCCTTACTTCGGACCAGGCT 5'   |       |              |              |                                                                |
| vvi-miR166h-3p | VIT_213s0019g04320.4 | target 5' CTGGGATGAAGCCTGGTCCGG 3'  | ..... | 3            | 263-283      | Homeobox-leucine zipper protein revoluta                       |
|                |                      | miRNA 3' CCCCTTACTTCGGACCAGGCT 5'   |       |              |              |                                                                |
| vvi-miR166h-3p | VIT_213s0019g04320.5 | target 5' CTGGGATGAAGCCTGGTCCGG 3'  | ..... | 3            | 173-193      | Homeobox-leucine zipper protein revoluta                       |
|                |                      | miRNA 3' CCCCTTACTTCGGACCAGGCT 5'   |       |              |              |                                                                |
| vvi-miR166h-3p | VIT_213s0019g04320.6 | target 5' CTGGGATGAAGCCTGGTCCGG 3'  | ..... | 3            | 263-283      | Homeobox-leucine zipper protein revoluta                       |
|                |                      | miRNA 3' CCCCTTACTTCGGACCAGGCT 5'   |       |              |              |                                                                |
| vvi-miR166h-3p | VIT_213s0019g04320.7 | target 5' CTGGGATGAAGCCTGGTCCGG 3'  | ..... | 3            | 263-283      | Homeobox-leucine zipper protein revoluta                       |
|                |                      | miRNA 3' CCCCTTACTTCGGACCAGGCT 5'   |       |              |              |                                                                |
| vvi-miR168-3p  | VIT_208s0007g07890.1 | target 5' GTTTAGGTGATGCAAGGCGGG 3'  | ..... | 2            | 347-367      | Pentatricopeptide repeat-containing protein mitochondrial-like |
|                |                      | miRNA 3' TAAGTCAACTACGTTCCGCC 5'    |       |              |              |                                                                |
| vvi-miR169k-3p | VIT_206s0004g00450.1 | target 5' GGTGGTCTAGGACAACCTGCT 3'  | ..... | 2.5          | 5188-5208    | Rna polymerase ii transcription mediator                       |
|                |                      | miRNA 3' CCATCGGTTCCCTGTTGGACGG 5'  |       |              |              |                                                                |
| vvi-miR169k-3p | VIT_206s0004g00450.2 | target 5' GGTGGTCTAGGACAACCTGCT 3'  | ..... | 2.5          | 5188-5208    | Rna polymerase ii transcription mediator                       |
|                |                      | miRNA 3' CCATCGGTTCCCTGTTGGACGG 5'  |       |              |              |                                                                |
| vvi-miR169w-3p | VIT_204s0008g03660.1 | target 5' GATGAGAAGAATGAGGCAGAAA 3' | ..... | 3            | 118-139      | Embyo flowering 1-like protein                                 |
|                |                      | miRNA 3' GTACTCTTC-TACTCCGTCTTT 5'  |       |              |              |                                                                |
| vvi-miR169w-3p | VIT_204s0008g03660.2 | target 5' GATGAGAAGAATGAGGCAGAAA 3' | ..... | 3            | 118-139      | Embyo flowering 1-like protein                                 |
|                |                      | miRNA 3' GTACTCTTC-TACTCCGTCTTT 5'  |       |              |              |                                                                |
| vvi-miR169w-3p | VIT_212s0028g03940.1 | target 5' TATG-GAGGATGAGGCAGAAC 3'  | ..... | 3            | 933-952      | Histone acetyltransferase                                      |
|                |                      | miRNA 3' GTACTCTTCTACTCCGTCTTT 5'   |       |              |              |                                                                |
| vvi-miR169w-3p | VIT_212s0028g03940.2 | target 5' TATG-GAGGATGAGGCAGAAC 3'  | ..... | 3            | 933-952      | Histone acetyltransferase                                      |
|                |                      | miRNA 3' GTACTCTTCTACTCCGTCTTT 5'   |       |              |              |                                                                |
| vvi-miR169w-3p | VIT_212s0028g03940.3 | target 5' TATG-GAGGATGAGGCAGAAC 3'  | ..... | 3            | 933-952      | Histone acetyltransferase                                      |
|                |                      | miRNA 3' GTACTCTTCTACTCCGTCTTT 5'   |       |              |              |                                                                |
| vvi-miR169w-3p | VIT_212s0028g03940.4 | target 5' TATG-GAGGATGAGGCAGAAC 3'  | ..... | 3            | 834-853      | Histone acetyltransferase                                      |
|                |                      | miRNA 3' GTACTCTTCTACTCCGTCTTT 5'   |       |              |              |                                                                |



| miRNA          | Target id            | Alignment                                                                                                                                  | Score | Range     | Target gene functional annotation                    |
|----------------|----------------------|--------------------------------------------------------------------------------------------------------------------------------------------|-------|-----------|------------------------------------------------------|
| vvi-miR171h    | VIT_212s0059g00650.1 | target 5' CGGGATATTGGTGCGGTTCAA 3'<br>::: : : : : : : : : : : : : : :<br>miRNA 3' GCCCTATAACCGCGCCGAGTT 5'                                 | 1     | 142-166   | Hypothetical protein                                 |
| vvi-miR171h    | VIT_215s0048g00270.1 | target 5' AGGGATATTGGCGCGGCTCAA 3'<br>: : : : : : : : : : : : : : : : :<br>miRNA 3' GCCCTATAACCGCGCCGAGTT 5'                               | 1     | 1230-1250 | Gras family transcription factor                     |
| vvi-miR172c-3p | VIT_206s0004g03590.1 | target 5' CTGCAGCATCATCAGGATTCT 3'<br>: : : : : : : : : : : : : : : :<br>miRNA 3' GACGTCGTAGTAGTTCTAAGG 5'                                 | 1.5   | 1334-1354 | Ethylene-responsive transcription factor rap2-7-like |
| vvi-miR172c-3p | VIT_206s0004g03590.3 | target 5' CTGCAGCATCATCAGGATTCT 3'<br>: : : : : : : : : : : : : : : :<br>miRNA 3' GACGTCGTAGTAGTTCTAAGG 5'                                 | 1.5   | 1289-1309 | Ethylene-responsive transcription factor rap2-7-like |
| vvi-miR172c-3p | VIT_207s0031g00220.1 | target 5' CTGCAGCATCATCAGGATTCC 3'<br>: : : : : : : : : : : : : : : :<br>miRNA 3' GACGTCGTAGTAGTTCTAAGG 5'                                 | 1     | 1430-1450 | Transcription factor apetala2                        |
| vvi-miR172c-3p | VIT_207s0031g00220.2 | target 5' CTGCAGCATCATCAGGATTCC 3'<br>: : : : : : : : : : : : : : : :<br>miRNA 3' GACGTCGTAGTAGTTCTAAGG 5'                                 | 1     | 1442-1462 | Transcription factor apetala2                        |
| vvi-miR172c-3p | VIT_208s0040g03180.1 | target 5' CTGCAGCATCATCAGGATTCT 3'<br>: : : : : : : : : : : : : : : :<br>miRNA 3' GACGTCGTAGTAGTTCTAAGG 5'                                 | 1.5   | 1331-1351 | Ap2 domain-containing transcription factor           |
| vvi-miR172c-3p | VIT_213s0019g03550.1 | target 5' CTGCAGCATCATCAGGATTCC 3'<br>: : : : : : : : : : : : : : : :<br>miRNA 3' GACGTCGTAGTAGTTCTAAGG 5'                                 | 1     | 1304-1324 | Ap2 domain-containing transcription factor           |
| vvi-miR172c-3p | VIT_213s0019g03550.2 | target 5' CTGCAGCATCATCAGGATTCC 3'<br>: : : : : : : : : : : : : : : :<br>miRNA 3' GACGTCGTAGTAGTTCTAAGG 5'                                 | 1     | 1259-1279 | Ap2 domain-containing transcription factor           |
| vvi-miR172c-5p | VIT_207s0191g00170.1 | target 5' TGTA AAAACTTGATGATGCTCA 3'<br>: : : : : : : : : : : : : : : :<br>miRNA 3' A C A C T T A G A A C T A C T A C G A G G 5'           | 3     | 573-593   | Lmbr1 domain-containing protein 2 homolog a-like     |
| vvi-miR172c-5p | VIT_207s0191g00170.2 | target 5' TGTA AAAACTTGATGATGCTCA 3'<br>: : : : : : : : : : : : : : : :<br>miRNA 3' A C A C T T A G A A C T A C T A C G A G G 5'           | 3     | 183-203   | Lmbr1 domain-containing protein 2 homolog a-like     |
| vvi-miR172c-5p | VIT_207s0191g00170.3 | target 5' TGTA AAAACTTGATGATGCTCA 3'<br>: : : : : : : : : : : : : : : :<br>miRNA 3' A C A C T T A G A A C T A C T A C G A G G 5'           | 3     | 573-593   | Lmbr1 domain-containing protein 2 homolog a-like     |
| vvi-miR172c-5p | VIT_207s0191g00170.6 | target 5' TGTA AAAACTTGATGATGCTCA 3'<br>: : : : : : : : : : ~ : : : : : : : : : :<br>miRNA 3' A C A C T T A G A A C T A C T A C G A G G 5' | 3     | 573-593   | Lmbr1 domain-containing protein 2 homolog a-like     |
| vvi-miR172c-5p | VIT_207s0191g00170.7 | target 5' TGTA AAAACTTGATGATGCTCA 3'<br>: : : : : : : : : : ~ : : : : : : : : : :<br>miRNA 3' A C A C T T A G A A C T A C T A C G A G G 5' | 3     | 573-593   | Lmbr1 domain-containing protein 2 homolog a-like     |

| miRNA          | Target id            | Alignment                                                                                              | Score | Range     | Target gene functional annotation                          |
|----------------|----------------------|--------------------------------------------------------------------------------------------------------|-------|-----------|------------------------------------------------------------|
| vvi-miR172c-5p | VIT_207s0191g00170.8 | target 5' TGTAAACTTGATGATGCTCA 3'<br>::: :: : : : : : : : : : :<br>miRNA 3' AACTTAGAACTACTACGAGG 5'    | 3     | 183-203   | Lmbr1 domain-containing protein 2 homolog a-like           |
| vvi-miR172c-5p | VIT_208s0007g05895.1 | target 5' TGTGAGTGTGATGATGCTCT 3'<br>: : : : : : : : : : :<br>miRNA 3' AACTTAGAACTACTACGAGG 5'         | 2     | 702-722   | F-box family protein                                       |
| vvi-miR172d    | VIT_200s0184g00102.1 | target 5' GCATTCATGATCAAGATTCTCA 3'<br>::: ::: : : : : : : : : :<br>miRNA 3' CGT-CGTAGTAGTTCTAAGAGT 5' | 3     | 215-236   | Ap2 erf and b3 domain-containing transcription factor rav2 |
| vvi-miR172d    | VIT_206s0004g03590.1 | target 5' GCAGCATCATCAGGATTCTCA 3'<br>: : : : : : : : : : :<br>miRNA 3' CGTCGTAGTAGTTCTAAGAGT 5'       | 1     | 1336-1356 | Ethylene-responsive transcription factor rap2-7-like       |
| vvi-miR172d    | VIT_206s0004g03590.3 | target 5' GCAGCATCATCAGGATTCTCA 3'<br>: : : : : : : : : : :<br>miRNA 3' CGTCGTAGTAGTTCTAAGAGT 5'       | 1     | 1291-1311 | Ethylene-responsive transcription factor rap2-7-like       |
| vvi-miR172d    | VIT_207s0031g00220.1 | target 5' GCAGCATCATCAGGATTCCCA 3'<br>: : : : : : : : : : :<br>miRNA 3' CGTCGTAGTAGTTCTAAGAGT 5'       | 3     | 1432-1452 | Transcription factor apetala2                              |
| vvi-miR172d    | VIT_207s0031g00220.2 | target 5' GCAGCATCATCAGGATTCCCA 3'<br>: : : : : : : : : : :<br>miRNA 3' CGTCGTAGTAGTTCTAAGAGT 5'       | 3     | 1444-1464 | Transcription factor apetala2                              |
| vvi-miR172d    | VIT_208s0040g03180.1 | target 5' GCAGCATCATCAGGATTCTTG 3'<br>: : : : : : : : : : :<br>miRNA 3' CGTCGTAGTAGTTCTAAGAGT 5'       | 2.5   | 1333-1353 | Ap2 domain-containing transcription factor                 |
| vvi-miR2111-3p | VIT_209s0002g02550.1 | target 5' AGTAAT-TGCAACCAGAGGAT 3'<br>: : : : : : : : : : :<br>miRNA 3' TCATTAGACGTTGGTCTCCTG 5'       | 1.5   | 955-974   | Tudor pwwp mbt superfamily protein                         |
| vvi-miR2111-3p | VIT_209s0002g02550.2 | target 5' AGTAAT-TGCAACCAGAGGAT 3'<br>: : : : : : : : : : :<br>miRNA 3' TCATTAGACGTTGGTCTCCTG 5'       | 1.5   | 1399-1418 | Tudor pwwp mbt superfamily protein                         |
| vvi-miR2111-3p | VIT_209s0002g02550.3 | target 5' AGTAAT-TGCAACCAGAGGAT 3'<br>: : : : : : : : : : :<br>miRNA 3' TCATTAGACGTTGGTCTCCTG 5'       | 1.5   | 955-974   | Tudor pwwp mbt superfamily protein                         |
| vvi-miR2111-3p | VIT_209s0002g02550.4 | target 5' AGTAAT-TGCAACCAGAGGAT 3'<br>: : : : ~ : : : : : : : :<br>miRNA 3' TCATTAGACGTTGGTCTCCTG 5'   | 1.5   | 955-974   | Tudor pwwp mbt superfamily protein                         |
| vvi-miR2111-3p | VIT_209s0002g02550.5 | target 5' AGTAAT-TGCAACCAGAGGAT 3'<br>: : : : ~ : : : : : : : :<br>miRNA 3' TCATTAGACGTTGGTCTCCTG 5'   | 1.5   | 955-974   | Tudor pwwp mbt superfamily protein                         |
| vvi-miR2111-3p | VIT_209s0002g02550.6 | target 5' AGTAAT-TGCAACCAGAGGAT 3'<br>: : : : ~ : : : : ~ : : :<br>miRNA 3' TCATTAGACGTTGGTCTCCTG 5'   | 1.5   | 955-974   | Tudor pwwp mbt superfamily protein                         |

| miRNA          | Target id            | Alignment                                                                           | Score | Range   | Target gene functional annotation         |
|----------------|----------------------|-------------------------------------------------------------------------------------|-------|---------|-------------------------------------------|
| vvi-miR2111-5p | VIT_214s0068g02150.1 | target 5' TAGATACTCAGGATGCAGATTA 3'<br>:::: :<br>miRNA 3' ATCTG-GAGTCCTACGTCTAAT 5' | 1.5   | 239-260 | F-box kelch-repeat protein at3g27150-like |
| vvi-miR2111-5p | VIT_214s0068g02150.2 | target 5' TAGATACTCAGGATGCAGATTA 3'<br>:::: :<br>miRNA 3' ATCTG-GAGTCCTACGTCTAAT 5' | 1.5   | 239-260 | F-box kelch-repeat protein at3g27150-like |
| vvi-miR2111-5p | VIT_214s0068g02150.3 | target 5' TAGATACTCAGGATGCAGATTA 3'<br>:::: :<br>miRNA 3' ATCTG-GAGTCCTACGTCTAAT 5' | 1.5   | 410-431 | F-box kelch-repeat protein at3g27150-like |
| vvi-miR2111-5p | VIT_214s0068g02150.4 | target 5' TAGATACTCAGGATGCAGATTA 3'<br>:::: :<br>miRNA 3' ATCTG-GAGTCCTACGTCTAAT 5' | 1.5   | 239-260 | F-box kelch-repeat protein at3g27150-like |
| vvi-miR2111-5p | VIT_214s0068g02150.5 | target 5' TAGATACTCAGGATGCAGATTA 3'<br>:::: :<br>miRNA 3' ATCTG-GAGTCCTACGTCTAAT 5' | 1.5   | 239-260 | F-box kelch-repeat protein at3g27150-like |
| vvi-miR2950-5p | VIT_209s0002g01600.1 | target 5' CAACTTTGCAAGAGATGGAAT 3'<br>: : :<br>miRNA 3' GGTCACACGTTCTCTACCTTA 5'    | 3     | 234-254 | Dna binding                               |
| vvi-miR319b-3p | VIT_210s0003g00870.1 | target 5' GGGAAC-CCCTTCAGTCCAC 3'<br>: : :<br>miRNA 3' CCCTCGAGGGAAGTCAGGTT 5'      | 3     | 926-944 | Transcription factor tcp4-like            |
| vvi-miR319b-3p | VIT_213s0067g01630.1 | target 5' TGGAGCTCCCTTCACTCCAA 3'<br>: : : :<br>miRNA 3' CCCTCGAGGGAAGTCAGGTT 5'    | 3     | 956-975 | Transcription factor gamyb-like           |
| vvi-miR319c-3p | VIT_210s0003g00870.1 | target 5' GGGAAC-CCCTTCAGTCCAC 3'<br>: : :<br>miRNA 3' CCCTCGAGGGAAGTCAGGTT 5'      | 3     | 926-944 | Transcription factor tcp4-like            |
| vvi-miR319c-3p | VIT_213s0067g01630.1 | target 5' TGGAGCTCCCTTCACTCCAA 3'<br>: : : :<br>miRNA 3' CCCTCGAGGGAAGTCAGGTT 5'    | 3     | 956-975 | Transcription factor gamyb-like           |
| vvi-miR319c-5p | VIT_214s0081g00480.1 | target 5' GAATGCACTGAAGAAAGCTCA 3'<br>: : :<br>miRNA 3' CTCACCTGACTTCTTTTCGAGA 5'   | 3     | 322-342 | Protein                                   |
| vvi-miR319f-3p | VIT_210s0003g00870.1 | target 5' GGGAAC-CCCTTCAGTCCAC 3'<br>: : :<br>miRNA 3' CCCTCGAGGGAAGTCAGGTT 5'      | 3     | 926-944 | Transcription factor tcp4-like            |
| vvi-miR319f-3p | VIT_213s0067g01630.1 | target 5' TGGAGCTCCCTTCACTCCAA 3'<br>: : : :<br>miRNA 3' CCCTCGAGGGAAGTCAGGTT 5'    | 3     | 956-975 | Transcription factor gamyb-like           |
| vvi-miR319g    | VIT_210s0003g00870.1 | target 5' GGGAAC-CCCTTCAGTCCAC 3'<br>: : :<br>miRNA 3' CCCTCGAGGGAAGTCAGGTT 5'      | 3     | 926-944 | Transcription factor tcp4-like            |

| miRNA           | Target id            | Alignment                                                                                                | Score | Range   | Target gene functional annotation                    |
|-----------------|----------------------|----------------------------------------------------------------------------------------------------------|-------|---------|------------------------------------------------------|
| vvi-miR319g     | VIT_213s0067g01630.1 | target 5' TGGAGCTCCCTTCACTCCAA 3'<br>:                  :      :<br>miRNA 3' CCCTCGAGGGAAGTCAGTT 5'      | 3     | 956-975 | Transcription factor gamyb-like                      |
| vvi-miR3623-5p  | VIT_218s0041g02180.2 | target 5' TGGTGCTTGGAGGAGCTTGTGA 3'<br>:                  :      :<br>miRNA 3' ACCACGAACCTACTTGAACACT 5' | 3     | 115-136 | Protein da1-related 1-like                           |
| vvi-miR3623-5p  | VIT_218s0041g02180.3 | target 5' TGGTGCTTGGAGGAGCTTGTGA 3'<br>:                  :      :<br>miRNA 3' ACCACGAACCTACTTGAACACT 5' | 3     | 271-292 | Protein da1-related 1-like                           |
| vvi-miR3624-3p  | VIT_200s0194g00300.1 | target 5' AGTAGTATGCTGCTGCCCTGA 3'<br>:                  :      :<br>miRNA 3' TCATCATAACGACGACGGGACT 5'  | 0     | 141-161 | Uncharacterized protein loc100260893                 |
| vvi-miR3624-3p  | VIT_200s0194g00340.1 | target 5' AGTAGTATGCTGCTGCCCTGA 3'<br>:                  :      :<br>miRNA 3' TCATCATAACGACGACGGGACT 5'  | 0     | 29-Sep  | Uncharacterized protein loc100852467                 |
| vvi-miR3624-3p  | VIT_200s0194g00340.2 | target 5' AGTAGTATGCTGCTGCCCTGA 3'<br>:                  :      :<br>miRNA 3' TCATCATAACGACGACGGGACT 5'  | 0     | 123-143 | Metal ion binding protein                            |
| vvi-miR3629a-5p | VIT_208s0040g01510.1 | target 5' TTTGGTTGCTGAGAAAAT-CG 3'<br>.:                  .:<br>miRNA 3' GAACCGACGACTCTTTTACGC 5'        | 3     | 48-67   | Uncharacterized protein loc100853283                 |
| vvi-miR3629a-5p | VIT_212s0028g01350.1 | target 5' ATTGG-TGCTGAGAAAATGCT 3'<br>:      :                  :<br>miRNA 3' GAACCGACGACTCTTTTACGC 5'   | 3     | 834-853 | Lrr receptor-like serine threonine-protein kinase    |
| vvi-miR3629a-5p | VIT_212s0028g01350.2 | target 5' ATTGG-TGCTGAGAAAATGCT 3'<br>:      :                  :<br>miRNA 3' GAACCGACGACTCTTTTACGC 5'   | 3     | 834-853 | Lrr receptor-like serine threonine-protein kinase    |
| vvi-miR3629a-5p | VIT_212s0028g01350.3 | target 5' ATTGG-TGCTGAGAAAATGCT 3'<br>:      :                  :<br>miRNA 3' GAACCGACGACTCTTTTACGC 5'   | 3     | 447-466 | Lrr receptor-like serine threonine-protein kinase    |
| vvi-miR3629a-5p | VIT_212s0028g01350.4 | target 5' ATTGG-TGCTGAGAAAATGCT 3'<br>:      :                  :<br>miRNA 3' GAACCGACGACTCTTTTACGC 5'   | 3     | 621-640 | Lrr receptor-like serine threonine-protein kinase    |
| vvi-miR3629a-5p | VIT_212s0028g01350.5 | target 5' ATTGG-TGCTGAGAAAATGCT 3'<br>:      :                  :<br>miRNA 3' GAACCGACGACTCTTTTACGC 5'   | 3     | 834-853 | Lrr receptor-like serine threonine-protein kinase    |
| vvi-miR3632-3p  | VIT_213s0067g00790.1 | target 5' ATGGTATGGGGGGTCTGGGAAA 3'<br>:                  :      :<br>miRNA 3' AACCATAACCCCGACACCCTTT 5' | 2     | 575-596 | Disease resistance protein                           |
| vvi-miR3632-3p  | VIT_213s0067g00830.1 | target 5' ATGGTATGGGGGGTCTGGGAAA 3'<br>:                  :      :<br>miRNA 3' AACCATAACCCCGACACCCTTT 5' | 2     | 578-599 | Probable disease resistance rpp8-like protein 2-like |

| <b>miRNA</b>    | <b>Target id</b>     | <b>Alignment</b>                                                                                                       | <b>Score</b> | <b>Range</b> | <b>Target gene functional annotation</b>             |
|-----------------|----------------------|------------------------------------------------------------------------------------------------------------------------|--------------|--------------|------------------------------------------------------|
| vvi-miR3632-3p  | VIT_213s0067g00830.2 | target 5' ATGGTATGGGGGGTCTGGGAAA 3'<br>: : : : : : : : : : : : : : : : : : : :<br>miRNA 3' AACCATACACCCAGACCTTT 5'     | 2            | 578-599      | Probable disease resistance rpp8-like protein 2-like |
| vvi-miR3632-3p  | VIT_213s0067g00830.3 | target 5' ATGGTATGGGGGGTCTGGGAAA 3'<br>: : : : : : : : : : : : : : : : : : : :<br>miRNA 3' AACCATACACCCAGACCTTT 5'     | 2            | 578-599      | Probable disease resistance rpp8-like protein 2-like |
| vvi-miR3632-3p  | VIT_213s0067g00830.4 | target 5' ATGGTATGGGGGGTCTGGGAAA 3'<br>: : : : ~ : : : : : : : : : : : : : :<br>miRNA 3' AACCATACACCCAGACCTTT 5'       | 2            | 578-599      | Probable disease resistance rpp8-like protein 2-like |
| vvi-miR3633b-5p | VIT_203s0180g00280.1 | target 5' GGAT-CCAGCCATCCATTCT 3'<br>. : : : : : : : : : : : : : : : : : : :<br>miRNA 3' TCTAGGGTCGGTGGGTAAGG 5'       | 3            | 431-449      | Limonoid udp-glucosyltransferase                     |
| vvi-miR3633b-5p | VIT_210s0003g03540.1 | target 5' AGATTTTCAGCCACCCATTAC 3'<br>: : : : : : : : : : : : : : : : : : : :<br>miRNA 3' TCTAGGGTCGGTGGGTAAGG 5'      | 3            | 633-652      | Beta-amyrin synthase                                 |
| vvi-miR3633b-5p | VIT_212s0034g02470.1 | target 5' AGATCCCA-CCATCCATTCC 3'<br>: : : : : : : : : : : : : : : : : : : :<br>miRNA 3' TCTAGGGTCGGTGGGTAAGG 5'       | 3            | 1081-1099    | Disease resistance protein at3g14460-like            |
| vvi-miR3634-3p  | VIT_219s0085g00430.1 | target 5' ATGGCATGAGTG-GAGTCGGAAA 3'<br>: : : : : : : : : : : : : : : : : : : :<br>miRNA 3' TGCCGTACTCACGCTCAGCCTTT 5' | 2.5          | 86-107       | Uncharacterized protein loc100855287                 |
| vvi-miR3634-3p  | VIT_219s0085g00470.1 | target 5' ATGGCATGAGTG-GAGTCGGAAA 3'<br>: : : : ~ : : : : : : : : : : : : : :<br>miRNA 3' TGCCGTACTCACGCTCAGCCTTT 5'   | 2.5          | 116-137      | Uncharacterized protein loc100854011                 |
| vvi-miR3635-3p  | VIT_217s0000g05850.1 | target 5' GAGGCATGTGTGGGACATAAT 3'<br>: : : : ~ : : : : : : : : : : : : : :<br>miRNA 3' CTCCGTACACACCTGTATTA 5'        | 0            | 2097-2117    | Abc transporter retinal flippase subfamily           |
| vvi-miR3635-3p  | VIT_217s0000g05850.2 | target 5' GAGGCATGTGTGGGACATAAT 3'<br>: : : : ~ : : : : : : : : : : : : : :<br>miRNA 3' CTCCGTACACACCTGTATTA 5'        | 0            | 2097-2117    | Abc transporter retinal flippase subfamily           |
| vvi-miR3635-3p  | VIT_217s0000g05850.3 | target 5' GAGGCATGTGTGGGACATAAT 3'<br>: : : : ~ : : : : : : : : : : : : : :<br>miRNA 3' CTCCGTACACACCTGTATTA 5'        | 0            | 2175-2195    | Abc transporter retinal flippase subfamily           |
| vvi-miR3635-3p  | VIT_217s0000g05850.4 | target 5' GAGGCATGTGTGGGACATAAT 3'<br>: : : : ~ : : : : ~ : : : : ~ : : : :<br>miRNA 3' CTCCGTACACACCTGTATTA 5'        | 0            | 2175-2195    | Abc transporter retinal flippase subfamily           |
| vvi-miR3635-3p  | VIT_217s0000g05850.5 | target 5' GAGGCATGTGTGGGACATAAT 3'<br>: : : : ~ : : : : ~ : : : : ~ : : : :<br>miRNA 3' CTCCGTACACACCTGTATTA 5'        | 0            | 2175-2195    | Abc transporter retinal flippase subfamily           |
| vvi-miR3635-5p  | VIT_219s0015g00010.1 | target 5' CCGCTATGCCCCACACATGCC 3'<br>: . : : : : : : : : : : : : : : : : : : :<br>miRNA 3' GATAATACGGGTGTGTACGG 5'    | 2.5          | 3417-3437    | Abc transporter c family member 3-like               |





| miRNA          | Target id            | Alignment                                                                                             | Score | Range     | Target gene functional annotation                           |
|----------------|----------------------|-------------------------------------------------------------------------------------------------------|-------|-----------|-------------------------------------------------------------|
| vvi-miR393b    | VIT_214s0030g01240.1 | target 5' GA-CAATGCGATCCCTTTGGA 3'<br>:: ::::::::::::::::::::<br>miRNA 3' CTAGTTACGCTAGGGAAACCT 5'    | 1     | 1506-1525 | Transport inhibitor response 1                              |
| vvi-miR393b    | VIT_214s0030g01240.2 | target 5' GA-CAATGCGATCCCTTTGGA 3'<br>:: ::::::::::::::::::::<br>miRNA 3' CTAGTTACGCTAGGGAAACCT 5'    | 1     | 1506-1525 | Transport inhibitor response 1                              |
| vvi-miR393b    | VIT_214s0030g01240.3 | target 5' GA-CAATGCGATCCCTTTGGA 3'<br>:: ::::::::::::::::::::<br>miRNA 3' CTAGTTACGCTAGGGAAACCT 5'    | 1     | 1506-1525 | Transport inhibitor response 1                              |
| vvi-miR393b    | VIT_214s0030g01240.4 | target 5' GA-CAATGCGATCCCTTTGGA 3'<br>:: ::::::::::::::::::::<br>miRNA 3' CTAGTTACGCTAGGGAAACCT 5'    | 1     | 1506-1525 | Transport inhibitor response 1                              |
| vvi-miR393b    | VIT_214s0068g01330.1 | target 5' GA-CAATGCGATCCCTTTGGA 3'<br>:: ::::::::::::::::::::<br>miRNA 3' CTAGTTACGCTAGGGAAACCT 5'    | 1     | 1503-1522 | F-box family protein                                        |
| vvi-miR394c    | VIT_201s0010g03730.1 | target 5' GGAGGTTGACAGAATGCCAA 3'<br>::::: ::::::::::::::::::::<br>miRNA 3' CCTCCACCTGTCTTACGGTT 5'   | 1     | 939-958   | F-box family protein                                        |
| vvi-miR394c    | VIT_201s0010g03730.2 | target 5' GGAGGTTGACAGAATGCCAA 3'<br>::::: ::::::::::::::::::::<br>miRNA 3' CCTCCACCTGTCTTACGGTT 5'   | 1     | 1131-1150 | F-box family protein                                        |
| vvi-miR395a    | VIT_207s0031g00940.1 | target 5' AAGTTCTCCCAAACACTTCAA 3'<br>::::: ::::::::::::::::::::<br>miRNA 3' CTCAAGGGGGTTTGTGAAGTC 5' | 2.5   | 37-57     | Sulfate bicarbonate oxalate exchanger and transporter sat-1 |
| vvi-miR395a    | VIT_207s0031g00940.2 | target 5' AAGTTCTCCCAAACACTTCAA 3'<br>::::: ::::::::::::::::::::<br>miRNA 3' CTCAAGGGGGTTTGTGAAGTC 5' | 2.5   | 37-57     | Sulfate bicarbonate oxalate exchanger and transporter sat-1 |
| vvi-miR395c-3p | VIT_207s0031g00940.1 | target 5' AAGTTCTCCCAAACACTTCAA 3'<br>::::: ::::::::::::::::::::<br>miRNA 3' CTCAAGGGGGTTTGTGAAGTC 5' | 2.5   | 37-57     | Sulfate bicarbonate oxalate exchanger and transporter sat-1 |
| vvi-miR395c-3p | VIT_207s0031g00940.2 | target 5' AAGTTCTCCCAAACACTTCAA 3'<br>::::: ::::::::::::::::::::<br>miRNA 3' CTCAAGGGGGTTTGTGAAGTC 5' | 2.5   | 37-57     | Sulfate bicarbonate oxalate exchanger and transporter sat-1 |
| vvi-miR395c-5p | VIT_214s0066g00910.1 | target 5' TGGTGAAGTGTTCAAGGGAAC 3'<br>.: ::::::::::::::::::::<br>miRNA 3' GTCACCTTACCAGTTCCCTTG 5'    | 3     | 1101-1121 | Protein                                                     |
| vvi-miR395d    | VIT_207s0031g00940.1 | target 5' AAGTTCTCCCAAACACTTCAA 3'<br>::::: ::::::::::::::::::::<br>miRNA 3' CTCAAGGGGGTTTGTGAAGTC 5' | 2.5   | 37-57     | Sulfate bicarbonate oxalate exchanger and transporter sat-1 |
| vvi-miR395d    | VIT_207s0031g00940.2 | target 5' AAGTTCTCCCAAACACTTCAA 3'<br>::::: ::::::::::::::::::::<br>miRNA 3' CTCAAGGGGGTTTGTGAAGTC 5' | 2.5   | 37-57     | Sulfate bicarbonate oxalate exchanger and transporter sat-1 |





| miRNA          | Target id            | Alignment                                                                                            | Score | Range     | Target gene functional annotation           |
|----------------|----------------------|------------------------------------------------------------------------------------------------------|-------|-----------|---------------------------------------------|
| vvi-miR396a-5p | VIT_207s0191g00220.2 | target 5' AACTCAAGGAAGCTGTGGAA 3'<br>: ::::::::::::::::::::<br>miRNA 3' TCAAGTTCTTTTCGACACCTT 5'     | 3     | 494-513   | Uncharacterized protein loc100251922        |
| vvi-miR396a-5p | VIT_208s0007g03760.1 | target 5' CGTTCAAGAAAGCCTGTGGAA 3'<br>: ::::::::::::::::::::<br>miRNA 3' TCAAGTTCTTTC-GACACCTT 5'    | 3     | 538-558   | Growth-regulating factor 4                  |
| vvi-miR396a-5p | VIT_209s0002g01350.1 | target 5' CGTTCAAGAAAGCCTGTGGAA 3'<br>: ::::::::::::::::::::<br>miRNA 3' TCAAGTTCTTTC-GACACCTT 5'    | 3     | 334-354   | Growth-regulating factor 5                  |
| vvi-miR396a-5p | VIT_210s0597g00040.1 | target 5' AGATGGAGAAAGCTGTGGAG 3'<br>: : . ::::::::::::::::::::<br>miRNA 3' TCAAGTTCTTTTCGACACCTT 5' | 3     | 1202-1221 | Pentatricopeptide repeat-containing protein |
| vvi-miR396a-5p | VIT_211s0016g01250.1 | target 5' CGTTCAAGAAAGCCTGTGGAA 3'<br>: ::::::::::::::::::::<br>miRNA 3' TCAAGTTCTTTC-GACACCTT 5'    | 3     | 343-363   | Growth-regulating factor 5                  |
| vvi-miR396a-5p | VIT_215s0048g01740.1 | target 5' CGTTCAAGAAAGCCTGTGGAA 3'<br>: ::::::::::::::::::::<br>miRNA 3' TCAAGTTCTTTC-GACACCTT 5'    | 3     | 439-459   | Growth-regulating factor                    |
| vvi-miR396a-5p | VIT_215s0048g01740.2 | target 5' CGTTCAAGAAAGCCTGTGGAA 3'<br>: ::::::::::::::::::::<br>miRNA 3' TCAAGTTCTTTC-GACACCTT 5'    | 3     | 460-480   | Growth-regulating factor                    |
| vvi-miR396a-5p | VIT_215s0048g01740.4 | target 5' CGTTCAAGAAAGCCTGTGGAA 3'<br>: ::::::::::::::::::::<br>miRNA 3' TCAAGTTCTTTC-GACACCTT 5'    | 3     | 115-135   | Growth-regulating factor                    |
| vvi-miR396a-5p | VIT_215s0048g01740.5 | target 5' CGTTCAAGAAAGCCTGTGGAA 3'<br>: ::::::::::::::::::::<br>miRNA 3' TCAAGTTCTTTC-GACACCTT 5'    | 3     | 115-135   | Growth-regulating factor                    |
| vvi-miR396a-5p | VIT_215s0048g01740.7 | target 5' CGTTCAAGAAAGCCTGTGGAA 3'<br>: ::::::::::::::::::::<br>miRNA 3' TCAAGTTCTTTC-GACACCTT 5'    | 3     | 115-135   | Growth-regulating factor                    |
| vvi-miR396a-5p | VIT_216s0039g01450.1 | target 5' CGTTCAAGAAAGCCTGTGGAA 3'<br>: ::::::::::::::::::::<br>miRNA 3' TCAAGTTCTTTC-GACACCTT 5'    | 3     | 361-381   | Growth-regulating factor 1                  |
| vvi-miR396a-5p | VIT_216s0039g01450.2 | target 5' CGTTCAAGAAAGCCTGTGGAA 3'<br>: ::::::::::::::::::::<br>miRNA 3' TCAAGTTCTTTC-GACACCTT 5'    | 3     | 361-381   | Growth-regulating factor 1                  |
| vvi-miR396a-5p | VIT_216s0039g01450.3 | target 5' CGTTCAAGAAAGCCTGTGGAA 3'<br>: ::::::::::::::::::::<br>miRNA 3' TCAAGTTCTTTC-GACACCTT 5'    | 3     | 361-381   | Growth-regulating factor 1                  |
| vvi-miR396a-5p | VIT_216s0039g01450.4 | target 5' CGTTCAAGAAAGCCTGTGGAA 3'<br>: ::::::::::::::::::::<br>miRNA 3' TCAAGTTCTTTC-GACACCTT 5'    | 3     | 172-192   | Growth-regulating factor 1                  |





| miRNA          | Target id            |        | Alignment                                               | Score | Range   | Target gene functional annotation       |
|----------------|----------------------|--------|---------------------------------------------------------|-------|---------|-----------------------------------------|
| vvi-miR397a-3p | VIT_204s0008g06470.1 | target | 5' CAT-ATTGAGTGCAGTGCCAT 3'<br>::: :::::::::::::::::::: | 3     | 541-560 | CysteinyI-trna synthetase               |
|                |                      | miRNA  | 3' GTACTAACTCACGTGCGGTT 5'                              |       |         |                                         |
| vvi-miR397a-3p | VIT_204s0008g06470.2 | target | 5' CAT-ATTGAGTGCAGTGCCAT 3'<br>::: :::::::::::::::::::: | 3     | 832-851 | CysteinyI-trna synthetase               |
|                |                      | miRNA  | 3' GTACTAACTCACGTGCGGTT 5'                              |       |         |                                         |
| vvi-miR397a-3p | VIT_204s0008g06470.3 | target | 5' CAT-ATTGAGTGCAGTGCCAT 3'<br>::: :::::::::::::::::::: | 3     | 373-392 | CysteinyI-trna synthetase               |
|                |                      | miRNA  | 3' GTACTAACTCACGTGCGGTT 5'                              |       |         |                                         |
| vvi-miR397a-5p | VIT_204s0069g00950.1 | target | 5' TGTC AATGCTGCACTCAATGA 3'<br>. . . . .               | 1.5   | 243-263 | Laccase (diphenol oxidase)-like protein |
|                |                      | miRNA  | 3' GTAGTTGCGACGTGAGTTACT 5'                             |       |         |                                         |
| vvi-miR397a-5p | VIT_204s0069g00950.2 | target | 5' TGTC AATGCTGCACTCAATGA 3'<br>. . . . .               | 1.5   | 243-263 | Laccase (diphenol oxidase)-like protein |
|                |                      | miRNA  | 3' GTAGTTGCGACGTGAGTTACT 5'                             |       |         |                                         |
| vvi-miR397a-5p | VIT_206s0004g03760.1 | target | 5' CATCAATGCGGCACTCAATGA 3'<br>. . . . .                | 2.5   | 705-725 | Protein                                 |
|                |                      | miRNA  | 3' GTAGTTGCGACGTGAGTTACT 5'                             |       |         |                                         |
| vvi-miR397a-5p | VIT_206s0004g03760.2 | target | 5' CATCAATGCGGCACTCAATGA 3'<br>. . . . .                | 2.5   | 705-725 | Protein                                 |
|                |                      | miRNA  | 3' GTAGTTGCGACGTGAGTTACT 5'                             |       |         |                                         |
| vvi-miR397a-5p | VIT_206s0004g06090.1 | target | 5' CATCAACGCTGCGCTGAATGA 3'<br>. . . . .                | 3     | 663-683 | Laccase 1a                              |
|                |                      | miRNA  | 3' GTAGTTGCGACGTGAGTTACT 5'                             |       |         |                                         |
| vvi-miR397a-5p | VIT_208s0007g00600.1 | target | 5' GATCAACGCTGCACTCAACGA 3'<br>. . . . .                | 3     | 693-713 | Laccase 110b                            |
|                |                      | miRNA  | 3' GTAGTTGCGACGTGAGTTACT 5'                             |       |         |                                         |
| vvi-miR397a-5p | VIT_208s0007g00600.2 | target | 5' GATCAACGCTGCACTCAACGA 3'<br>. . . . .                | 3     | 192-212 | Laccase 110b                            |
|                |                      | miRNA  | 3' GTAGTTGCGACGTGAGTTACT 5'                             |       |         |                                         |
| vvi-miR397a-5p | VIT_208s0007g00670.1 | target | 5' AATCAATGCTGCACTCAATGA 3'<br>. . . . .                | 1.5   | 687-707 | Laccase 110c                            |
|                |                      | miRNA  | 3' GTAGTTGCGACGTGAGTTACT 5'                             |       |         |                                         |
| vvi-miR397a-5p | VIT_208s0007g01910.1 | target | 5' CATTAAACGCTGCACTCAATGA 3'<br>. . . . .               | 0.5   | 666-686 | Laccase 1a                              |
|                |                      | miRNA  | 3' GTAGTTGCGACGTGAGTTACT 5'                             |       |         |                                         |
| vvi-miR397a-5p | VIT_208s0007g01910.2 | target | 5' CATTAAACGCTGCACTCAATGA 3'<br>. . . . .               | 0.5   | 666-686 | Laccase 1a                              |
|                |                      | miRNA  | 3' GTAGTTGCGACGTGAGTTACT 5'                             |       |         |                                         |
| vvi-miR397a-5p | VIT_208s0040g01790.1 | target | 5' CGTCAATGCTGCACTCAATGA 3'<br>. . . . .                | 1     | 684-704 | Laccase (diphenol oxidase)-like protein |
|                |                      | miRNA  | 3' GTAGTTGCGACGTGAGTTACT 5'                             |       |         |                                         |







| miRNA          | Target id            | Alignment                                                                                       | Score | Range   | Target gene functional annotation        |
|----------------|----------------------|-------------------------------------------------------------------------------------------------|-------|---------|------------------------------------------|
| vvi-miR535a-3p | VIT_207s0104g00030.1 | target 5' CTTGACAACGAGAGAGAGCAC 3'<br>::::: ::::::::::::::<br>miRNA 3' ATACTGTCGCTCTCTCTCGTG 5' | 3     | 72-92   | Unnamed protein product [Vitis vinifera] |
| vvi-miR535a-5p | VIT_200s0358g00010.1 | target 5' GCGTGCTCTCTCTCGCTGTCA 3'<br>::::: ::::::::::::::<br>miRNA 3' CGCACGAGAGAGAGCAACAGT 5' | 2     | 132-152 | Unnamed protein product [Vitis vinifera] |
| vvi-miR535b-3p | VIT_200s0358g00010.1 | target 5' CTTGACAACGAGAGAGAGCAC 3'<br>::::: ::::::::::::::<br>miRNA 3' ATACTGTCGCTCTCTCTCGTG 5' | 3     | 72-92   | Unnamed protein product [Vitis vinifera] |
| vvi-miR535b-3p | VIT_207s0104g00030.1 | target 5' CTTGACAACGAGAGAGAGCAC 3'<br>::::: ::::::::::::::<br>miRNA 3' ATACTGTCGCTCTCTCTCGTG 5' | 3     | 72-92   | Unnamed protein product [Vitis vinifera] |
| vvi-miR535b-5p | VIT_200s0358g00010.1 | target 5' GCGTGCTCTCTCTCGCTGTCA 3'<br>::::: ::::::::::::::<br>miRNA 3' CGCACGAGAGAGAGCAACAGT 5' | 2     | 132-152 | Unnamed protein product [Vitis vinifera] |
| vvi-miR535c-5p | VIT_200s0358g00010.1 | target 5' GCGTGCTCTCTCTCGCTGTCA 3'<br>::::: ::::::::::::::<br>miRNA 3' CGCACGAGAGAGAGCAACAGT 5' | 2     | 132-152 | Unnamed protein product [Vitis vinifera] |
| vvi-miRC159d   | VIT_201s0127g00480.1 | target 5' AGAGCTACCTTCAAACCAAA 3'<br>::::: ::::::::::::::<br>miRNA 3' TCTCGAGGGAAG-TTTGGTTT 5'  | 3     | 261-281 | Uncharacterized protein                  |
| vvi-miRC159d   | VIT_201s0127g00480.2 | target 5' AGAGCTACCTTCAAACCAAA 3'<br>::::: ::::::::::::::<br>miRNA 3' TCTCGAGGGAAG-TTTGGTTT 5'  | 3     | 261-281 | Uncharacterized protein                  |
| vvi-miRC159d   | VIT_201s0127g00480.3 | target 5' AGAGCTACCTTCAAACCAAA 3'<br>::::: ::::::::::::::<br>miRNA 3' TCTCGAGGGAAG-TTTGGTTT 5'  | 3     | 261-281 | Uncharacterized protein                  |
| vvi-miRC159d   | VIT_210s0003g00840.1 | target 5' AACGCACCCTTCAAACCAAA 3'<br>: : ::::::::::::::<br>miRNA 3' TCTCGAGGGAAGTTTGGTTT 5'     | 3     | 588-607 | Unnamed protein product [Vitis vinifera] |
| vvi-miRC159d   | VIT_219s0014g01700.1 | target 5' AGAGCCCCCTTCAAACCAAA 3'<br>::::: ::::::::::::::<br>miRNA 3' TCTCGAGGGAAGTTTGGTTT 5'   | 1     | 660-679 | Uncharacterized protein loc100505457     |
| vvi-miRC159d   | VIT_219s0090g00590.1 | target 5' AGAGCTCCCTTCAAGCCAAT 3'<br>::::: ::::::::::::::<br>miRNA 3' TCTCGAGGGAAGTTTGGTTT 5'   | 2     | 846-865 | R2r3-myb transcription                   |
| vvi-miRC159e   | VIT_201s0127g00480.1 | target 5' AGAGCTACCTTCAAACCAAA 3'<br>::::: ::::::::::::::<br>miRNA 3' TCTCGAGGGAAG-TTTGGTTT 5'  | 3     | 261-281 | Uncharacterized protein                  |
| vvi-miRC159e   | VIT_201s0127g00480.2 | target 5' AGAGCTACCTTCAAACCAAA 3'<br>::::: ::::::::::::::<br>miRNA 3' TCTCGAGGGAAG-TTTGGTTT 5'  | 3     | 261-281 | Uncharacterized protein                  |







| miRNA           | Target id            | Alignment                                                                                                                    | Score | Range     | Target gene functional annotation                      |
|-----------------|----------------------|------------------------------------------------------------------------------------------------------------------------------|-------|-----------|--------------------------------------------------------|
| vvi-miRC172f-3p | VIT_207s0031g00220.1 | target 5' GCAGCATCATCAGGATTCCCA 3'<br>: : : : : : : : : : : : : : : : : : : : : : : :<br>miRNA 3' CGTCGTAGTAGTTCTAAGAGT 5'   | 3     | 1432-1452 | Transcription factor apetala2                          |
| vvi-miRC172f-3p | VIT_207s0031g00220.2 | target 5' GCAGCATCATCAGGATTCCCA 3'<br>: : : : : : : : : : : : : : : : : : : : : : : :<br>miRNA 3' CGTCGTAGTAGTTCTAAGAGT 5'   | 3     | 1444-1464 | Transcription factor apetala2                          |
| vvi-miRC172f-3p | VIT_208s0040g03180.1 | target 5' GCAGCATCATCAGGATTCTTG 3'<br>: : : : : : : : : : : : : : : : : : : : : : : :<br>miRNA 3' CGTCGTAGTAGTTCTAAGAGT 5'   | 2.5   | 1333-1353 | Ap2 domain-containing transcription factor             |
| vvi-miRC172f-5p | VIT_216s0050g00455.1 | target 5' TATGAAGCTTGATGATGCTAT 3'<br>: : : : : : : : : : : : : : : : : : : : : : : :<br>miRNA 3' AACTTAGAACTACTACGATG 5'    | 2.5   | 249-269   | Rna polymerase iii subunit rpc82 family protein        |
| vvi-miRC2275    | VIT_210s0003g02830.1 | target 5' GGAGAAATTGGAGGAAACTGAA 3'<br>: : : : : : : : : : : : : : : : : : : : : : : :<br>miRNA 3' ACTCTATAACCTCCTTTGATTT 5' | 3     | 531-552   | O-acetyltransferase-like protein                       |
| vvi-miRC2275    | VIT_210s0003g02830.2 | target 5' GGAGAAATTGGAGGAAACTGAA 3'<br>: : : : : : : : : : : : : : : : : : : : : : : :<br>miRNA 3' ACTCTATAACCTCCTTTGATTT 5' | 3     | 531-552   | O-acetyltransferase-like protein                       |
| vvi-miRC2275    | VIT_210s0003g02830.3 | target 5' GGAGAAATTGGAGGAAACTGAA 3'<br>: : : : : : : : : : : : : : : : : : : : : : : :<br>miRNA 3' ACTCTATAACCTCCTTTGATTT 5' | 3     | 399-420   | Cas1 domain-containing protein 1-like                  |
| vvi-miRC3627a   | VIT_209s0018g02130.1 | target 5' GGCGCCATCTCTCGTGCGGCAG 3'<br>: : : : : : : : : : : : : : : : : : : : : : : :<br>miRNA 3' CCACGGTAGAGAGCAGCCGTT 5'  | 1.5   | 149-170   | Calcium-transporting atpase plasma membrane-type-like  |
| vvi-miRC3629e   | VIT_200s0524g00010.1 | target 5' CAGTTTCTCGGCAACCAAACA 3'<br>: : : : : : : : : : : : : : : : : : : : : : : :<br>miRNA 3' GTAAAAGAGCTGTTGGTTTGT 5'   | 2     | 280-300   | Protein                                                |
| vvi-miRC3629e   | VIT_208s0007g00890.1 | target 5' CATGTTCTCG-CAACCAAACA 3'<br>: : : : : : : : : : : : : : : : : : : : : : : :<br>miRNA 3' GTAAAAGAGCTGTTGGTTTGT 5'   | 3     | 86-105    | Tropinone reductase homolog at1g07440                  |
| vvi-miRC3629e   | VIT_215s0048g02420.1 | target 5' AGTTTCTCGGCAACCAAACG 3'<br>: : : : : : : : : : : : : : : : : : : : : : : :<br>miRNA 3' GTAAAAGAGCTGTTGGTTTGT 5'    | 1     | 62-82     | Hypothetical protein                                   |
| vvi-miRC3629e   | VIT_217s0000g07510.3 | target 5' TATTTCTCGGCAACCAAACG 3'<br>: : : : : : : : : : : : : : : : : : : : : : : :<br>miRNA 3' GTAAAAGAGCTGTTGGTTTGT 5'    | 3     | 598-618   | Myb transcription factor                               |
| vvi-miRC390a-5p | VIT_210s0003g01890.1 | target 5' GCGTTCCTCCTCCTGAGCTT 3'<br>: : : : : : : : : : : : : : : : : : : : : : : :<br>miRNA 3' CCGCGATAGGGAGGACTCGAA 5'    | 2.5   | 319-339   | Lrr receptor-like serine threonine-protein kinase rfk1 |
| vvi-miRC390a-5p | VIT_216s0098g01090.1 | target 5' GGCTCTATACCTCCTGAGCTT 3'<br>: : : : : : : : : : : : : : : : : : : : : : : :<br>miRNA 3' CCGCGATAGGGAGGACTCGAA 5'   | 3     | 1621-1641 | Leucine-rich repeat receptor-like protein kinase pep1  |

| miRNA           | Target id            | Alignment |                                                         | Score | Range     | Target gene functional annotation                     |
|-----------------|----------------------|-----------|---------------------------------------------------------|-------|-----------|-------------------------------------------------------|
| vvi-miRC396e-5p | VIT_200s0179g00260.1 | target    | 5' GGGGTCAAGAGAGCCGTGGAA 3'<br>... :::::::::::::::::::: | 3     | 1978-1998 | Calcium-transporting atpase plasma membrane-type-like |
|                 |                      | miRNA     | 3' TTCAAGTTCTTTTCGGCACCTT 5'                            |       |           |                                                       |
| vvi-miRC477c-3p | VIT_217s0000g02070.1 | target    | 5' GGT-CTCCACCGGCTTCCAAG 3'<br>::: :::::::::::::::::::: | 2.5   | 135-154   | Deoxyhypusine synthase                                |
|                 |                      | miRNA     | 3' CCAGGGGGTGGCCGAAGGTTG 5'                             |       |           |                                                       |
| vvi-miRC477c-3p | VIT_217s0000g02070.2 | target    | 5' GGT-CTCCACCGGCTTCCAAG 3'<br>::: :::::::::::::::::::: | 2.5   | 135-154   | Deoxyhypusine synthase                                |
|                 |                      | miRNA     | 3' CCAGGGGGTGGCCGAAGGTTG 5'                             |       |           |                                                       |
| vvi-miRC477c-3p | VIT_217s0000g02070.3 | target    | 5' GGT-CTCCACCGGCTTCCAAG 3'<br>::: :::::::::::::::::::: | 2.5   | 135-154   | Deoxyhypusine synthase                                |
|                 |                      | miRNA     | 3' CCAGGGGGTGGCCGAAGGTTG 5'                             |       |           |                                                       |
| vvi-miRC477c-5p | VIT_201s0010g02270.1 | target    | 5' ATATTGGAAGCCTTTGAGGGA 3'<br>: ::::::::::::::::::::   | 1     | 778-798   | Gras family transcription factor                      |
|                 |                      | miRNA     | 3' TTAAACCTTCGGAAACTCCCT 5'                             |       |           |                                                       |
| vvi-miRC477c-5p | VIT_217s0000g10300.1 | target    | 5' ATATTGGAAGCCTTTGAGGGA 3'<br>: ::::::::::::::::::::   | 1     | 748-768   | Gras family transcription factor                      |
|                 |                      | miRNA     | 3' TTAAACCTTCGGAAACTCCCT 5'                             |       |           |                                                       |
| vvi-miRC477d-3p | VIT_217s0000g02070.1 | target    | 5' GGT-CTCCACCGGCTTCCAAG 3'<br>::: :::::::::::::::::::: | 2.5   | 135-154   | Deoxyhypusine synthase                                |
|                 |                      | miRNA     | 3' CCAGGGGGTGGCCGAAGGTTG 5'                             |       |           |                                                       |
| vvi-miRC477d-3p | VIT_217s0000g02070.2 | target    | 5' GGT-CTCCACCGGCTTCCAAG 3'<br>::: :::::::::::::::::::: | 2.5   | 135-154   | Deoxyhypusine synthase                                |
|                 |                      | miRNA     | 3' CCAGGGGGTGGCCGAAGGTTG 5'                             |       |           |                                                       |
| vvi-miRC477d-3p | VIT_217s0000g02070.3 | target    | 5' GGT-CTCCACCGGCTTCCAAG 3'<br>::: :::::::::::::::::::: | 2.5   | 135-154   | Deoxyhypusine synthase                                |
|                 |                      | miRNA     | 3' CCAGGGGGTGGCCGAAGGTTG 5'                             |       |           |                                                       |
| vvi-miRC477d-5p | VIT_201s0010g02270.1 | target    | 5' ATATTGGAAGCCTTTGAGGGA 3'<br>: ::::::::::::::::::::   | 1     | 778-798   | Gras family transcription factor                      |
|                 |                      | miRNA     | 3' TTAAACCTTCGGAAACTCCCT 5'                             |       |           |                                                       |
| vvi-miRC477d-5p | VIT_217s0000g10300.1 | target    | 5' ATATTGGAAGCCTTTGAGGGA 3'<br>: ::::::::::::::::::::   | 1     | 748-768   | Gras family transcription factor                      |
|                 |                      | miRNA     | 3' TTAAACCTTCGGAAACTCCCT 5'                             |       |           |                                                       |
| vvi-miRC477e-3p | VIT_217s0000g02070.1 | target    | 5' GGT-CTCCACCGGCTTCCAAG 3'<br>::: :::::::::::::::::::: | 2.5   | 135-154   | Deoxyhypusine synthase                                |
|                 |                      | miRNA     | 3' CCAGGGGGTGGCCGAAGGTTG 5'                             |       |           |                                                       |
| vvi-miRC477e-3p | VIT_217s0000g02070.2 | target    | 5' GGT-CTCCACCGGCTTCCAAG 3'<br>::: :::::::::::::::::::: | 2.5   | 135-154   | Deoxyhypusine synthase                                |
|                 |                      | miRNA     | 3' CCAGGGGGTGGCCGAAGGTTG 5'                             |       |           |                                                       |
| vvi-miRC477e-3p | VIT_217s0000g02070.3 | target    | 5' GGT-CTCCACCGGCTTCCAAG 3'<br>::: :::::::::::::::::::: | 2.5   | 135-154   | Deoxyhypusine synthase                                |
|                 |                      | miRNA     | 3' CCAGGGGGTGGCCGAAGGTTG 5'                             |       |           |                                                       |

| miRNA           | Target id            | Alignment                                                                                         | Score | Range   | Target gene functional annotation |
|-----------------|----------------------|---------------------------------------------------------------------------------------------------|-------|---------|-----------------------------------|
| vvi-miRC477e-5p | VIT_201s0010g02270.1 | target 5' ATATTGGAAGCCTTTGAGGGA 3'<br>: ::::::::::::::::::::<br>miRNA 3' TTAAACCTTCGGAAACTCCCT 5' | 1     | 778-798 | Gras family transcription factor  |
| vvi-miRC477e-5p | VIT_217s0000g10300.1 | target 5' ATATTGGAAGCCTTTGAGGGA 3'<br>: ::::::::::::::::::::<br>miRNA 3' TTAAACCTTCGGAAACTCCCT 5' | 1     | 748-768 | Gras family transcription factor  |
| vvi-miRC477f-5p | VIT_201s0010g02270.1 | target 5' ATATTGGAAGCCTTTGAGGGA 3'<br>: ::::::::::::::::::::<br>miRNA 3' TTAAACCTTCGGAAACTCCCT 5' | 1     | 778-798 | Gras family transcription factor  |
| vvi-miRC477f-5p | VIT_217s0000g10300.1 | target 5' ATATTGGAAGCCTTTGAGGGA 3'<br>: ::::::::::::::::::::<br>miRNA 3' TTAAACCTTCGGAAACTCCCT 5' | 1     | 748-768 | Gras family transcription factor  |
| vvi-miRC477g-3p | VIT_217s0000g02070.1 | target 5' GGT-CTCCACCGCTTCCAAG 3'<br>::: ::::::::::::::::::::<br>miRNA 3' CCAGGGGTGGCCGAAGGTTG 5' | 2.5   | 135-154 | Deoxyhypusine synthase            |
| vvi-miRC477g-3p | VIT_217s0000g02070.2 | target 5' GGT-CTCCACCGCTTCCAAG 3'<br>::: ::::::::::::::::::::<br>miRNA 3' CCAGGGGTGGCCGAAGGTTG 5' | 2.5   | 135-154 | Deoxyhypusine synthase            |
| vvi-miRC477g-3p | VIT_217s0000g02070.3 | target 5' GGT-CTCCACCGCTTCCAAG 3'<br>::: ::::::::::::::::::::<br>miRNA 3' CCAGGGGTGGCCGAAGGTTG 5' | 2.5   | 135-154 | Deoxyhypusine synthase            |
| vvi-miRC477g-5p | VIT_201s0010g02270.1 | target 5' ATATTGGAAGCCTTTGAGGGA 3'<br>: ::::::::::::::::::::<br>miRNA 3' TTAAACCTTCGGAAACTCCCT 5' | 1     | 778-798 | Gras family transcription factor  |
| vvi-miRC477g-5p | VIT_217s0000g10300.1 | target 5' ATATTGGAAGCCTTTGAGGGA 3'<br>: ::::::::::::::::::::<br>miRNA 3' TTAAACCTTCGGAAACTCCCT 5' | 1     | 748-768 | Gras family transcription factor  |
| vvi-miRC477h-3p | VIT_217s0000g02070.1 | target 5' GGT-CTCCACCGCTTCCAAG 3'<br>::: ::::::::::::::::::::<br>miRNA 3' CCAGGGGTGGCCGAAGGTTG 5' | 2.5   | 135-154 | Deoxyhypusine synthase            |
| vvi-miRC477h-3p | VIT_217s0000g02070.2 | target 5' GGT-CTCCACCGCTTCCAAG 3'<br>::: ::::::::::::::::::::<br>miRNA 3' CCAGGGGTGGCCGAAGGTTG 5' | 2.5   | 135-154 | Deoxyhypusine synthase            |
| vvi-miRC477h-3p | VIT_217s0000g02070.3 | target 5' GGT-CTCCACCGCTTCCAAG 3'<br>::: ::::::::::::::::::::<br>miRNA 3' CCAGGGGTGGCCGAAGGTTG 5' | 2.5   | 135-154 | Deoxyhypusine synthase            |
| vvi-miRC477h-5p | VIT_201s0010g02270.1 | target 5' ATATTGGAAGCCTTTGAGGGA 3'<br>: ::::::::::::::::::::<br>miRNA 3' TTAAACCTTCGGAAACTCCCT 5' | 1     | 778-798 | Gras family transcription factor  |
| vvi-miRC477h-5p | VIT_217s0000g10300.1 | target 5' ATATTGGAAGCCTTTGAGGGA 3'<br>: ::::::::::::::::::::<br>miRNA 3' TTAAACCTTCGGAAACTCCCT 5' | 1     | 748-768 | Gras family transcription factor  |



| miRNA          | Target id            | Alignment                                                                                              | Score | Range   | Target gene functional annotation                                    |
|----------------|----------------------|--------------------------------------------------------------------------------------------------------|-------|---------|----------------------------------------------------------------------|
| vvi-miRC530-3p | VIT_200s0267g00060.1 | target 5' TCTTCACCTTCACCT-CACCT 3'<br>::: :::::::::::::: :::::<br>miRNA 3' AGACGTGGAAGTGGACGTGGA 5'    | 3     | 31-Dec  | Unnamed protein product [Vitis vinifera]                             |
| vvi-miRC530-3p | VIT_201s0011g03410.1 | target 5' ACTGCACCTGCACCTGCACCT 3'<br>:::::::::::: ::::::::::::::<br>miRNA 3' AGACGTGGAAGTGGACGTGGA 5' | 3     | 262-282 | Uv excision repair protein                                           |
| vvi-miRC530-3p | VIT_201s0011g03410.2 | target 5' ACTGCACCTGCACCTGCACCT 3'<br>:::::::::::: ::::::::::::::<br>miRNA 3' AGACGTGGAAGTGGACGTGGA 5' | 3     | 262-282 | Dna repair protein rad23-3                                           |
| vvi-miRC530-3p | VIT_201s0011g03410.3 | target 5' ACTGCACCTGCACCTGCACCT 3'<br>:::::::::::: ::::::::::::::<br>miRNA 3' AGACGTGGAAGTGGACGTGGA 5' | 3     | 340-360 | Dna repair protein rad23-3                                           |
| vvi-miRC530-3p | VIT_201s0011g03410.4 | target 5' ACTGCACCTGCACCTGCACCT 3'<br>:::::::::::: ::::::::::::::<br>miRNA 3' AGACGTGGAAGTGGACGTGGA 5' | 3     | 340-360 | Dna repair protein rad23-3                                           |
| vvi-miRC530-3p | VIT_202s0025g01250.1 | target 5' TCTTCATCCTTCACTTGCACCT 3'<br>::: : : ::::::::::::::<br>miRNA 3' AGACGT-GGAAGTGGACGTGGA 5'    | 3     | 69-90   | Nucleoporin seh1-like                                                |
| vvi-miRC530-3p | VIT_202s0025g01250.2 | target 5' TCTTCATCCTTCACTTGCACCT 3'<br>::: : : ::::::::::::::<br>miRNA 3' AGACGT-GGAAGTGGACGTGGA 5'    | 3     | 127-148 | Nucleoporin seh1-like                                                |
| vvi-miRC530-3p | VIT_213s0067g01550.1 | target 5' TCTTCACCTTCACCTTCACCT 3'<br>::: :::::::::::::: :::::<br>miRNA 3' AGACGTGGAAGTGGACGTGGA 5'    | 3     | 670-690 | Probable lrr receptor-like serine threonine-protein kinase mrh1-like |
| vvi-miRC530-5p | VIT_202s0012g02510.1 | target 5' AGGT-CAGGTGCAAATGCAGG 3'<br>::::: ::::::::::::::<br>miRNA 3' TCCACGTCCACGTTTACGTCT 5'        | 1.5   | 268-287 | Protein                                                              |
| vvi-miRC530-5p | VIT_205s0020g04860.1 | target 5' AGGTGCAGGTGCAAATGCAGG 3'<br>:::::::::::: ::::::::::::::<br>miRNA 3' TCCACGTCCACGTTTACGTCT 5' | 0.5   | 99-119  | Zinc knuckle (cchc-type) family protein                              |
| vvi-miRC530-5p | VIT_205s0020g04860.2 | target 5' AGGTGCAGGTGCAAATGCAGG 3'<br>:::::::::::: ::::::::::::::<br>miRNA 3' TCCACGTCCACGTTTACGTCT 5' | 0.5   | 258-278 | Zinc knuckle (cchc-type) family protein                              |
| vvi-miRC530-5p | VIT_205s0020g04860.3 | target 5' AGGTGCAGGTGCAAATGCAGG 3'<br>:::::::::::: ::::::::::::::<br>miRNA 3' TCCACGTCCACGTTTACGTCT 5' | 0.5   | 168-188 | Zinc knuckle (cchc-type) family protein                              |
| vvi-miRC530-5p | VIT_205s0020g04860.4 | target 5' AGGTGCAGGTGCAAATGCAGG 3'<br>:::::::::::: ::::::::::::::<br>miRNA 3' TCCACGTCCACGTTTACGTCT 5' | 0.5   | 258-278 | Zinc knuckle (cchc-type) family protein                              |
| vvi-miRC530-5p | VIT_205s0020g04860.6 | target 5' AGGTGCAGGTGCAAATGCAGG 3'<br>:::::::::::: ::::::::::::::<br>miRNA 3' TCCACGTCCACGTTTACGTCT 5' | 0.5   | 258-278 | Zinc knuckle (cchc-type) family protein                              |

| miRNA           | Target id            | Alignment                                                                                                        | Score | Range     | Target gene functional annotation             |
|-----------------|----------------------|------------------------------------------------------------------------------------------------------------------|-------|-----------|-----------------------------------------------|
| vvi-miRC530-5p  | VIT_205s0020g04860.7 | target 5' AGGTGCAGGTGCAAATGCAGG 3'<br>: : : : : : : : : : : : : : : : : :<br>miRNA 3' TCCACGTCCACGTTTACGTCT 5'   | 0.5   | 258-278   | Zinc knuckle (cchc-type) family protein       |
| vvi-miRC530-5p  | VIT_206s0080g00400.1 | target 5' AGGTGCAGGTGCAGATGCAGG 3'<br>: : : : : : : : : : : : : : : : : :<br>miRNA 3' TCCACGTCCACGTTTACGTCT 5'   | 1.5   | 143-163   | Ribosomal protein l1                          |
| vvi-miRC530a    | VIT_202s0012g02510.1 | target 5' AGGT-CAGGTGCAAATGCAGG 3'<br>: : : : : : : : : : : : : : : : : :<br>miRNA 3' TCCACGTCCACGTTTACGTCT 5'   | 1.5   | 268-287   | Protein                                       |
| vvi-miRC530a    | VIT_205s0020g04860.1 | target 5' AGGTGCAGGTGCAAATGCAGG 3'<br>: : : : : : : : : : : : : : : : : :<br>miRNA 3' TCCACGTCCACGTTTACGTCT 5'   | 0.5   | 99-119    | Zinc knuckle (cchc-type) family protein       |
| vvi-miRC530a    | VIT_205s0020g04860.2 | target 5' AGGTGCAGGTGCAAATGCAGG 3'<br>: : : : : : : : : : : : : : : : : :<br>miRNA 3' TCCACGTCCACGTTTACGTCT 5'   | 0.5   | 258-278   | Zinc knuckle (cchc-type) family protein       |
| vvi-miRC530a    | VIT_205s0020g04860.3 | target 5' AGGTGCAGGTGCAAATGCAGG 3'<br>: : : : ~ ~ ~ ~ ~ ~ ~ ~ ~ ~ ~ ~ ~ ~<br>miRNA 3' TCCACGTCCACGTTTACGTCT 5'   | 0.5   | 168-188   | Zinc knuckle (cchc-type) family protein       |
| vvi-miRC530a    | VIT_205s0020g04860.4 | target 5' AGGTGCAGGTGCAAATGCAGG 3'<br>: : : : ~ ~ ~ ~ ~ ~ ~ ~ ~ ~ ~ ~ ~ ~<br>miRNA 3' TCCACGTCCACGTTTACGTCT 5'   | 0.5   | 258-278   | Zinc knuckle (cchc-type) family protein       |
| vvi-miRC530a    | VIT_205s0020g04860.6 | target 5' AGGTGCAGGTGCAAATGCAGG 3'<br>: : : : ~ ~ ~ ~ ~ ~ ~ ~ ~ ~ ~ ~ ~ ~<br>miRNA 3' TCCACGTCCACGTTTACGTCT 5'   | 0.5   | 258-278   | Zinc knuckle (cchc-type) family protein       |
| vvi-miRC530a    | VIT_205s0020g04860.7 | target 5' AGGTGCAGGTGCAAATGCAGG 3'<br>: : : : ~ ~ ~ ~ ~ ~ ~ ~ ~ ~ ~ ~ ~ ~<br>miRNA 3' TCCACGTCCACGTTTACGTCT 5'   | 0.5   | 258-278   | Zinc knuckle (cchc-type) family protein       |
| vvi-miRC530a    | VIT_206s0080g00400.1 | target 5' AGGTGCAGGTGCAGATGCAGG 3'<br>: : : : ~ ~ ~ ~ ~ ~ ~ ~ ~ ~ ~ ~ ~ ~<br>miRNA 3' TCCACGTCCACGTTTACGTCT 5'   | 1.5   | 143-163   | Ribosomal protein l1                          |
| vvi-miRC535f-3p | VIT_200s0358g00010.1 | target 5' CTTGACAACGAGAGAGAGCAC 3'<br>: : : : ~ ~ ~ ~ ~ ~ ~ ~ ~ ~ ~ ~ ~ ~<br>miRNA 3' ATACTGTCGCTCTCTCTCGTG 5'   | 3     | 72-92     | Unnamed protein product [Vitis vinifera]      |
| vvi-miRC535f-3p | VIT_207s0104g00030.1 | target 5' CTTGACAACGAGAGAGAGCAC 3'<br>: : : : ~ ~ ~ ~ ~ ~ ~ ~ ~ ~ ~ ~ ~ ~<br>miRNA 3' ATACTGTCGCTCTCTCTCGTG 5'   | 3     | 72-92     | Unnamed protein product [Vitis vinifera]      |
| vvi-miRC535f-5p | VIT_201s0011g00130.1 | target 5' ATTGTGCTCTCTCTTCTGTCA 3'<br>: : : : ~ ~ ~ ~ ~ ~ ~ ~ ~ ~ ~ ~ ~ ~<br>miRNA 3' TCACACGAGAGAGAGAA-ACAGT 5' | 3     | 1247-1269 | Squamosa promoter-binding-like protein 6-like |
| vvi-miRC535f-5p | VIT_201s0011g00130.2 | target 5' ATTGTGCTCTCTCTTCTGTCA 3'<br>: : : : ~ ~ ~ ~ ~ ~ ~ ~ ~ ~ ~ ~ ~ ~<br>miRNA 3' TCACACGAGAGAGAGAA-ACAGT 5' | 3     | 1247-1269 | Squamosa promoter-binding-like protein 6-like |

| miRNA           | Target id            | Alignment |                                                                                                  | Score | Range     | Target gene functional annotation             |
|-----------------|----------------------|-----------|--------------------------------------------------------------------------------------------------|-------|-----------|-----------------------------------------------|
| vvi-miRC535f-5p | VIT_217s0000g01260.1 | target    | 5' ATTGTGCTCTCTCTCTTCTGTCA 3'<br>: :::::::::::::::::::: :<br>miRNA 3' TCACACGAGAGAGAGAA-ACAGT 5' | 3     | 950-972   | Squamosa promoter-binding-like protein 13     |
| vvi-miRC535g-3p | VIT_200s0358g00010.1 | target    | 5' CTTGACAACGAGAGAGAGCAC 3'<br>: :::::::::::::::::::: :<br>miRNA 3' ATACTGTCGCTCTCTCTCGTG 5'     | 3     | 72-92     | Unnamed protein product [Vitis vinifera]      |
| vvi-miRC535g-3p | VIT_207s0104g00030.1 | target    | 5' CTTGACAACGAGAGAGAGCAC 3'<br>: :::::::::::::::::::: :<br>miRNA 3' ATACTGTCGCTCTCTCTCGTG 5'     | 3     | 72-92     | Unnamed protein product [Vitis vinifera]      |
| vvi-miRC535g-5p | VIT_201s0011g00130.1 | target    | 5' ATTGTGCTCTCTCTCTTCTGTCA 3'<br>: :::::::::::::::::::: :<br>miRNA 3' TCACACGAGAGAGAGAA-ACAGT 5' | 3     | 1247-1269 | Squamosa promoter-binding-like protein 6-like |
| vvi-miRC535g-5p | VIT_201s0011g00130.2 | target    | 5' ATTGTGCTCTCTCTCTTCTGTCA 3'<br>: :::::::::::::::::::: :<br>miRNA 3' TCACACGAGAGAGAGAA-ACAGT 5' | 3     | 1247-1269 | Squamosa promoter-binding-like protein 6-like |
| vvi-miRC535g-5p | VIT_217s0000g01260.1 | target    | 5' ATTGTGCTCTCTCTCTTCTGTCA 3'<br>: :::::::::::::::::::: :<br>miRNA 3' TCACACGAGAGAGAGAA-ACAGT 5' | 3     | 950-972   | Squamosa promoter-binding-like protein 13     |
| vvi-miRC827-3p  | VIT_204s0008g05050.1 | target    | 5' TGTTT-TTGTTGATCATCTAA 3'<br>: :::: :<br>miRNA 3' ACAAACAATACTAGTAGATT 5'                      | 3     | 393-412   | Pentatricopeptide repeat-containing protein   |
| vvi-miRC827-5p  | VIT_201s0026g01490.1 | target    | 5' CAC-AGAAGACCAGCAACAAAA 3'<br>: : :<br>miRNA 3' CTGATCTACTGGTCGTTGTTTT 5'                      | 3     | 465-485   | Nitrate transporter                           |
| vvi-miRC827-5p  | VIT_201s0026g01490.2 | target    | 5' CAC-AGAAGACCAGCAACAAAA 3'<br>: : :<br>miRNA 3' CTGATCTACTGGTCGTTGTTTT 5'                      | 3     | 54-74     | Nitrate transporter                           |

<sup>a</sup> Score refers to values given by Target Finder using a plant-based scoring metric.

<sup>b</sup> Complementary site of the microRNA with the target gene.
