# Supplementary material for: miRVine: a microRNA expression atlas of grapevine based on small RNA sequencing
Source: PubMed Central journal article supplement (PMC4434875; doi:10.1186/s12864-015-1610-5), 2015-05-16
Supplement: 12864_2015_1610_MOESM10_ESM.pdf [file 12864_2015_1610_MOESM10_ESM.pdf]

| miRNA          | Target id          | Correlation | P value  | Annotation                                                          |
|----------------|--------------------|-------------|----------|---------------------------------------------------------------------|
| grape-m5176    | VIT_218s0001g11250 | -0.46       | 2.50E-02 | NBS-LRR resistance protein                                          |
| grape-m6905    | VIT_213s0064g00290 | -0.44       | 3.11E-02 | bifunctional dihydroflavonol 4-reductase flavanone 4-reductase-like |
| vvi-miR156b-5p | VIT_201s0011g00130 | -0.52       | 8.90E-03 | squamosa promoter-binding-like protein 6-like                       |
| vvi-miR156b-5p | VIT_208s0007g06270 | -0.47       | 1.92E-02 | squamosa promoter-binding-like protein 9-like                       |
| vvi-miR156b-5p | VIT_211s0065g00170 | -0.45       | 2.71E-02 | squamosa promoter-binding-like protein 12-like                      |
| vvi-miR156b-5p | VIT_215s0021g02290 | -0.44       | 3.14E-02 | squamosa promoter-binding-like protein 7-like                       |
| vvi-miR156b-5p | VIT_214s0068g01780 | -0.42       | 4.03E-02 | squamosa promoter-binding-like protein 16-like                      |
| vvi-miR156c-5p | VIT_201s0011g00130 | -0.52       | 8.90E-03 | squamosa promoter-binding-like protein 6-like                       |
| vvi-miR156c-5p | VIT_208s0007g06270 | -0.47       | 1.92E-02 | squamosa promoter-binding-like protein 9-like                       |
| vvi-miR156c-5p | VIT_211s0065g00170 | -0.45       | 2.71E-02 | squamosa promoter-binding-like protein 12-like                      |
| vvi-miR156c-5p | VIT_215s0021g02290 | -0.44       | 3.14E-02 | squamosa promoter-binding-like protein 7-like                       |
| vvi-miR156c-5p | VIT_214s0068g01780 | -0.42       | 4.03E-02 | squamosa promoter-binding-like protein 16-like                      |
| vvi-miR156d-5p | VIT_201s0011g00130 | -0.52       | 8.90E-03 | squamosa promoter-binding-like protein 6-like                       |
| vvi-miR156d-5p | VIT_208s0007g06270 | -0.47       | 1.92E-02 | squamosa promoter-binding-like protein 9-like                       |
| vvi-miR156d-5p | VIT_211s0065g00170 | -0.45       | 2.71E-02 | squamosa promoter-binding-like protein 12-like                      |
| vvi-miR156d-5p | VIT_215s0021g02290 | -0.44       | 3.14E-02 | squamosa promoter-binding-like protein 7-like                       |
| vvi-miR156d-5p | VIT_214s0068g01780 | -0.42       | 4.03E-02 | squamosa promoter-binding-like protein 16-like                      |
| vvi-miR156f    | VIT_211s0065g00170 | -0.53       | 7.18E-03 | squamosa promoter-binding-like protein 12-like                      |
| vvi-miR156f    | VIT_217s0000g05020 | -0.44       | 3.07E-02 | squamosa promoter-binding-like protein 6-like                       |
| vvi-miR156g-5p | VIT_211s0065g00170 | -0.53       | 7.18E-03 | squamosa promoter-binding-like protein 12-like                      |
| vvi-miR156g-5p | VIT_217s0000g05020 | -0.44       | 3.07E-02 | squamosa promoter-binding-like protein 6-like                       |
| vvi-miR156i    | VIT_211s0065g00170 | -0.53       | 7.18E-03 | squamosa promoter-binding-like protein 12-like                      |
| vvi-miR156i    | VIT_217s0000g05020 | -0.44       | 3.07E-02 | squamosa promoter-binding-like protein 6-like                       |
| vvi-miR166b-3p | VIT_204s0008g03250 | -0.51       | 1.09E-02 | class III HD-Zip protein 8                                          |
| vvi-miR166d-5p | VIT_208s0056g01350 | -0.46       | 2.54E-02 | uncharacterized protein                                             |
| vvi-miR3635-3p | VIT_217s0000g05850 | -0.52       | 8.69E-03 | ABC transporter retinal flippase subfamily                          |
| vvi-miR394c    | VIT_201s0010g03730 | -0.60       | 1.85E-03 | F-box family protein                                                |
| vvi-miR394c    | VIT_201s0010g03730 | -0.60       | 1.85E-03 | F-box family protein                                                |
| vvi-miR396a-5p | VIT_202s0025g02680 | -0.42       | 4.36E-02 | uncharacterized protein loc100258227                                |
| vvi-miR396c-5p | VIT_202s0025g02680 | -0.48       | 1.85E-02 | uncharacterized protein loc100258227                                |
| vvi-miR396d-5p | VIT_202s0025g02680 | -0.48       | 1.85E-02 | uncharacterized protein loc100258227                                |
| vvi-miR397a-5p | VIT_208s0040g01790 | -0.43       | 3.83E-02 | laccase (diphenol oxidase)-like protein                             |

|                 |                    |       |          |                                         |
|-----------------|--------------------|-------|----------|-----------------------------------------|
| vvi-miR397a-5p  | VIT_208s0040g01790 | -0.43 | 3.83E-02 | laccase (diphenol oxidase)-like protein |
| vvi-miR408-3p   | VIT_212s0034g01140 | -0.48 | 1.86E-02 | basic blue protein                      |
| vvi-miR408-3p   | VIT_218s0001g15240 | -0.42 | 4.17E-02 | basic blue protein                      |
| vvi-miRC171h-3p | VIT_202s0154g00400 | -0.48 | 1.69E-02 | gras family transcription factor        |
| vvi-miRC171j    | VIT_202s0154g00400 | -0.48 | 1.69E-02 | gras family transcription factor        |
| vvi-miRC477c-3p | VIT_217s0000g02070 | -0.44 | 3.19E-02 | deoxyhypusine synthase                  |
| vvi-miRC477d-3p | VIT_217s0000g02070 | -0.44 | 3.19E-02 | deoxyhypusine synthase                  |
| vvi-miRC477e-3p | VIT_217s0000g02070 | -0.44 | 3.19E-02 | deoxyhypusine synthase                  |
| vvi-miRC477g-3p | VIT_217s0000g02070 | -0.44 | 3.19E-02 | deoxyhypusine synthase                  |
| vvi-miRC477h-3p | VIT_217s0000g02070 | -0.44 | 3.19E-02 | deoxyhypusine synthase                  |
