# Supplementary material for: miRVine: a microRNA expression atlas of grapevine based on small RNA sequencing
Source: PubMed Central journal article supplement (PMC4434875; doi:10.1186/s12864-015-1610-5), 2015-05-16
Supplement: 12864_2015_1610_MOESM11_ESM.pdf [file 12864_2015_1610_MOESM11_ESM.pdf]

| Leaf_M |                  |         | Bud_AB |                  |         | Bud_W |                  |         | Bud_L |                  |         |
|--------|------------------|---------|--------|------------------|---------|-------|------------------|---------|-------|------------------|---------|
| S.No   | miRNAs           | Reads   | S.No   | miRNAs           | Reads   | S.No  | miRNAs           | Reads   | S.No  | miRNAs           | Reads   |
| 1      | vvi-miR166c-3p   | 1411846 | 1      | vvi-miR166c-3p   | 1346029 | 1     | vvi-miR166c-3p   | 555991  | 1     | vvi-miR166c-3p   | 92987   |
| 2      | vvi-miR166d-3p   | 1411846 | 2      | vvi-miR166d-3p   | 1346029 | 2     | vvi-miR166d-3p   | 555991  | 2     | vvi-miR166d-3p   | 92987   |
| 3      | vvi-miR166e-3p   | 1411846 | 3      | vvi-miR166e-3p   | 1346029 | 3     | vvi-miR166e-3p   | 555991  | 3     | vvi-miR166e-3p   | 92987   |
| 4      | vvi-miR166f-3p   | 1411846 | 4      | vvi-miR166f-3p   | 1346029 | 4     | vvi-miR166f-3p   | 555991  | 4     | vvi-miR166f-3p   | 92987   |
| 5      | vvi-miR166g-3p   | 1411846 | 5      | vvi-miR166g-3p   | 1346029 | 5     | vvi-miR166g-3p   | 555991  | 5     | vvi-miR166g-3p   | 92987   |
| 6      | vvi-miR166h-3p   | 1411846 | 6      | vvi-miR166h-3p   | 1346029 | 6     | vvi-miR166h-3p   | 555991  | 6     | vvi-miR166h-3p   | 92987   |
| 7      | vvi-miRC166i-3p  | 1411846 | 7      | vvi-miRC166i-3p  | 1346029 | 7     | vvi-miRC166i-3p  | 555991  | 7     | vvi-miRC166i-3p  | 92987   |
| 8      | vvi-miR3634-3p   | 873783  | 8      | vvi-miR3634-3p   | 151813  | 8     | vvi-miR166a-3p   | 364999  | 8     | vvi-miR166a-3p   | 48087.5 |
| 9      | vvi-miR166a-3p   | 269926  | 9      | vvi-miR166a-3p   | 145257  | 9     | vvi-miR3634-3p   | 153711  | 9     | vvi-miR3634-3p   | 15087   |
| 10     | vvi-miR396c-5p   | 20442.5 | 10     | vvi-miR159c.1-3p | 27701.5 | 10    | vvi-miR159c.1-3p | 80921   | 10    | vvi-miR159c.2-3p | 12475.5 |
| 11     | vvi-miR396d-5p   | 20442.5 | 11     | grape-m3245-5p   | 22767   | 11    | vvi-miR162-3p    | 18238   | 11    | vvi-miR482-5p    | 7835    |
| 12     | vvi-miR162-3p    | 7812    | 12     | vvi-miR159c.2-3p | 10538   | 12    | grape-m3245-3p   | 17219   | 12    | grape-m3245-3p   | 6280    |
| 13     | vvi-miR396b-5p   | 5868.5  | 13     | vvi-miR166b-3p   | 7501    | 13    | vvi-miR3623-5p   | 16886   | 13    | grape-m3245-5p   | 6120    |
| 14     | vvi-miR159c.1-3p | 5538    | 14     | vvi-miR319b-3p   | 6495    | 14    | vvi-miR403a-3p   | 12730.5 | 14    | vvi-miR162-3p    | 5489    |
| 15     | vvi-miR403a-3p   | 2389    | 15     | vvi-miR319c-3p   | 6495    | 15    | vvi-miR403b      | 12730.5 | 15    | vvi-miR166c-5p   | 4634    |
| 16     | vvi-miR403b      | 2389    | 16     | vvi-miR319f-3p   | 6495    | 16    | vvi-miR403d      | 12730.5 | 16    | vvi-miR166e-5p   | 4634    |
| 17     | vvi-miR403d      | 2389    | 17     | vvi-miR319g      | 6495    | 17    | vvi-miR403e-3p   | 12730.5 | 17    | vvi-miRC166i-5p  | 4634    |
| 18     | vvi-miR403e-3p   | 2389    | 18     | vvi-miR159c.2-5p | 4646.5  | 18    | vvi-miR403f-3p   | 12730.5 | 18    | vvi-miR482-3p    | 4012.5  |
| 19     | vvi-miR403f-3p   | 2389    | 19     | vvi-miR482-5p    | 4146.5  | 19    | vvi-miR479-3p    | 11886   | 19    | vvi-miR403a-3p   | 3584.5  |
| 20     | vvi-miR3624-3p   | 2351    | 20     | vvi-miR482-3p    | 3137    | 20    | vvi-miR319b-3p   | 10155   | 20    | vvi-miR403b      | 3584.5  |

| Bud_B |                 |        | Rachis-FS |                  |         | Rachis-PFS |                 |         | Rachis-V |                  |        |
|-------|-----------------|--------|-----------|------------------|---------|------------|-----------------|---------|----------|------------------|--------|
| S.No  | miRNAs          | Reads  | S.No      | miRNAs           | Reads   | S.No       | miRNAs          | Reads   | S.No     | miRNAs           | Reads  |
| 1     | vvi-miR3634-3p  | 166556 | 1         | vvi-miR166c-3p   | 203009  | 1          | vvi-miR166c-3p  | 138097  | 1        | vvi-miR166c-3p   | 376710 |
| 2     | vvi-miR166c-3p  | 147487 | 2         | vvi-miR166d-3p   | 203009  | 2          | vvi-miR166d-3p  | 138097  | 2        | vvi-miR166d-3p   | 376710 |
| 3     | vvi-miR166d-3p  | 147487 | 3         | vvi-miR166e-3p   | 203009  | 3          | vvi-miR166e-3p  | 138097  | 3        | vvi-miR166e-3p   | 376710 |
| 4     | vvi-miR166e-3p  | 147487 | 4         | vvi-miR166f-3p   | 203009  | 4          | vvi-miR166f-3p  | 138097  | 4        | vvi-miR166f-3p   | 376710 |
| 5     | vvi-miR166f-3p  | 147487 | 5         | vvi-miR166g-3p   | 203009  | 5          | vvi-miR166g-3p  | 138097  | 5        | vvi-miR166g-3p   | 376710 |
| 6     | vvi-miR166g-3p  | 147487 | 6         | vvi-miR166h-3p   | 203009  | 6          | vvi-miR166h-3p  | 138097  | 6        | vvi-miR166h-3p   | 376710 |
| 7     | vvi-miR166h-3p  | 147487 | 7         | vvi-miRC166i-3p  | 203009  | 7          | vvi-miRC166i-3p | 138097  | 7        | vvi-miRC166i-3p  | 376710 |
| 8     | vvi-miRC166i-3p | 147487 | 8         | vvi-miR159c.1-3p | 92341.5 | 8          | vvi-miR166a-3p  | 75475.5 | 8        | vvi-miR166a-3p   | 85632  |
| 9     | vvi-miR166a-3p  | 132012 | 9         | vvi-miR166a-3p   | 38556   | 9          | vvi-miR3634-3p  | 54838   | 9        | vvi-miR159c.1-3p | 57627  |

|    |                  |         |    |                 |         |    |                  |        |    |                |         |
|----|------------------|---------|----|-----------------|---------|----|------------------|--------|----|----------------|---------|
| 10 | vvi-miR159c.1-3p | 19145.5 | 10 | grape-m3245-5p  | 15702   | 10 | vvi-miR482-5p    | 30074  | 10 | vvi-miR3634-3p | 53037   |
| 11 | vvi-miR159c.2-3p | 11873   | 11 | vvi-miR319b-3p  | 15008.5 | 11 | vvi-miR159c.1-3p | 17441  | 11 | grape-m3245-5p | 10836.5 |
| 12 | vvi-miR482-5p    | 8991    | 12 | vvi-miR319c-3p  | 15008.5 | 12 | vvi-miR319b-3p   | 13780  | 12 | vvi-miR319b-3p | 7697    |
| 13 | grape-m3245-5p   | 8441.5  | 13 | vvi-miR319f-3p  | 15008.5 | 13 | vvi-miR319c-3p   | 13780  | 13 | vvi-miR319c-3p | 7697    |
| 14 | grape-m3245-3p   | 7087    | 14 | vvi-miR319g     | 15008.5 | 14 | vvi-miR319f-3p   | 13780  | 14 | vvi-miR319f-3p | 7697    |
| 15 | vvi-miR166b-5p   | 6810.5  | 15 | vvi-miR3634-3p  | 8488.5  | 15 | vvi-miR319g      | 13780  | 15 | vvi-miR319g    | 7697    |
| 16 | vvi-miR166f-5p   | 6810.5  | 16 | vvi-miR3633a-5p | 2451.5  | 16 | grape-m3245-5p   | 9973.5 | 16 | vvi-miR482-5p  | 6126    |
| 17 | vvi-miR166c-5p   | 4577    | 17 | vvi-miR482-5p   | 2064.5  | 17 | vvi-miR166c-5p   | 8773.5 | 17 | grape-m3245-3p | 3692.5  |
| 18 | vvi-miR166e-5p   | 4577    | 18 | vvi-miRC396e-5p | 1817.5  | 18 | vvi-miR166e-5p   | 8773.5 | 18 | vvi-miR162-3p  | 3369    |
| 19 | vvi-miRC166i-5p  | 4577    | 19 | grape-m2399     | 1682    | 19 | vvi-miRC166i-5p  | 8773.5 | 19 | vvi-miR319e    | 3184.5  |
| 20 | vvi-miR403a-3p   | 4511.5  | 20 | grape-m7218-5p  | 1430.5  | 20 | vvi-miR3633a-5p  | 8456   | 20 | vvi-miR166c-5p | 2504    |

| Rachis-MR |                  |         | Rachis-R |                  |         | Stem-G |                  |         | Tendrils-Y |                  |         |
|-----------|------------------|---------|----------|------------------|---------|--------|------------------|---------|------------|------------------|---------|
| S.No      | miRNAs           | Reads   | S.No     | miRNAs           | Reads   | S.No   | miRNAs           | Reads   | S.No       | miRNAs           | Reads   |
| 1         | vvi-miR166c-3p   | 76117   | 1        | vvi-miR166a-3p   | 41422.5 | 1      | vvi-miR3634-3p   | 336382  | 1          | vvi-miR166a-3p   | 374005  |
| 2         | vvi-miR166d-3p   | 76117   | 2        | vvi-miR3634-3p   | 40550   | 2      | vvi-miR166a-3p   | 259763  | 2          | vvi-miR3634-3p   | 255677  |
| 3         | vvi-miR166e-3p   | 76117   | 3        | vvi-miR166c-3p   | 32917.5 | 3      | vvi-miR166c-3p   | 154311  | 3          | vvi-miR166c-3p   | 110023  |
| 4         | vvi-miR166f-3p   | 76117   | 4        | vvi-miR166d-3p   | 32917.5 | 4      | vvi-miR166d-3p   | 154311  | 4          | vvi-miR166d-3p   | 110023  |
| 5         | vvi-miR166g-3p   | 76117   | 5        | vvi-miR166e-3p   | 32917.5 | 5      | vvi-miR166e-3p   | 154311  | 5          | vvi-miR166e-3p   | 110023  |
| 6         | vvi-miR166h-3p   | 76117   | 6        | vvi-miR166f-3p   | 32917.5 | 6      | vvi-miR166f-3p   | 154311  | 6          | vvi-miR166f-3p   | 110023  |
| 7         | vvi-miRC166i-3p  | 76117   | 7        | vvi-miR166g-3p   | 32917.5 | 7      | vvi-miR166g-3p   | 154311  | 7          | vvi-miR166g-3p   | 110023  |
| 8         | vvi-miR3634-3p   | 49577   | 8        | vvi-miR166h-3p   | 32917.5 | 8      | vvi-miR166h-3p   | 154311  | 8          | vvi-miR166h-3p   | 110023  |
| 9         | vvi-miR166a-3p   | 43691   | 9        | vvi-miRC166i-3p  | 32917.5 | 9      | vvi-miRC166i-3p  | 154311  | 9          | vvi-miRC166i-3p  | 110023  |
| 10        | vvi-miR482-5p    | 14858.5 | 10       | vvi-miR162-3p    | 10113   | 10     | vvi-miR159c.1-3p | 30370.5 | 10         | vvi-miR159c.1-3p | 24273.5 |
| 11        | vvi-miR159c.1-3p | 10484.5 | 11       | vvi-miR482-5p    | 9525.5  | 11     | vvi-miR319b-3p   | 26134   | 11         | vvi-miR482-5p    | 21938   |
| 12        | grape-m3245-5p   | 7221    | 12       | grape-m3245-5p   | 8008.5  | 12     | vvi-miR319c-3p   | 26134   | 12         | vvi-miR162-3p    | 13413   |
| 13        | vvi-miR162-3p    | 5766.5  | 13       | grape-m3245-3p   | 4968.5  | 13     | vvi-miR319f-3p   | 26134   | 13         | grape-m3245-3p   | 12087   |
| 14        | grape-m3245-3p   | 5631    | 14       | vvi-miR159c.1-3p | 3732    | 14     | vvi-miR319g      | 26134   | 14         | vvi-miR166c-5p   | 8793.5  |
| 15        | vvi-miR166c-5p   | 3889.5  | 15       | vvi-miR3633a-5p  | 3336    | 15     | vvi-miR482-5p    | 9238    | 15         | vvi-miR166e-5p   | 8793.5  |
| 16        | vvi-miR166e-5p   | 3889.5  | 16       | vvi-miR3623-3p   | 2922.5  | 16     | vvi-miR166c-5p   | 8830    | 16         | vvi-miRC166i-5p  | 8793.5  |
| 17        | vvi-miRC166i-5p  | 3889.5  | 17       | vvi-miR403a-3p   | 2297    | 17     | vvi-miR166e-5p   | 8830    | 17         | grape-m3245-5p   | 7886    |
| 18        | vvi-miR3633a-5p  | 2678.5  | 18       | vvi-miR403b      | 2297    | 18     | vvi-miRC166i-5p  | 8830    | 18         | vvi-miR319b-3p   | 5806.5  |
| 19        | vvi-miR403a-3p   | 2184    | 19       | vvi-miR403d      | 2297    | 19     | grape-m3245-5p   | 6694.5  | 19         | vvi-miR319c-3p   | 5806.5  |
| 20        | vvi-miR403b      | 2184    | 20       | vvi-miR403e-3p   | 2297    | 20     | vvi-miR396c-5p   | 5793    | 20         | vvi-miR319f-3p   | 5806.5  |

| Tendril-WD |                  |         | Carpel |                  |         | Stamen |                  |         | Inf-Y |                  |         |
|------------|------------------|---------|--------|------------------|---------|--------|------------------|---------|-------|------------------|---------|
| S.No       | miRNAs           | Reads   | S.No   | miRNAs           | Reads   | S.No   | miRNAs           | Reads   | S.No  | miRNAs           | Reads   |
| 1          | vvi-miR166a-3p   | 468851  | 1      | vvi-miR159c.1-3p | 690175  | 1      | vvi-miR159c.1-3p | 310221  | 1     | vvi-miR166c-3p   | 708838  |
| 2          | vvi-miR166c-3p   | 234990  | 2      | vvi-miR319b-3p   | 59597.5 | 2      | vvi-miR319b-3p   | 79153   | 2     | vvi-miR166d-3p   | 708838  |
| 3          | vvi-miR166d-3p   | 234990  | 3      | vvi-miR319c-3p   | 59597.5 | 3      | vvi-miR319c-3p   | 79153   | 3     | vvi-miR166e-3p   | 708838  |
| 4          | vvi-miR166e-3p   | 234990  | 4      | vvi-miR319f-3p   | 59597.5 | 4      | vvi-miR319f-3p   | 79153   | 4     | vvi-miR166f-3p   | 708838  |
| 5          | vvi-miR166f-3p   | 234990  | 5      | vvi-miR319g      | 59597.5 | 5      | vvi-miR319g      | 79153   | 5     | vvi-miR166g-3p   | 708838  |
| 6          | vvi-miR166g-3p   | 234990  | 6      | grape-m3245-5p   | 46488   | 6      | vvi-miR166c-3p   | 25691.5 | 6     | vvi-miR166h-3p   | 708838  |
| 7          | vvi-miR166h-3p   | 234990  | 7      | vvi-miR166c-3p   | 31766.5 | 7      | vvi-miR166d-3p   | 25691.5 | 7     | vvi-miRC166i-3p  | 708838  |
| 8          | vvi-miRC166i-3p  | 234990  | 8      | vvi-miR166d-3p   | 31766.5 | 8      | vvi-miR166e-3p   | 25691.5 | 8     | vvi-miR3634-3p   | 305165  |
| 9          | vvi-miR3634-3p   | 208780  | 9      | vvi-miR166e-3p   | 31766.5 | 9      | vvi-miR166f-3p   | 25691.5 | 9     | vvi-miR166a-3p   | 201462  |
| 10         | vvi-miR159c.1-3p | 60522   | 10     | vvi-miR166f-3p   | 31766.5 | 10     | vvi-miR166g-3p   | 25691.5 | 10    | vvi-miR159c.1-3p | 40004.5 |
| 11         | vvi-miR482-5p    | 13486.5 | 11     | vvi-miR166g-3p   | 31766.5 | 11     | vvi-miR166h-3p   | 25691.5 | 11    | vvi-miR166c-5p   | 17148.5 |
| 12         | grape-m3245-3p   | 10735   | 12     | vvi-miR166h-3p   | 31766.5 | 12     | vvi-miRC166i-3p  | 25691.5 | 12    | vvi-miR166e-5p   | 17148.5 |
| 13         | vvi-miR162-3p    | 9730.5  | 13     | vvi-miRC166i-3p  | 31766.5 | 13     | grape-m3245-5p   | 17045   | 13    | vvi-miRC166i-5p  | 17148.5 |
| 14         | vvi-miR396c-5p   | 9553    | 14     | vvi-miR319e      | 9382.5  | 14     | vvi-miR398b-3p   | 9609    | 14    | grape-m3245-5p   | 10227.5 |
| 15         | vvi-miR396d-5p   | 9553    | 15     | vvi-miRC477f-3p  | 6237.5  | 15     | vvi-miR398c-3p   | 9609    | 15    | vvi-miR319b-3p   | 8539.5  |
| 16         | vvi-miR403a-3p   | 7712    | 16     | vvi-miR166b-3p   | 3367.5  | 16     | vvi-miR482-5p    | 6454.5  | 16    | vvi-miR319c-3p   | 8539.5  |
| 17         | vvi-miR403b      | 7712    | 17     | vvi-miR482-5p    | 3362    | 17     | vvi-miR156f      | 5625.5  | 17    | vvi-miR319f-3p   | 8539.5  |
| 18         | vvi-miR403d      | 7712    | 18     | vvi-miR398b-3p   | 3157    | 18     | vvi-miR156g-5p   | 5625.5  | 18    | vvi-miR319g      | 8539.5  |
| 19         | vvi-miR403e-3p   | 7712    | 19     | vvi-miR398c-3p   | 3157    | 19     | vvi-miR156i      | 5625.5  | 19    | vvi-miR166b-5p   | 8489    |
| 20         | vvi-miR403f-3p   | 7712    | 20     | vvi-miR156f      | 2639.5  | 20     | vvi-miR319e      | 5018.5  | 20    | vvi-miR166f-5p   | 8489    |

| Inf-WD |                 |         | Flower-FB |                 |         | Flower-F |                 |        | Berry-FS |                 |         |
|--------|-----------------|---------|-----------|-----------------|---------|----------|-----------------|--------|----------|-----------------|---------|
| S.No   | miRNAs          | Reads   | S.No      | miRNAs          | Reads   | S.No     | miRNAs          | Reads  | S.No     | miRNAs          | Reads   |
| 1      | vvi-miR166c-3p  | 1305947 | 1         | vvi-miR166c-3p  | 513460  | 1        | vvi-miR3634-3p  | 140452 | 1        | vvi-miR166c-3p  | 908707  |
| 2      | vvi-miR166d-3p  | 1305947 | 2         | vvi-miR166d-3p  | 513460  | 2        | vvi-miR166c-3p  | 122023 | 2        | vvi-miR166d-3p  | 908707  |
| 3      | vvi-miR166e-3p  | 1305947 | 3         | vvi-miR166e-3p  | 513460  | 3        | vvi-miR166d-3p  | 122023 | 3        | vvi-miR166e-3p  | 908707  |
| 4      | vvi-miR166f-3p  | 1305947 | 4         | vvi-miR166f-3p  | 513460  | 4        | vvi-miR166e-3p  | 122023 | 4        | vvi-miR166f-3p  | 908707  |
| 5      | vvi-miR166g-3p  | 1305947 | 5         | vvi-miR166g-3p  | 513460  | 5        | vvi-miR166f-3p  | 122023 | 5        | vvi-miR166g-3p  | 908707  |
| 6      | vvi-miR166h-3p  | 1305947 | 6         | vvi-miR166h-3p  | 513460  | 6        | vvi-miR166g-3p  | 122023 | 6        | vvi-miR166h-3p  | 908707  |
| 7      | vvi-miRC166i-3p | 1305947 | 7         | vvi-miRC166i-3p | 513460  | 7        | vvi-miR166h-3p  | 122023 | 7        | vvi-miRC166i-3p | 908707  |
| 8      | vvi-miR3634-3p  | 284537  | 8         | vvi-miR3634-3p  | 171663  | 8        | vvi-miRC166i-3p | 122023 | 8        | vvi-miR166a-3p  | 129452  |
| 9      | vvi-miR166a-3p  | 130906  | 9         | vvi-miR166a-3p  | 93820.5 | 9        | vvi-miR166a-3p  | 98738  | 9        | vvi-miR3634-3p  | 70207.5 |

|    |                  |         |    |                  |         |    |                  |         |    |                  |        |
|----|------------------|---------|----|------------------|---------|----|------------------|---------|----|------------------|--------|
| 10 | vvi-miR159c.1-3p | 16951.5 | 10 | vvi-miR162-3p    | 43447.5 | 10 | vvi-miR162-3p    | 42048   | 10 | vvi-miR159c.1-3p | 19575  |
| 11 | vvi-miR162-3p    | 8046    | 11 | grape-m3245-3p   | 15089.5 | 11 | grape-m3245-3p   | 26505   | 11 | grape-m3245-5p   | 15664  |
| 12 | grape-m3245-3p   | 6565    | 12 | vvi-miR159c.1-3p | 9989.5  | 12 | vvi-miR482-5p    | 16877.5 | 12 | vvi-miR166b-3p   | 8734.5 |
| 13 | vvi-miR319b-3p   | 5973.5  | 13 | vvi-miR403a-3p   | 8983    | 13 | vvi-miR159c.1-3p | 11100   | 13 | vvi-miR166c-5p   | 6054   |
| 14 | vvi-miR319c-3p   | 5973.5  | 14 | vvi-miR403b      | 8983    | 14 | vvi-miR168-5p    | 6218    | 14 | vvi-miR166e-5p   | 6054   |
| 15 | vvi-miR319f-3p   | 5973.5  | 15 | vvi-miR403d      | 8983    | 15 | vvi-miR403a-3p   | 6110    | 15 | vvi-miRC166i-5p  | 6054   |
| 16 | vvi-miR319g      | 5973.5  | 16 | vvi-miR403e-3p   | 8983    | 16 | vvi-miR403b      | 6110    | 16 | vvi-miR482-5p    | 3635.5 |
| 17 | vvi-miR166c-5p   | 5198.5  | 17 | vvi-miR403f-3p   | 8983    | 17 | vvi-miR403d      | 6110    | 17 | vvi-miRC396e-5p  | 3384.5 |
| 18 | vvi-miR166e-5p   | 5198.5  | 18 | vvi-miR168-3p    | 8016.5  | 18 | vvi-miR403e-3p   | 6110    | 18 | grape-m3245-3p   | 2101.5 |
| 19 | vvi-miRC166i-5p  | 5198.5  | 19 | vvi-miR166c-5p   | 6980.5  | 19 | vvi-miR403f-3p   | 6110    | 19 | vvi-miR162-3p    | 1969   |
| 20 | vvi-miR482-5p    | 5182    | 20 | vvi-miR166e-5p   | 6980.5  | 20 | vvi-miR166c-5p   | 5834.5  | 20 | vvi-miR166b-5p   | 1772.5 |

| Berry-PFS |                  |         | Berry-PV |                  |         | Berry-V |                  |         | Berry-MR |                  |         |
|-----------|------------------|---------|----------|------------------|---------|---------|------------------|---------|----------|------------------|---------|
| S.No      | miRNAs           | Reads   | S.No     | miRNAs           | Reads   | S.No    | miRNAs           | Reads   | S.No     | miRNAs           | Reads   |
| 1         | vvi-miR166c-3p   | 347960  | 1        | vvi-miR166c-3p   | 997373  | 1       | vvi-miR166c-3p   | 713119  | 1        | vvi-miR166c-3p   | 166018  |
| 2         | vvi-miR166d-3p   | 347960  | 2        | vvi-miR166d-3p   | 997373  | 2       | vvi-miR166d-3p   | 713119  | 2        | vvi-miR166d-3p   | 166018  |
| 3         | vvi-miR166e-3p   | 347960  | 3        | vvi-miR166e-3p   | 997373  | 3       | vvi-miR166e-3p   | 713119  | 3        | vvi-miR166e-3p   | 166018  |
| 4         | vvi-miR166f-3p   | 347960  | 4        | vvi-miR166f-3p   | 997373  | 4       | vvi-miR166f-3p   | 713119  | 4        | vvi-miR166f-3p   | 166018  |
| 5         | vvi-miR166g-3p   | 347960  | 5        | vvi-miR166g-3p   | 997373  | 5       | vvi-miR166g-3p   | 713119  | 5        | vvi-miR166g-3p   | 166018  |
| 6         | vvi-miR166h-3p   | 347960  | 6        | vvi-miR166h-3p   | 997373  | 6       | vvi-miR166h-3p   | 713119  | 6        | vvi-miR166h-3p   | 166018  |
| 7         | vvi-miRC166i-3p  | 347960  | 7        | vvi-miRC166i-3p  | 997373  | 7       | vvi-miRC166i-3p  | 713119  | 7        | vvi-miRC166i-3p  | 166018  |
| 8         | vvi-miR166a-3p   | 50292.5 | 8        | vvi-miR166a-3p   | 93482.5 | 8       | vvi-miR166a-3p   | 73075   | 8        | vvi-miR166a-3p   | 45213.5 |
| 9         | vvi-miR3634-3p   | 8865.5  | 9        | vvi-miR3634-3p   | 27356.5 | 9       | vvi-miR3634-3p   | 37580.5 | 9        | vvi-miR3634-3p   | 19130   |
| 10        | grape-m3245-5p   | 5726.5  | 10       | vvi-miR159c.1-3p | 23248   | 10      | vvi-miR162-3p    | 5996    | 10       | vvi-miR159c.1-3p | 6237.5  |
| 11        | vvi-miR159c.1-3p | 4774.5  | 11       | vvi-miR396b-5p   | 10637.5 | 11      | vvi-miR159c.1-3p | 5115.5  | 11       | vvi-miR162-3p    | 4608.5  |
| 12        | vvi-miR166c-5p   | 3567.5  | 12       | vvi-miR3623-5p   | 10522   | 12      | vvi-miR396b-5p   | 4629    | 12       | grape-m3245-5p   | 3436.5  |
| 13        | vvi-miR166e-5p   | 3567.5  | 13       | grape-m3245-5p   | 10349   | 13      | vvi-miR403a-3p   | 3930.5  | 13       | vvi-miR319e      | 2721    |
| 14        | vvi-miRC166i-5p  | 3567.5  | 14       | vvi-miR319e      | 7075.5  | 14      | vvi-miR403b      | 3930.5  | 14       | vvi-miR403a-3p   | 2197.5  |
| 15        | vvi-miR396b-5p   | 1839    | 15       | vvi-miR482-5p    | 5956.5  | 15      | vvi-miR403d      | 3930.5  | 15       | vvi-miR403b      | 2197.5  |
| 16        | grape-m3245-3p   | 1780.5  | 16       | vvi-miR166c-5p   | 5338.5  | 16      | vvi-miR403e-3p   | 3930.5  | 16       | vvi-miR403d      | 2197.5  |
| 17        | vvi-miRC396e-5p  | 1722    | 17       | vvi-miR166e-5p   | 5338.5  | 17      | vvi-miR403f-3p   | 3930.5  | 17       | vvi-miR403e-3p   | 2197.5  |
| 18        | vvi-miR482-3p    | 1367.5  | 18       | vvi-miRC166i-5p  | 5338.5  | 18      | grape-m3245-5p   | 2309    | 18       | vvi-miR403f-3p   | 2197.5  |
| 19        | vvi-miR162-3p    | 1329.5  | 19       | vvi-miRC396e-5p  | 5209    | 19      | vvi-miR3623-5p   | 1687.5  | 19       | vvi-miR482-5p    | 1708.5  |
| 20        | vvi-miR319e      | 974     | 20       | vvi-miR162-3p    | 4475    | 20      | vvi-miRC477c-3p  | 1635    | 20       | vvi-miRC396e-5p  | 1641    |

---

| Berry-R |                  |         |
|---------|------------------|---------|
| S.No    | miRNAs           | Reads   |
| 1       | vvi-miR166c-3p   | 456797  |
| 2       | vvi-miR166d-3p   | 456797  |
| 3       | vvi-miR166e-3p   | 456797  |
| 4       | vvi-miR166f-3p   | 456797  |
| 5       | vvi-miR166g-3p   | 456797  |
| 6       | vvi-miR166h-3p   | 456797  |
| 7       | vvi-miRC166i-3p  | 456797  |
| 8       | vvi-miR166a-3p   | 27529.5 |
| 9       | vvi-miR3634-3p   | 22796   |
| 10      | vvi-miR159c.1-3p | 13861   |
| 11      | vvi-miR162-3p    | 9241    |
| 12      | vvi-miR403a-3p   | 8974.5  |
| 13      | vvi-miR403b      | 8974.5  |
| 14      | vvi-miR403d      | 8974.5  |
| 15      | vvi-miR403e-3p   | 8974.5  |
| 16      | vvi-miR403f-3p   | 8974.5  |
| 17      | vvi-miRC477c-3p  | 4859.5  |
| 18      | vvi-miRC477d-3p  | 4859.5  |
| 19      | vvi-miRC477e-3p  | 4859.5  |
| 20      | vvi-miRC477g-3p  | 4859.5  |

---
