# Supplementary material for: miRVine: a microRNA expression atlas of grapevine based on small RNA sequencing
Source: PubMed Central journal article supplement (PMC4434875; doi:10.1186/s12864-015-1610-5), 2015-05-16

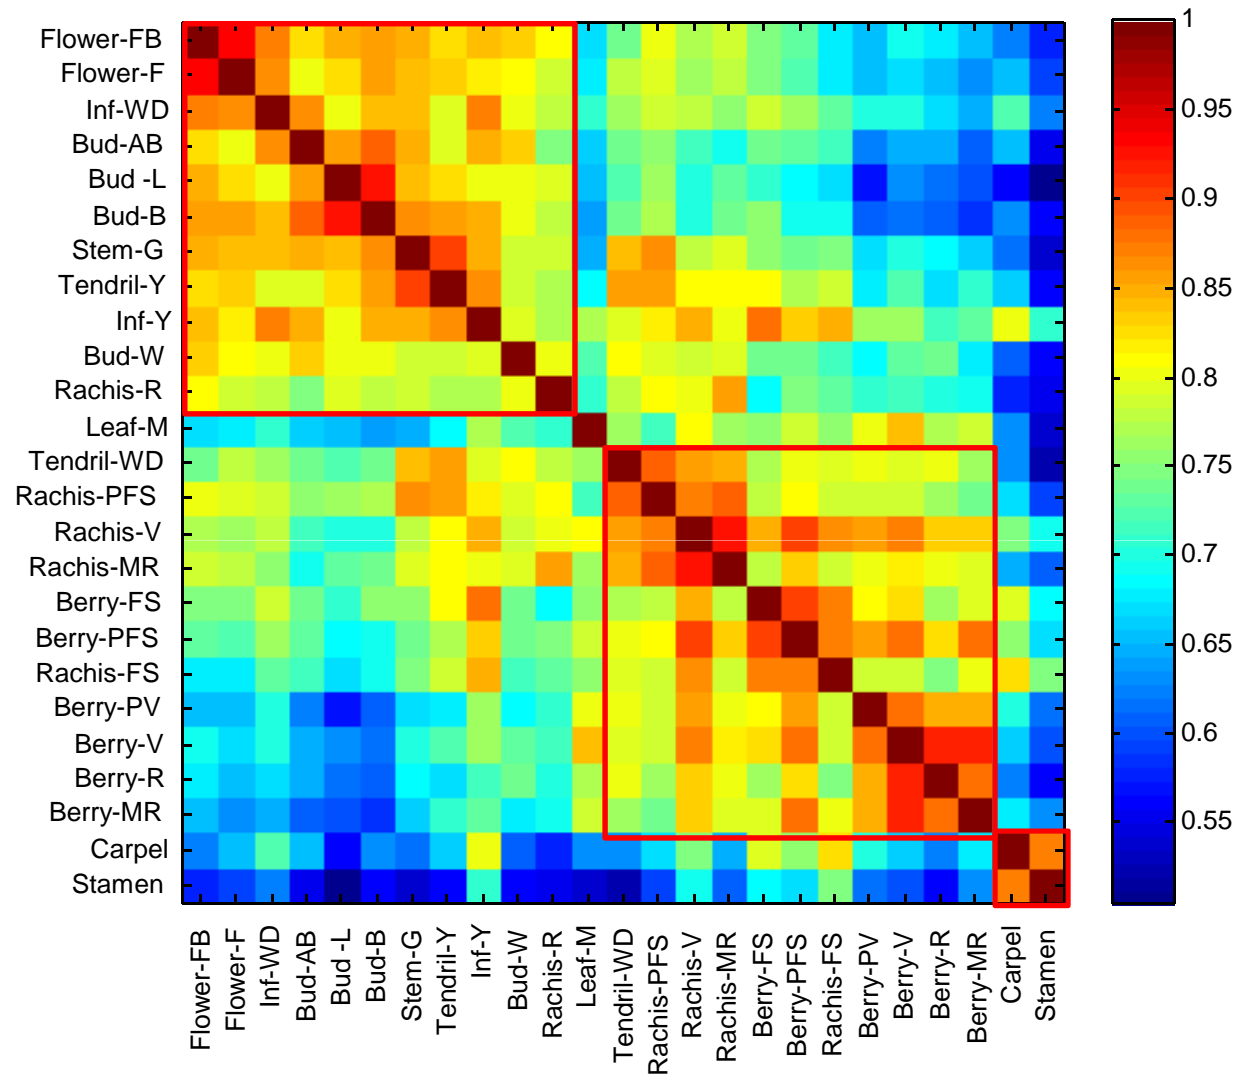

Supplement: 12864_2015_1610_MOESM12_ESM.pdf [file 12864_2015_1610_MOESM12_ESM.pdf]
