# Supplementary material for: miRVine: a microRNA expression atlas of grapevine based on small RNA sequencing
Source: PubMed Central journal article supplement (PMC4434875; doi:10.1186/s12864-015-1610-5), 2015-05-16
Supplement: 12864_2015_1610_MOESM14_ESM.pdf [file 12864_2015_1610_MOESM14_ESM.pdf]

| <b>Sample</b> | <b>Pearson coeff.</b> | <b>P-value</b> |
|---------------|-----------------------|----------------|
| Berry_FS      | 0.97                  | 2.02E-218      |
| Berry_MR      | 0.83                  | 6.78E-90       |
| Berry_PFS     | 0.88                  | 1.34E-115      |
| Berry_PV      | 0.96                  | 6.73E-193      |
| Berry_R       | 0.97                  | 7.73E-217      |
| Berry_V       | 0.96                  | 8.07E-193      |
| Bud_AB        | 0.96                  | 1.03E-197      |
| Bud_B         | 0.95                  | 1.09E-173      |
| Bud_L         | 0.95                  | 1.43E-183      |
| Bud_W         | 0.98                  | 9.14E-246      |
| Carpel        | 0.94                  | 2.01E-162      |
| Flower_F      | 0.96                  | 2.60E-190      |
| Flower_FB     | 0.97                  | 6.81E-212      |
| Inf_WD        | 0.99                  | 1.14E-275      |
| Inf_Y         | 0.96                  | 2.86E-197      |
| Leaf_FS       | 0.98                  | 5.94E-239      |
| Rachis_FS     | 0.92                  | 5.88E-147      |
| Rachis_MR     | 0.96                  | 1.87E-190      |
| Rachis_PFS    | 0.95                  | 2.62E-177      |
| Rachis_R      | 0.86                  | 1.26E-105      |
| Rachis_V      | 0.96                  | 2.54E-194      |
| Stamen        | 0.89                  | 1.43E-118      |
| Stem_G        | 0.97                  | 1.41E-219      |
| Tendril_WD    | 0.99                  | 2.43E-290      |
| Tendril_Y     | 0.95                  | 2.67E-181      |
