# Supplementary material for: miRVine: a microRNA expression atlas of grapevine based on small RNA sequencing
Source: PubMed Central journal article supplement (PMC4434875; doi:10.1186/s12864-015-1610-5), 2015-05-16
Supplement: 12864_2015_1610_MOESM15_ESM.pdf [file 12864_2015_1610_MOESM15_ESM.pdf]

| <b>Oligo Name</b> | <b>Sequence 5' to 3'</b>                           |
|-------------------|----------------------------------------------------|
| Rev universal     | GTGCAGGGTCCGAGGT                                   |
| 168-1Rev          | GAGCTGGGTCCGAGGT                                   |
| 166-1Rev          | GTGCAGGGAGGGAGGT                                   |
| 397-Rev           | GTCGAGGGTCCGAGGT                                   |
| vvi-miR172c-RT    | GTCGTATCCAGTGCAGGGTCCGAGGTATTCGCACTGGATACGACCTGCAG |
| vvi-miR172c-For   | TGGCGGGAATCTTGATGATG                               |
| vvi-miR319c-RT    | GTCGTATCCAGAGCTGGGTCCGAGGTATTCGCTCTGGATACGACAGGGAG |
| vvi-miR319c-For   | ACTGCGTTGGACTGAAGGGAG                              |
| vvi-miR396c-RT    | GTCGTATCCAGTGCAGGGTCCGAGGTATTCGCACTGGATACGACCAGTTC |
| vvi-miR396c-For   | GGCGGTTCCACAGCTTTCTT                               |
| vvi-miR166g-RT    | GTCGTATCCAGTGCAGGGAGGGAGGTATTCGCACTGGATACGACGGGGAA |
| vvi-miR166g-for   | TCACTTCGGACCAGGCTTCA                               |
| vvi-miR156f-RT    | GTCGTATCCAGTGCAGGGAGGGAGGTATTCGCACTGGATACGACGTGCTC |
| vvi-miR156f-For   | CGGCGGTTGACAGAAGATAGA                              |
| vvi-miR2950-RT    | GTCGTATCCAGTCGAGGGTCCGAGGTATTCGCACTGGATACGACTCCAGT |
| vvi-miR2950-For   | TCGCCTTCCATCTCTTGAC                                |
| vvi-miR390-RT     | GTCGTATCCAGTGCAGGGTCCGAGGTATTCGCACTGGATACGACGGCGCT |
| vvi-miR390-For    | TTGCGAAGCTCAGGAGGGAT                               |
| vvi-U6for         | CCGATAAAATTGGAACGATACAGAG                          |
| vvi-U6rev         | TCGATTTGTGCGTGTCATCCT                              |
| vvi-UBI For       | AATGGTCAGTTGGCCCTACCT                              |
| vvi-UBI Rev       | TGGCTGAGACCCACAAAACC                               |



**Supplementary Figure 2:** Number of putative miRNA target within the (A) PN40024 and (B) Corvina data sets, identified using the TargetFinder (release 1.6). Novel and known refer to the different classes of miRNAs.

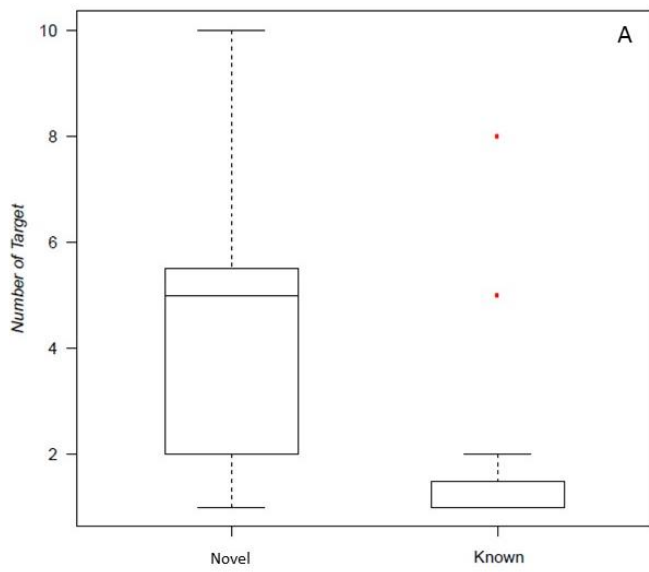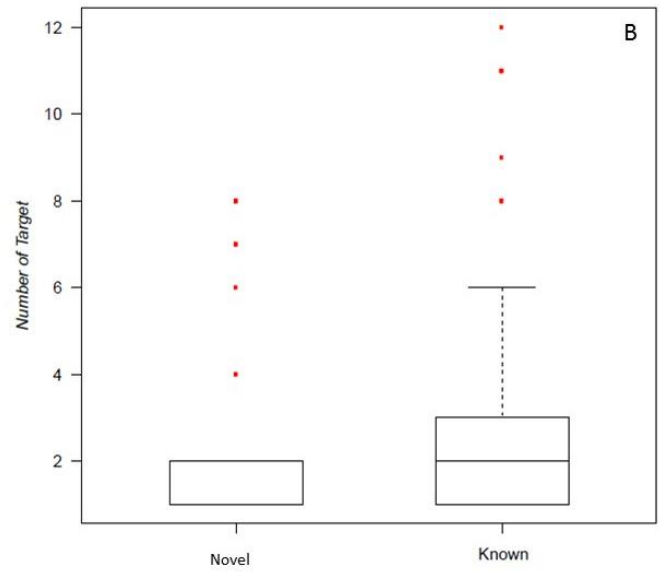

**Supplementary Figure 3:** Dendrogram of samples (columns) and miRNAs (rows) using log normalized data after replicates averaging.

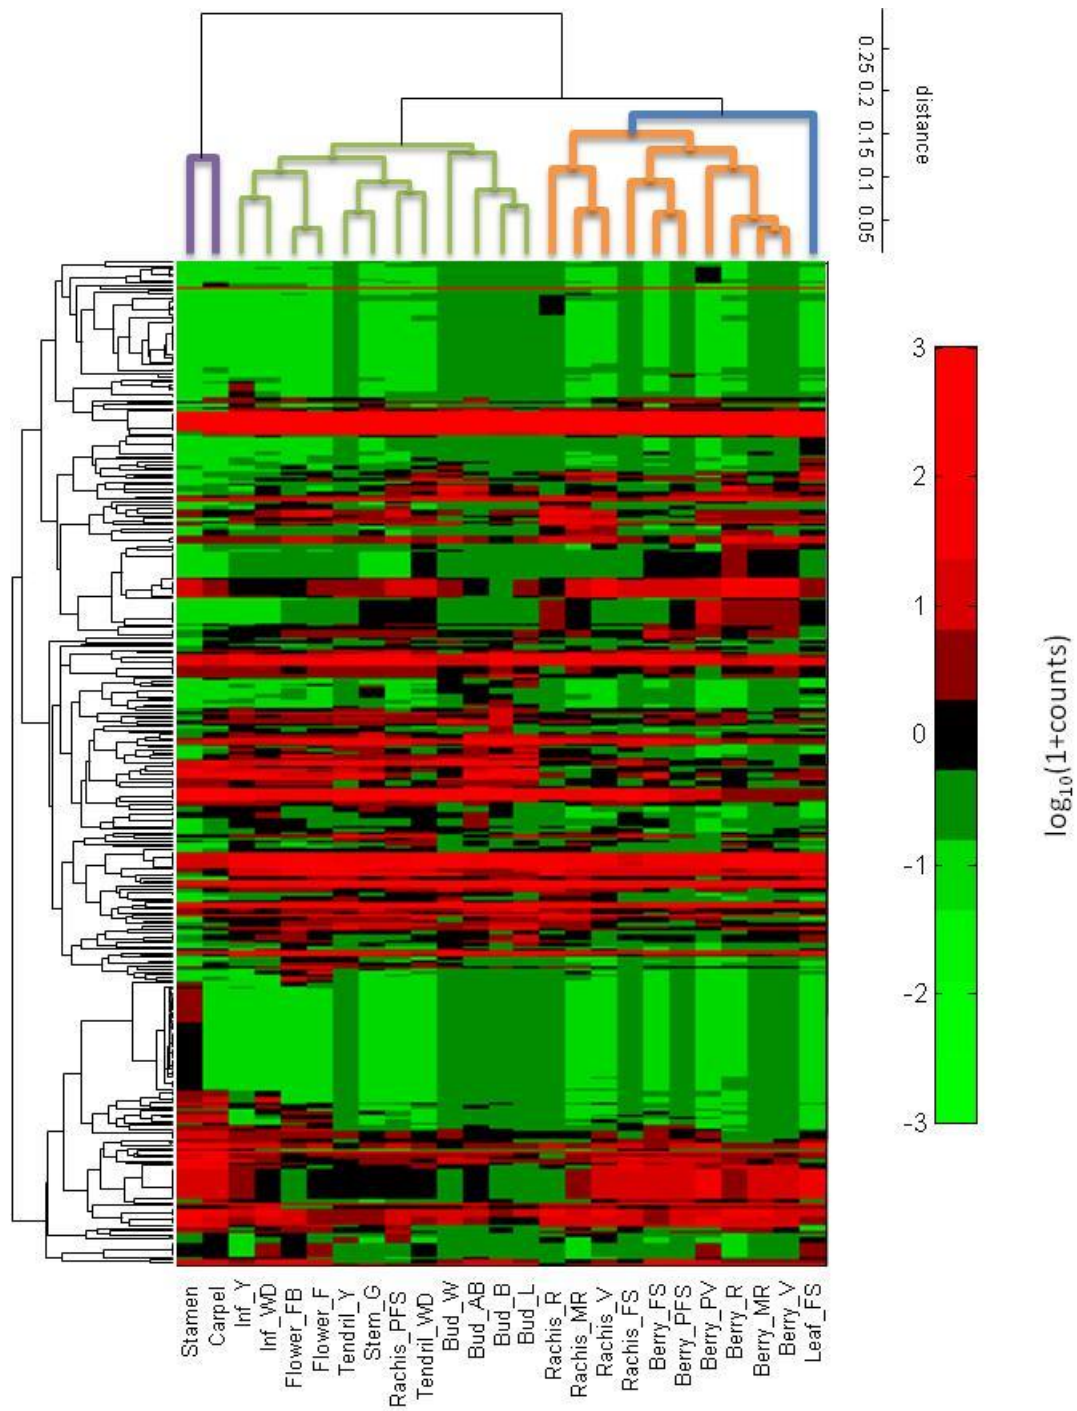

## Methods S1: Supplementary Plant material

Buds were collected at five developmental stages: namely first season latent bud (E-L 23), winter dormant bud (E-L 1), bud, burst showing green tip (E-L 4) and final bud stage after burst, (E-L 5). Inflorescences were collected at two developmental stages: young inflorescence with single flower in compact groups (E-L 14), and well-developed inflorescence with single flower separated (E-L 17). Flowers were collected at the beginning of flowering (E-L 20) and flowering phase (E-L 23); flower organs were collected from undisclosed flowers. Pollen was collected from disclosed flowers at 80% caps off (E-L25).

Tendrils were collected from two developmental stages: the first when the shoot bears seven separate leaves (E-L 14) and the second corresponding to a pool of well-developed tendrils collected when the shoot bears 12 separate leaves (E-L 17). Leaves were collected at three developmental stages: young leaves when the shoot contains about five well-separated leaves (EL14), mature leaves when the berry size was about 4 mm in diameter (E-L 29), and leaves in senescence, collected before the beginning of leaf fall (E-L43).

Berries were collected at six developmental time points by freezing the whole berry and removing the seeds. The six stages are fruit set (FS), 15 days after flowering (DAF; E-L29), post fruit set (PFS), when berries reach >7 mm diam. (E-L 31), pre-veraison (E-L 34), veraison (V), when berries change color (10.4 °Brix,70 DAF; E-L35), mid-ripening (MR) stage (84 DAF; E-L 36,15.5 °Brix) and the last stage ripening (R) (115 DAF; E-L 38, 15.5 °Brix). For post-harvest samples, bunches were placed for three months in single layers in naturally ventilated rooms, without any artificial control of temperature and humidity. Samples were collected every month. Withering stage I was characterized by a weight reduction of 23.6% and 24.5 °Brix, the second stage by weight reduction of 30.3% and 25.9 °Brix and the last stage by a weight reduction of 32.7% and 26.7 °Brix.
